# Supplementary material for: Green synthesis of glutaramides, piperidino[1,2-a]benzimidazol-1-ones and N-cyclopentenyl benzimidazolones enabled by microwave assisted domino reactions of cyclic 2-diazo-1,3-diketones with aniline derivatives
Source: Royal Society of Chemistry journal article supplement (doi:10.1039/d4qo00613e), 2024-01-01

# Supporting Information

## Green synthesis of glutaramide, piperidino[1,2-a]benzimidazol-1-one and *N*-cyclopentenyl benzimidazolone enabled by microwave assisted domino reactions of cyclic 2-diazo-1,3-diketones with aniline derivatives

Cheng Zhao,<sup>a,b†</sup> Xiao-Wei Hu,<sup>b†</sup> Yi-Bin Xu,<sup>b</sup> Xiong-Wei Liu,<sup>\*[a]</sup> You-Ping Tian,<sup>[a]</sup> and Yun-Lin  
Liu<sup>\*b,c,d</sup>

### Table of Contents

|                                                                                                          |     |
|----------------------------------------------------------------------------------------------------------|-----|
| 1) General Information                                                                                   | S1  |
| 2) General procedure and spectral data of glutaramides <b>3</b>                                          | S3  |
| 3) General procedure and spectral data of products <b>5</b>                                              | S7  |
| 4) General procedure and spectral data of products <b>7</b>                                              | S9  |
| 5) Scale-up synthesis and further transformations of the products                                        | S11 |
| 6) Mechanism experiments                                                                                 | S13 |
| 7) X-Ray crystallographic data for compounds <b>3a</b> , <b>5b</b> , <b>5g</b> , <b>7a</b> and <b>7e</b> | S16 |
| 8) Copies of <sup>1</sup> H NMR and <sup>13</sup> C NMR spectra of compounds <b>3-18</b> .               | S21 |

## 1. General Information

These reactions were monitored by thin layer chromatography using UV light to visualize the course of reaction. All reactions under microwave irradiation were performed in an Anton Parr microwave system (800 W) equipped with a build-in pressure measurement sensor and a vertically focused IR temperature sensor. Purification of reaction products was carried out by flash chromatography on silica gel. Chemical yields refer to pure isolated substances.  $^1\text{H}$  and  $^{13}\text{C}$  NMR spectra were obtained using Bruker DPX-400 spectrometer or Bruker DPX-500 spectrometer. Chemical shifts are reported in ppm from  $\text{CDCl}_3$ ,  $\text{CD}_3\text{OD}$ ,  $\text{DMSO-d}_6$  with the solvent resonance as the internal standard. The following abbreviations were used to designate chemical shift multiplicities: s = singlet, d = doublet, t = triplet, q = quartet, h = heptet, m = multiplet, sep = septet, dd = doublet of doublets, dt = doublet of triplets, br = broad.

Anhydrous solvents such as toluene, 1,4-dioxane, DMSO, and DMF were purchased from Energy Chemical. Unless otherwise stated, all purchased reagents were used without further purification. The cyclic 2-diazo-1,3-diketones **1**<sup>[1]</sup> and the bromination product **13**<sup>[2]</sup> were prepared according to the literature procedures.

[1] M. O. Erhunmwunse and P. G. Steel, *J. Org. Chem.*, 2008, **73**, 8675-8677.

[2] Y. Hirose, M. Yamazaki, M. Nogata, A. Nakamura and T. Maegawa, *J. Org. Chem.*, **2019**, *84*, 7405-7410.

## 2. General procedure and spectral data of glutaramides 3.

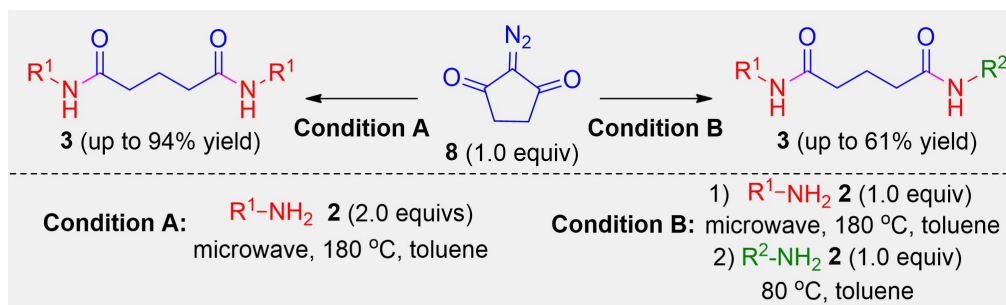

**General Procedure A:** Amines **2** ( $R^1-NH_2$ , 0.20 mmol) was added to a solution of 2-diazocyclopentane-1,3-dione **8** (0.10 mmol) in toluene (1.0 mL), the resulting mixture was subjected to microwave irradiation at a temperature of 180 °C for 1 h (800 W), after which the reaction mixture was cooled to room temperature. After removal of the solvent under vacuum, the residue was purified by column chromatography using petroleum ether/EtOAc (3:1 to 1:1) as the eluent to afford the symmetric  $N^1$ ,  $N^5$ -diaryl-glutaramides **3**.

**General Procedure B:** Amines **2** ( $R^1-NH_2$ , 0.10 mmol) was added to a solution of 2-diazocyclopentane-1,3-dione **8** (0.10 mmol) in toluene (1.0 mL), the resulting mixture was subjected to microwave irradiation at a temperature of 180 °C for 1 h (800 W), after which the reaction mixture was cooled to room temperature. Subsequently, another equivalent of substituted amines **2** ( $R^2-NH_2$ , 0.10 mmol) was added to the reaction tube. The resulting mixture was heated to 80 °C by microwave irradiation (1 h, 800 W). After completion of the reaction, the solvent was removed under vacuum, and the residue was purified by column chromatography using petroleum ether/EtOAc (3:1 to 1:1) as the eluent to afford the unsymmetric  $N^1$ ,  $N^5$ -diaryl-glutaramides **3**.

$N^1, N^5$ -di-*p*-tolylglutaramide (**3a**):

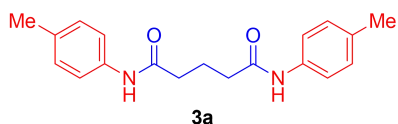

Following general procedure A, the title compound **3a** was obtained as a yellow solid with a 81% yield (25.1 mg, m.p. 151-152 °C).  $^1H$  NMR (400 MHz, DMSO- $d_6$ )  $\delta$  1.89 (p,  $J$  = 7.2 Hz, 2H), 2.23 (s, 6H), 2.34 (t,  $J$  = 7.2 Hz, 4H), 7.07 (ABd,  $J$  = 8.4 Hz, 4H), 7.47 (ABd,  $J$  = 8.0 Hz, 4H), 9.80 (s, 2H);  $^{13}C$  NMR (100 MHz, DMSO- $d_6$ )  $\delta$  170.62, 136.84, 131.85, 129.03, 119.12, 35.58, 21.03, 20.46; HRMS (ESI): Exact mass calcd for  $C_{19}H_{22}N_2O_2Na$   $[M+Na]^+$ : 333.3868, Found: 333.3872.

*N*<sup>1</sup>,*N*<sup>5</sup>-*di*-phenylglutaramide (**3b**):

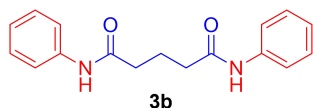

Following general procedure A, the title compound **3b** was obtained as a yellow solid with a 94% yield (26.5 mg, m.p. 200-201 °C). <sup>1</sup>H NMR (400 MHz, DMSO-*d*<sub>6</sub>) δ 1.92 (p, *J* = 7.2 Hz, 2H), 2.38 (t, *J* = 7.2 Hz, 4H), 7.02 (t, *J* = 7.2 Hz, 2H), 7.28 (t, *J* = 8.0 Hz, 4H), 7.60 (ABd, *J* = 8.0 Hz, 4H), 9.90 (s, 2H); <sup>13</sup>C NMR (100 MHz, DMSO-*d*<sub>6</sub>) δ 170.79, 139.32, 128.63, 122.95, 119.04, 35.57, 20.92; HRMS (ESI): Exact mass calcd for C<sub>17</sub>H<sub>18</sub>N<sub>2</sub>O<sub>2</sub>Na [M+Na]<sup>+</sup>: 305.1266, Found: 305.1260.

*N*<sup>1</sup>,*N*<sup>5</sup>-bis(4-methoxyphenyl)glutaramide (**3c**):

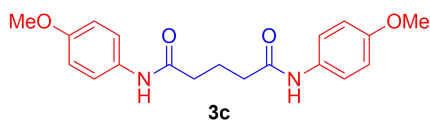

Following general procedure A, the title compound **3c** was obtained as a yellow solid with a 84% yield (28.7 mg, m.p. 160-161 °C). <sup>1</sup>H NMR (400 MHz, DMSO-*d*<sub>6</sub>) δ 1.89 (p, *J* = 7.2 Hz, 2H), 2.33 (t, *J* = 7.6 Hz, 4H), 3.43 (s, 6H), 6.86 (d, *J* = 7.6 Hz, 4H), 7.50 (ABd, *J* = 7.6 Hz, 4H), 9.78 (s, 2H); <sup>13</sup>C NMR (100 MHz, DMSO-*d*<sub>6</sub>) δ 170.40, 155.08, 132.57, 120.67, 113.83, 55.20, 35.54, 21.19; HRMS (ESI): Exact mass calcd for C<sub>19</sub>H<sub>22</sub>N<sub>2</sub>O<sub>4</sub>Na [M+Na]<sup>+</sup>: 365.1478, Found: 365.1472.

*N*<sup>1</sup>,*N*<sup>5</sup>-bis(4-fluorophenyl)glutaramide (**3d**):

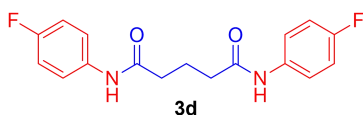

Following general procedure A, the title compound **3d** was obtained as a yellow solid with a 81% yield (25.8 mg, m.p. 137-138 °C). <sup>1</sup>H NMR (400 MHz, DMSO-*d*<sub>6</sub>) δ 1.89 (p, *J* = 7.2 Hz, 2H), 2.35 (t, *J* = 7.2 Hz, 4H), 7.07-7.15 (m, 4H), 7.58-7.61 (m, 4H), 9.99 (s, 2H); <sup>13</sup>C NMR (100 MHz, DMSO-*d*<sub>6</sub>) δ 171.00, 158.06 (d, *J* = 238 Hz), 135.80 (d, *J* = 2.6 Hz), 121.03 (d, *J* = 7.7 Hz), 115.40 (d, *J* = 22 Hz), 35.61, 21.10; HRMS (ESI): Exact mass calcd for C<sub>17</sub>H<sub>16</sub>F<sub>2</sub>N<sub>2</sub>O<sub>2</sub>Na [M+Na]<sup>+</sup>: 341.1078, Found: 341.1072.

*N*<sup>1</sup>,*N*<sup>5</sup>-bis(4-chlorophenyl)glutaramide (**3e**):

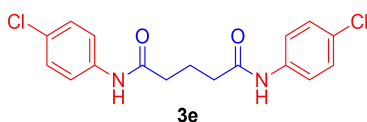

Following general procedure A, the title compound **3e** was obtained as a yellow solid with a 64% yield (22.4 mg, m.p. 144-145 °C). <sup>1</sup>H NMR (400 MHz, DMSO-*d*<sub>6</sub>) δ 1.90 (p, *J* = 7.2 Hz, 2H), 2.38 (t, *J* = 7.6 Hz, 4H), 7.33 (ABd, *J* = 8.8 Hz, 4H), 7.63 (ABd, *J* = 8.8 Hz, 4H), 10.04 (s, 2H); <sup>13</sup>C NMR (100 MHz, DMSO-*d*<sub>6</sub>) δ 171.24, 138.33, 128.76, 126.78, 120.81, 35.66, 20.93; HRMS (ESI): Exact mass calcd for C<sub>17</sub>H<sub>16</sub>Cl<sub>2</sub>N<sub>2</sub>O<sub>2</sub>Na [M+Na]<sup>+</sup>: 373.0487, Found: 373.0481.

*N*<sup>1</sup>,*N*<sup>5</sup>-bis(4-bromophenyl)glutaramide (**3f**):

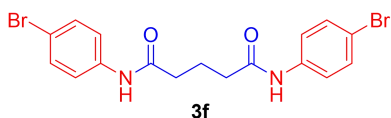

Following general procedure A, the title compound **3f** was obtained as a yellow solid with a 66% yield (28.8 mg, m.p. 182-183 °C). <sup>1</sup>H NMR (400 MHz, DMSO-*d*<sub>6</sub>) δ 1.88 (p, *J* = 7.2 Hz, 2H), 2.36 (t, *J* = 7.2 Hz, 4H), 7.45

(ABd, *J* = 8.8 Hz, 4H), 7.56 (ABd, *J* = 8.8 Hz, 4H), 10.07 (s, 2H); <sup>13</sup>C NMR (100 MHz, DMSO-*d*<sub>6</sub>) δ 171.24, 138.74, 131.64, 121.17, 114.74, 35.66, 20.88; HRMS (ESI): Exact mass calcd for C<sub>17</sub>H<sub>16</sub>Br<sub>2</sub>N<sub>2</sub>O<sub>2</sub>Na [M+Na]<sup>+</sup>: 460.9477, Found: 460.9471.

*N*<sup>1</sup>,*N*<sup>5</sup>-bis(3-bromophenyl)glutaramide (**3g**):

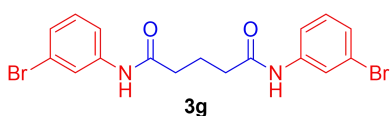

Following general procedure A, the title compound **3g** was obtained as a yellow solid with a 63% yield (27.5 mg, m.p. 167-168 °C). <sup>1</sup>H NMR (400 MHz, DMSO-*d*<sub>6</sub>) δ 1.90 (p, *J* = 7.2 Hz, 2H), 2.38 (t, *J* = 7.2 Hz, 4H),

7.19-7.27 (m, 4H), 7.46-7.49 (m, 2H), 7.98 (t, *J* = 2.0 Hz, 2H), 10.09 (s, 2H); <sup>13</sup>C NMR (100 MHz, DMSO-*d*<sub>6</sub>) δ 171.19, 140.87, 130.71, 125.61, 121.55, 121.37, 117.62, 35.47, 20.65; HRMS (ESI): Exact mass calcd for C<sub>17</sub>H<sub>16</sub>Br<sub>2</sub>N<sub>2</sub>O<sub>2</sub>Na [M+Na]<sup>+</sup>: 460.9477, Found: 460.9471.

*N*<sup>1</sup>,*N*<sup>5</sup>-bis(4-nitrophenyl)glutaramide (**3h**):

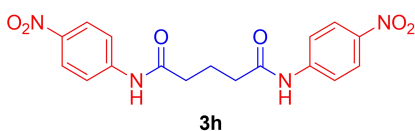

Following general procedure A, the title compound **3h** was obtained as a yellow solid with a 57% yield (21.2 mg, m.p. 140-141 °C). <sup>1</sup>H NMR (400 MHz, DMSO-*d*<sub>6</sub>) δ 1.94 (p, *J* = 7.2 Hz, 2H), 2.48 (t, *J* = 7.2 Hz, 4H),

7.84 (ABd, *J* = 9.2 Hz, 4H), 8.21 (ABd, *J* = 9.2 Hz, 4H), 10.55 (s, 2H); <sup>13</sup>C NMR (100 MHz, DMSO-*d*<sub>6</sub>) δ 171.79, 145.41, 141.99, 124.98, 118.63, 35.54, 20.26; HRMS (ESI): Exact mass calcd for C<sub>17</sub>H<sub>16</sub>N<sub>4</sub>O<sub>6</sub>Na [M+Na]<sup>+</sup>: 395.0968, Found: 395.0962.

*N*<sup>1</sup>,*N*<sup>5</sup>-bis(4-cyanophenyl)glutaramide (**3i**):

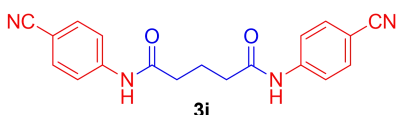

Following general procedure A, the title compound **3i** was obtained as a yellow solid with a 52% yield (17.3 mg, m.p. 178-179 °C). <sup>1</sup>H NMR (400 MHz, DMSO-*d*<sub>6</sub>) δ 1.91 (p, *J* = 7.2 Hz, 2H), 2.43 (t, *J* = 7.2 Hz, 4H),

7.74-7.79 (m, 8H), 10.35 (s, 2H); <sup>13</sup>C NMR (100 MHz, DMSO-*d*<sub>6</sub>) δ 171.68, 143.47, 133.29, 119.15, 119.03, 104.71, 35.56, 20.37; HRMS (ESI): Exact mass calcd for C<sub>19</sub>H<sub>16</sub>N<sub>4</sub>O<sub>2</sub>Na [M+Na]<sup>+</sup>: 355.1171, Found: 355.1165.

*N*<sup>1</sup>,*N*<sup>5</sup>-bis(4-(trifluoromethyl)phenyl)glutaramide (**3j**):

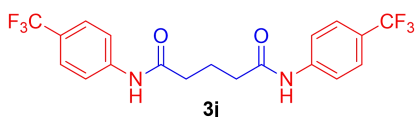

Following general procedure A, the title compound **3j** was obtained as a yellow solid with a 50% yield (20.9 mg, m.p. 202-203 °C). <sup>1</sup>H NMR (400 MHz, DMSO-*d*<sub>6</sub>) δ 1.93 (p, *J* = 7.2 Hz, 2H), 2.43 (t, *J* = 7.2 Hz, 4H),

7.65 (ABd, *J* = 8.4 Hz, 4H), 7.80 (ABd, *J* = 8.4 Hz, 4H), 10.30 (s, 2H); <sup>13</sup>C NMR (100 MHz, DMSO-*d*<sub>6</sub>) δ 171.51, 142.85, 126.04 (q, *J* = 3.8 Hz), 124.44 (q, *J* = 269 Hz), 123.01 (q, *J* = 32 Hz), 118.87, 35.54, 20.53; HRMS (ESI): Exact mass calcd for C<sub>19</sub>H<sub>16</sub>F<sub>6</sub>N<sub>2</sub>O<sub>2</sub>Na [M+Na]<sup>+</sup>: 441.1014, Found: 441.1008.

*N*<sup>1</sup>-(2,6-diisopropylphenyl)-*N*<sup>5</sup>-phenylglutaramide (**3m**):

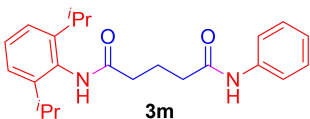

Following general procedure B, the title compound **3m** was obtained as a white solid with a 58% yield (21.2 mg, m.p. 179-180 °C). <sup>1</sup>H NMR (400 MHz, DMSO-*d*<sub>6</sub>)

δ 1.11 (d, *J* = 6.4 Hz, 12H), 1.93 (p, *J* = 7.2 Hz, 2H), 2.39-2.43 (m, 4H), 3.04 (sep, *J* = 6.8 Hz, 2H), 7.02 (t, *J* = 7.6 Hz, 1H), 7.13 (ABd, *J* = 7.6 Hz, 2H), 7.21-7.25 (m, 1H), 7.29 (t, *J* = 8.0 Hz, 2H), 7.61 (ABd, *J* = 7.6 Hz, 2H), 9.18 (s, 1H), 9.92 (s, 1H); <sup>13</sup>C NMR (100 MHz, DMSO-*d*<sub>6</sub>) δ 171.57, 170.84, 145.95, 139.33, 132.68, 128.65, 127.34, 122.96, 122.76, 119.06, 35.81, 34.72, 28.00, 23.64, 23.25, 21.46; HRMS (ESI): Exact mass calcd for C<sub>23</sub>H<sub>30</sub>N<sub>2</sub>O<sub>2</sub>Na [M+Na]<sup>+</sup>: 389.2205, Found: 389.2211.

*N*<sup>1</sup>-(2,6-diisopropylphenyl)-*N*<sup>5</sup>-(*p*-tolyl)glutaramide (**3n**):

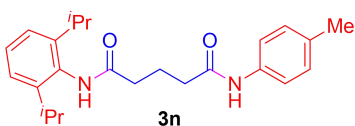

Following general procedure B, the title compound **3n** was obtained as a white solid with a 61% yield (23.2 mg, m.p. 109-110 °C). <sup>1</sup>H NMR (500 MHz, DMSO-*d*<sub>6</sub>) δ 1.11 (d, *J* = 3.0 Hz, 12H), 1.92 (p, *J* = 7.0 Hz, 2H), 2.24 (s, 3H),

2.37-2.41 (m, 4H), 3.04 (sep, *J* = 7.0 Hz, 2H), 7.09 (d, *J* = 8.0 Hz, 2H), 7.13 (ABd, *J* = 7.5 Hz, 2H), 7.23 (t, *J* = 8.0 Hz, 1H), 7.49 (ABd, *J* = 8.5 Hz, 2H), 9.18 (s, 1H), 9.82 (s, 1H); <sup>13</sup>C NMR (125 MHz, CDCl<sub>3</sub>) δ 171.56, 170.56, 145.94, 136.83, 132.68, 131.79, 129.00, 127.32, 122.74, 119.08, 35.76, 34.74, 27.99, 23.63, 23.23, 21.48, 20.43; HRMS (ESI): Exact mass calcd for C<sub>24</sub>H<sub>32</sub>N<sub>2</sub>O<sub>2</sub>Na [M+Na]<sup>+</sup>: 403.2362, Found: 403.2368.

*N*<sup>1</sup>-(2,6-diisopropylphenyl)-*N*<sup>5</sup>-(4-chlorophenyl)glutaramide (**3o**):

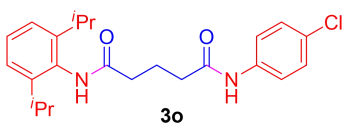

Following general procedure B, the title compound **3o** was obtained as a white solid with a 54% yield (21.6 mg, m.p. 247-248 °C). <sup>1</sup>H NMR (500 MHz, DMSO-*d*<sub>6</sub>) δ 1.11 (d, *J* = 6.0 Hz, 12H), 1.94 (p, *J* = 7.5 Hz, 2H), 2.40-2.44 (m,

4H), 3.04 (sep, *J* = 7.0 Hz, 2H), 7.13 (ABd, *J* = 7.5 Hz, 2H), 7.23 (t, *J* = 7.5 Hz, 1H), 7.35 (ABd, *J* = 9.0 Hz, 2H),

7.66 (ABd,  $J = 8.5$  Hz, 2H), 9.19 (s, 1H), 10.07 (s, 1H);  $^{13}\text{C}$  NMR (125 MHz, DMSO- $d_6$ )  $\delta$  171.53, 170.99, 145.93, 138.27, 132.67, 128.54, 127.33, 126.49, 122.74, 120.57, 35.77, 34.66, 27.99, 23.63, 23.23, 21.33; HRMS (ESI): Exact mass calcd for  $\text{C}_{23}\text{H}_{29}\text{ClN}_2\text{O}_2\text{Na}$   $[\text{M}+\text{Na}]^+$ : 423.1816, Found: 423.1822.

### 2-oxo-*N*-(*p*-tolyl)cyclopentanecarboxamide (**3s**):

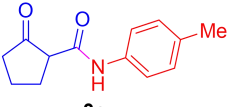  
Compound **3s** was obtained as a white solid with a 79% yield (17.1 mg).  $^1\text{H}$  NMR (400 MHz,  $\text{CDCl}_3$ )  $\delta$  1.81-1.88 (m, 1H), 2.03-2.12 (m, 1H), 2.30 (s, 3H), 2.34-2.46 (m, 4H), 3.13 (t,  $J = 9.2$  Hz, 1H), 7.11 (d,  $J = 8.0$  Hz, 2H), 7.42 (d,  $J = 8.0$  Hz, 2H), 8.69 (s, 1H);  $^{13}\text{C}$  NMR (100 MHz,  $\text{CDCl}_3$ )  $\delta$  216.96, 164.38, 135.07, 133.81, 129.37, 119.79, 54.58, 39.03, 25.68, 20.80, 20.16; HRMS (ESI): Exact mass calcd for  $\text{C}_{13}\text{H}_{15}\text{NO}_2$   $[\text{M} + \text{Na}]^+$ : 240.1003, Found: 240.1001.

### 3. General procedure and spectral data of products **5**.

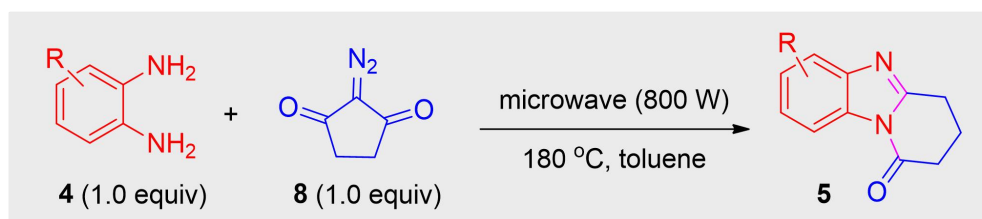

**General Procedure:** *Ortho*-phenylenediamine **4** (0.10 mmol) was added to a solution of 2-diazocyclopentane-1,3-dione **8** (0.10 mmol) in toluene (1.0 mL), the resulting mixture was subjected to microwave irradiation at a temperature of 180 °C for 1 h (800 W). After completion of the reaction, the mixture was cooled to room temperature. The solvent was removed under vacuum, and the residue was purified by column chromatography using petroleum ether/EtOAc (3:1 to 1:1) as the eluent to afford the piperidino[1,2-*a*]benzimidazol-1-ones **5**.

### 3,4-dihydrobenzo[4,5]imidazo[1,2-*a*]pyridin-1(2H)-one (**5a**):

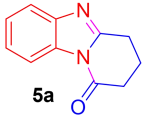  
Following the general procedure, the title compound **5a** was obtained as a yellow solid with a 62% yield (11.5 mg, m.p. 86-87 °C).  $^1\text{H}$  NMR (400 MHz,  $\text{CDCl}_3$ )  $\delta$  2.23 (p,  $J = 6.8$  Hz, 2H), 2.88 (t,  $J = 6.8$  Hz, 2H), 3.19 (t,  $J = 6.4$  Hz, 2H), 7.33-7.38 (m, 2H), 7.67-7.69 (m, 1H), 8.20-8.24 (m, 1H);  $^{13}\text{C}$  NMR (100 MHz,  $\text{CDCl}_3$ )  $\delta$  168.86, 154.13, 142.52, 131.16, 125.21, 124.95, 119.27, 115.35, 33.75, 25.16, 20.42; HRMS (ESI): Exact mass calcd for  $\text{C}_{11}\text{H}_{11}\text{N}_2\text{O}$   $[\text{M}+\text{H}]^+$ : 187.0871, Found: 187.0865.

7,8-dimethyl-3,4-dihydrobenzo[4,5]imidazo[1,2-a]pyridin-1(2H)-one (**5b**):

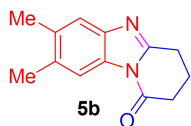

Following the general procedure, the title compound **5b** was obtained as a yellow solid with a 54% yield (11.6 mg, m.p. 182-183 °C). <sup>1</sup>H NMR (400 MHz, CDCl<sub>3</sub>) δ 2.19 (p, *J* = 6.4 Hz, 2H), 2.35 (s, 3H), 2.36 (s, 3H), 2.83 (t, *J* = 6.8 Hz, 2H), 3.13 (t, *J* = 6.4 Hz, 2H), 7.40 (s, 1H), 7.97 (s, 1H); <sup>13</sup>C NMR (100 MHz, CDCl<sub>3</sub>) δ 168.80, 153.25, 140.91, 133.94, 129.43, 119.40, 115.60, 33.69, 25.11, 20.45, 20.30, 20.28; HRMS (ESI): Exact mass calcd for C<sub>13</sub>H<sub>15</sub>N<sub>2</sub>O [M+H]<sup>+</sup>: 215.1184, Found: 215.1179.

7,8-dichloro-3,4-dihydrobenzo[4,5]imidazo[1,2-a]pyridin-1(2H)-one (**5c**):

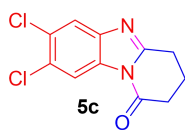

Following the general procedure, the title compound **5c** was obtained as a yellow solid with a 42% yield (10.7 mg, m.p. 129-130 °C). <sup>1</sup>H NMR (400 MHz, CDCl<sub>3</sub>) δ 2.24 (p, *J* = 6.4 Hz, 2H), 2.88 (t, *J* = 6.4 Hz, 2H), 3.18 (t, *J* = 6.4 Hz, 2H), 7.74 (s, 1H), 8.33 (s, 1H); <sup>13</sup>C NMR (100 MHz, CDCl<sub>3</sub>) δ 168.42, 155.96, 141.87, 130.13, 129.23, 128.93, 120.53, 116.73, 33.48, 25.08, 20.20; HRMS (ESI): Exact mass calcd for C<sub>11</sub>H<sub>9</sub>Cl<sub>2</sub>N<sub>2</sub>O [M+H]<sup>+</sup>: 255.0092, Found: 255.0087.

7,8-dibromo-3,4-dihydrobenzo[4,5]imidazo[1,2-a]pyridin-1(2H)-one (**5d**):

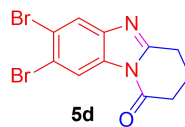

Following the general procedure, the title compound **5d** was obtained as a yellow solid with a 45% yield (15.4 mg, m.p. 159-160 °C). <sup>1</sup>H NMR (400 MHz, CDCl<sub>3</sub>) δ 2.24 (p, *J* = 6.4 Hz, 2H), 2.88 (t, *J* = 6.8 Hz, 2H), 3.17 (t, *J* = 6.4 Hz, 2H), 7.92 (s, 1H), 8.51 (s, 1H); <sup>13</sup>C NMR (100 MHz, CDCl<sub>3</sub>) δ 168.40, 155.84, 142.77, 131.00, 123.77, 120.73, 120.41, 119.79, 33.51, 25.07, 20.19; HRMS (ESI): Exact mass calcd for C<sub>11</sub>H<sub>9</sub>Br<sub>2</sub>N<sub>2</sub>O [M+H]<sup>+</sup>: 342.9081, Found: 342.9065.

3,4-dihydronaphtho[2',3':4,5]imidazo[1,2-a]pyridin-1(2H)-one (**5e**):

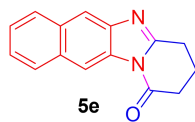

Following the general procedure, the title compound **5e** was obtained as a yellow solid with a 66% yield (15.6 mg, m.p. 169-170 °C). <sup>1</sup>H NMR (400 MHz, CDCl<sub>3</sub>) δ 2.22 (p, *J* = 6.4 Hz, 2H), 2.87 (t, *J* = 6.0 Hz, 2H), 3.19 (t, *J* = 6.4 Hz, 2H), 7.45-7.49 (m, 2H), 7.93-8.00 (m, 2H), 8.07 (s, 1H), 8.65 (s, 1H); <sup>13</sup>C NMR (100 MHz, CDCl<sub>3</sub>) δ 168.45, 157.05, 141.86, 131.55, 130.64, 128.41, 128.32, 125.20, 125.03, 116.42, 112.73, 33.57, 25.37, 20.03; HRMS (ESI): Exact mass calcd for C<sub>15</sub>H<sub>13</sub>N<sub>2</sub>O [M+H]<sup>+</sup>: 237.1028, Found: 237.1022.



6-chloro-3,4-dihydrobenzo[4,5]imidazo[1,2-a]pyridin-1(2H)-one (**5f**):

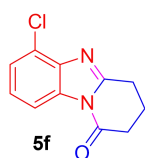

Following the general procedure, the title compound **5f** was obtained as a yellow solid with a 31% yield (6.8 mg, m.p. 138-139 °C). <sup>1</sup>H NMR (400 MHz, CDCl<sub>3</sub>) δ 2.21 (p, *J* = 6.4 Hz, 2H), 2.85 (t, *J* = 6.8 Hz, 2H), 3.20 (t, *J* = 6.4 Hz, 2H), 7.23 (t, *J* = 4.4 Hz, 1H), 7.34 (dd, *J* = 8.0, 0.8 Hz, 1H), 8.09 (dd, *J* = 8.0, 0.8 Hz, 1H); <sup>13</sup>C NMR (100 MHz, CDCl<sub>3</sub>) δ 168.76, 154.94, 139.77, 132.20, 125.64, 125.25, 124.18, 113.95, 33.65, 25.19, 20.28; HRMS (ESI): Exact mass calcd for C<sub>11</sub>H<sub>10</sub>ClN<sub>2</sub>O [M+H]<sup>+</sup>: 221.0481, Found: 221.0476.

9-chloro-3,4-dihydrobenzo[4,5]imidazo[1,2-a]pyridin-1(2H)-one (**5g**):

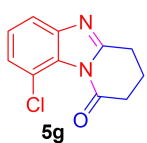

Following the general procedure, the title compound **5g** was obtained as a yellow oil with a 19% yield (4.2 mg). <sup>1</sup>H NMR (500 MHz, CDCl<sub>3</sub>) δ 2.23 (p, *J* = 6.0 Hz, 2H), 2.93 (t, *J* = 6.5 Hz, 2H), 3.20 (t, *J* = 6.5 Hz, 2H), 7.29 (t, *J* = 8.0 Hz, 1H), 7.37 (dd, *J* = 8.0, 1.0 Hz, 1H), 7.58 (d, *J* = 8.0 Hz, 1H); <sup>13</sup>C NMR (125 MHz, CDCl<sub>3</sub>) δ 166.61, 156.29, 145.55, 129.30, 127.34, 126.16, 120.35, 118.05, 34.48, 25.82, 19.96; HRMS (ESI): Exact mass calcd for C<sub>11</sub>H<sub>10</sub>ClN<sub>2</sub>O [M+H]<sup>+</sup>: 221.0481, Found: 221.0476.

#### 4. General procedure and spectral data of products 7.

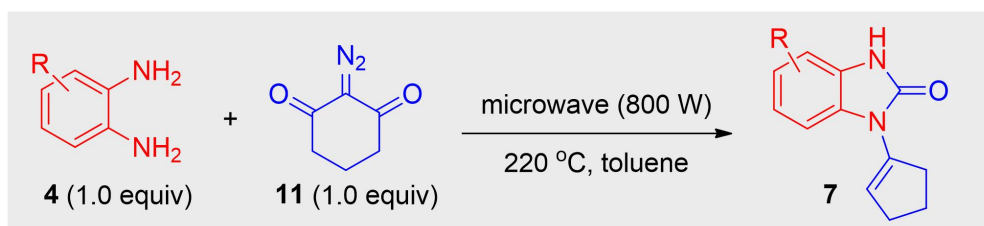

**General Procedure:** *Ortho*-phenylenediamine **4** (0.10 mmol) was added to a solution of 2-diazocyclohexane-1,3-dione **11** (0.10 mmol) in toluene (1.0 mL), the resulting mixture was subjected to microwave irradiation at a temperature of 220 °C for 1 h (800 W). After completion of the reaction, the mixture was cooled to room temperature. The solvent was removed under vacuum, and the residue was purified by column chromatography using petroleum ether/EtOAc (3:1 to 1:1) as the eluent to afford the *N*-cyclopentyl benzimidazolones **7**.

1-(cyclopent-1-en-1-yl)-1H-benzo[d]imidazol-2(3H)-one (**7a**):

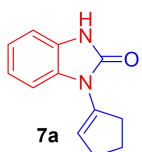

Following the general procedure, the title compound **7a** was obtained as a brown solid with a 73% yield (14.6 mg, m.p. 143-144 °C). <sup>1</sup>H NMR (400 MHz, CDCl<sub>3</sub>) δ 2.11 (p, *J* = 7.6 Hz, 2H), 2.56-2.61 (m, 2H), 2.87-2.92 (m, 2H), 5.98 (p, *J* = 2.4 Hz, 1H), 7.06-7.16 (m, 4H), 10.06 (s, 1H); <sup>13</sup>C NMR (100 MHz, CDCl<sub>3</sub>) δ 154.58, 135.84, 130.04, 128.19, 123.59, 121.88, 121.29, 109.71,

109.60, 32.01, 30.48, 22.22; HRMS (ESI): Exact mass calcd for C<sub>12</sub>H<sub>12</sub>N<sub>2</sub>ONa [M+Na]<sup>+</sup>: 223.0848, Found: 223.0842.

1-(cyclopent-1-en-1-yl)-5,6-dimethyl-1H-benzo[d]imidazol-2(3H)-one (**7b**):

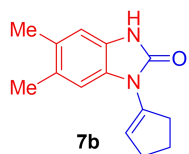

Following the general procedure, the title compound **7b** was obtained as a white solid with a 57% yield (13 mg, m.p. 219-220 °C). <sup>1</sup>H NMR (400 MHz, CDCl<sub>3</sub>) δ 2.11 (p, *J* = 7.6 Hz, 2H), 2.27 (s, 3H), 2.29 (s, 3H), 2.57-2.61 (m, 2H), 2.89-2.94 (m, 2H), 5.97 (t, *J* = 2.0 Hz, 1H), 6.93 (s, 2H), 10.64 (s, 1H); <sup>13</sup>C NMR (100 MHz, CDCl<sub>3</sub>) δ 154.93, 136.12, 130.00, 129.21, 128.08, 126.44, 122.70, 110.90, 110.57, 32.03, 30.43, 22.19, 19.95, 19.70; HRMS (ESI): Exact mass calcd for C<sub>14</sub>H<sub>16</sub>N<sub>2</sub>ONa [M+Na]<sup>+</sup>: 251.1161, Found: 251.1160.

5,6-dibromo-1-(cyclopent-1-en-1-yl)-1H-benzo[d]imidazol-2(3H)-one (**7c**):

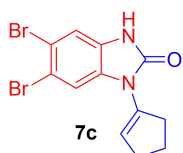

Following the general procedure, the title compound **7c** was obtained as a white solid with a 49% yield (17.4 mg, m.p. 239-240 °C). <sup>1</sup>H NMR (400 MHz, DMSO-*d*<sub>6</sub>) δ 1.96 (p, *J* = 7.6 Hz, 2H), 2.44-2.48 (m, 2H), 2.73-2.78 (m, 2H), 5.95 (p, *J* = 2.0 Hz, 1H), 7.30 (s, 1H), 7.44 (s, 1H), 11.32 (s, 1H); <sup>13</sup>C NMR (100 MHz, DMSO-*d*<sub>6</sub>) δ 152.52, 135.06, 130.19, 129.43, 122.27, 115.13, 114.50, 113.45, 113.10, 31.41, 30.00, 21.63; HRMS (ESI): Exact mass calcd for C<sub>12</sub>H<sub>10</sub>Br<sub>2</sub>N<sub>2</sub>ONa [M+Na]<sup>+</sup>: 378.9058, Found: 378.9052.

5-chloro-1-(cyclopent-1-en-1-yl)-1H-benzo[d]imidazol-2(3H)-one (**7d**):

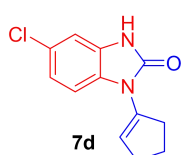

Following the general procedure, the title compound **7d** was obtained as a white solid with a 15% yield (3.51 mg, m.p. 195-196 °C). <sup>1</sup>H NMR (400 MHz, CDCl<sub>3</sub>) δ 2.11 (p, *J* = 7.6 Hz, 2H), 2.55-2.60 (m, 2H), 2.85-2.89 (m, 2H), 5.96 (p, *J* = 2.0 Hz, 1H), 7.02-7.06 (m, 2H), 7.12 (s, 1H), 10.35 (s, 1H); <sup>13</sup>C NMR (125 MHz, DMSO-*d*<sub>6</sub>) δ 152.72, 135.49, 129.74, 128.34, 125.62, 120.90, 120.44, 110.55, 108.79, 31.55, 29.94, 21.65; HRMS (ESI): Exact mass calcd for C<sub>12</sub>H<sub>11</sub>ClN<sub>2</sub>ONa [M+Na]<sup>+</sup>: 257.0458, Found: 257.0464.

6-chloro-1-(cyclopent-1-en-1-yl)-1H-benzo[d]imidazol-2(3H)-one (**7e**):

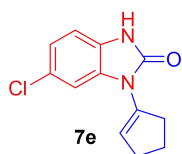

Following the general procedure, the title compound **7e** was obtained as a white solid with a 37% yield (8.7 mg, m.p. 219-220 °C). <sup>1</sup>H NMR (400 MHz, CDCl<sub>3</sub>) δ 2.11 (p, *J* = 7.6 Hz, 2H), 2.56-2.61 (m, 2H), 2.84-2.88 (m, 2H), 5.97 (p, *J* = 2.0 Hz, 1H), 7.01-7.06 (m, 2H), 7.12

(s, 1H), 10.74 (s, 1H);  $^{13}\text{C}$  NMR (125 MHz,  $\text{CDCl}_3$ )  $\delta$  154.81, 135.42, 130.74, 126.89, 126.84, 124.46, 121.91, 110.51, 109.96, 31.93, 30.47, 22.17; HRMS (ESI): Exact mass calcd for  $\text{C}_{12}\text{H}_{11}\text{ClN}_2\text{O}_2\text{Na}$   $[\text{M}+\text{Na}]^+$ : 257.0458, Found: 257.0464.

## 5. Scale-up synthesis and further transformations of the products.

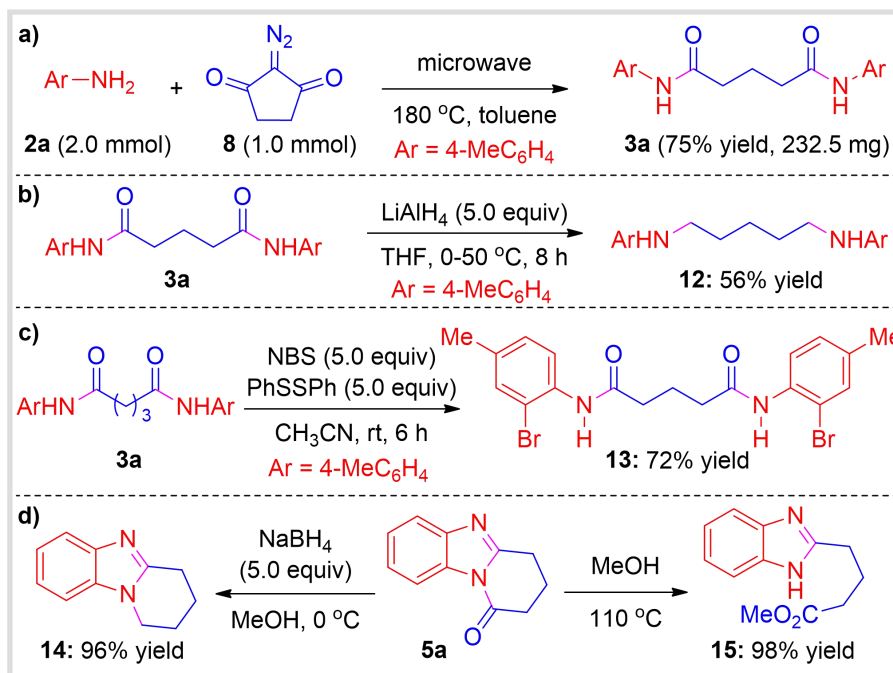

**Scale-up synthesis of 3a:** *p*-toluidine **2a** (2.0 mmol) was added to a solution of 2-diazocyclopentane-1,3-dione **8** (1.0 mmol) in toluene (6.0 mL), the resulting mixture was subjected to microwave irradiation at a temperature of 180 °C for 1 h (800 W), after which the reaction mixture was cooled to room temperature. After removal of the solvent under vacuum, the residue was purified by column chromatography using petroleum ether/EtOAc (v/v = 1:1) as the eluent to afford the *N*<sup>1</sup>, *N*<sup>5</sup>-di(*p*-tolyl)-glutaramide **3a** with 75% yield (232.5 mg).

**The preparation of 12:** Under  $\text{N}_2$  atmosphere, **3a** (31 mg, 0.10 mmol) and dry THF (2.0 mL) were added to an oven-dried 10 mL Schlenk tube. Subsequently,  $\text{LiAlH}_4$  (19 mg, 0.5 mmol) was added in three portions to the reaction mixture at 0 °C. The reaction was stirred at 50 °C for 2 h. After the full consumption of **3a** (monitored by TLC), saturated  $\text{NH}_4\text{Cl}$  aqueous solution was added to quench the reaction. The resulting solution was extracted with ethyl acetate (8 mL  $\times$  3), the combined organic layer was dried over  $\text{Na}_2\text{SO}_4$  and concentrated in vacuo. The residue was purified by column chromatography using petroleum ether/EtOAc (v/v = 2:1) as the eluent to afford the desired product **12** in 56 % yield as a pink solid (15.8 mg, m.p. 59-60 °C).

*N*<sup>1</sup>,*N*<sup>5</sup>-di-*p*-tolylpentane-1,5-diamine (**12**):

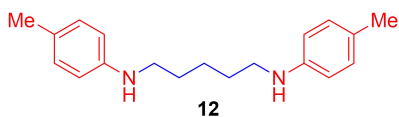

<sup>1</sup>H NMR (400 MHz, CDCl<sub>3</sub>) δ 1.49-1.57 (m, 2H), 1.68 (p, *J* = 7.6 Hz, 4H), 2.28 (s, 6H), 3.14 (t, *J* = 6.8 Hz, 6H), 6.57 (ABd, *J* = 8.0 Hz, 4H), 7.03 (ABd, *J* = 8.4 Hz, 4H); <sup>13</sup>C NMR (100 MHz, CDCl<sub>3</sub>) δ 146.05, 129.67,

126.39, 112.91, 44.21, 29.36, 24.69, 20.33; HRMS (ESI): Exact mass calcd for C<sub>19</sub>H<sub>27</sub>N<sub>2</sub> [M+H]<sup>+</sup>: 283.2174, Found: 283.2169.

**The preparation of 13:** Under N<sub>2</sub> atmosphere, **3a** (31.0 mg, 0.10 mmol), PhSSPh (109 mg, 0.50 mmol), dry CH<sub>3</sub>CN (2 mL) and NBS (89 mg, 0.5 mmol) were successively added to an oven-dried 10 mL Schlenk tube. The reaction mixture was allowed to stir at room temperature for 4 h. After the full consumption of **3a** (monitored by TLC), saturated NaHCO<sub>3</sub> and Na<sub>2</sub>S<sub>2</sub>O<sub>3</sub> (v/v = 1:1) aqueous solution was added to quench the reaction. The resulting mixture was extracted with ethyl acetate (8 mL × 3), and the combined organic layer was washed with brine, dried over Na<sub>2</sub>SO<sub>4</sub> and concentrated in vacuo. The residue was purified by column chromatography using petroleum ether/EtOAc (v/v = 1:1) as the eluent to afford the desired product **13** in 72% yield as a white solid (33.5 mg, m.p. 184-185 °C).

*N*<sup>1</sup>,*N*<sup>5</sup>-bis(2-bromo-4-methylphenyl)glutaramide (**13**):

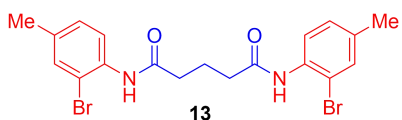

<sup>1</sup>H NMR (400 MHz, DMSO-*d*<sub>6</sub>) δ 1.91 (p, *J* = 7.2 Hz, 2H), 2.28 (s, 6H), 2.41 (t, *J* = 6.8 Hz, 4H), 7.16 (dd, *J* = 8.0, 1.2 Hz, 2H), 7.41 (ABd, *J* = 8.0 Hz, 2H), 7.47 (s, 2H), 9.38 (s, 2H); <sup>13</sup>C NMR (100 MHz, DMSO-*d*<sub>6</sub>) δ

171.05, 136.86, 133.77, 132.67, 128.56, 127.43, 118.41, 34.98, 20.10; HRMS (ESI): Exact mass calcd for C<sub>19</sub>H<sub>20</sub>Br<sub>2</sub>N<sub>2</sub>O<sub>2</sub>Na [M+Na]<sup>+</sup>: 488.9790, Found: 488.9784.

**The preparation of 14:** Under N<sub>2</sub> atmosphere, **5a** (55.8 mg, 0.30 mmol) and MeOH (3 mL) were added to an oven-dried 10 mL Schlenk tube. Subsequently, NaBH<sub>4</sub> (57 mg, 1.5 mmol) was added in three portions to the reaction mixture at 0 °C. The reaction mixture was stirred at 0 °C for 3 h. After the full consumption of **5a** (monitored by TLC), saturated NH<sub>4</sub>Cl aqueous solution was added to quench the reaction. The resulting solution was extracted with ethyl acetate (20 mL × 3), the combined organic layer was dried over Na<sub>2</sub>SO<sub>4</sub> and concentrated in vacuo. The residue was purified by column chromatography using DCM/MeOH (v/v = 20:1) as the eluent to afford the desired product **14** in 96 % yield as a yellow solid (49.5 mg, m.p. 113-114 °C).

1,2,3,4-tetrahydrobenzo[4,5]imidazo[1,2-a]pyridine (**14**):

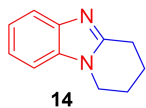

**14**

$^1\text{H}$  NMR (400 MHz,  $\text{CD}_3\text{OD}$ )  $\delta$  1.60 (p,  $J$  = 6.8 Hz, 2H), 1.89 (p,  $J$  = 7.6 Hz, 2H), 2.90 (t,  $J$  = 7.6 Hz, 2H), 3.59 (t,  $J$  = 6.4 Hz, 2H), 7.15-7.19 (m, 2H), 7.46-7.50 (m, 2H);  $^{13}\text{C}$  NMR (100 MHz,  $\text{CD}_3\text{OD}$ )  $\delta$  156.70, 139.45, 123.15, 115.27, 62.39, 33.05, 29.47, 25.71; HRMS (ESI): Exact mass calcd for  $\text{C}_{11}\text{H}_{13}\text{N}_2$   $[\text{M}+\text{H}]^+$ : 173.1078, Found: 173.1073.

**The preparation of 15:** **5a** (18.6 mg, 0.10 mmol) and MeOH (3 mL) were added to a 25 mL sealed tube at room temperature. The reaction mixture was stirred at 100 °C for 10 h. After the full consumption of **5a** (monitored by TLC), the solvent was removed under vacuum. The residue was purified by column chromatography using petroleum ether/EtOAc (v/v = 3:2) as the eluent to afford the desired product **15** in 98 % yield as a yellow solid (21.3 mg, m.p. 81-82 °C).

methyl 4-(1*H*-benzo[*d*]imidazol-2-yl)butanoate (**15**):

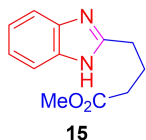

**15**

$^1\text{H}$  NMR (400 MHz,  $\text{DMSO-}d_6$ )  $\delta$  2.03 (p,  $J$  = 7.2 Hz, 2H), 2.41 (t,  $J$  = 7.2 Hz, 2H), 2.84 (t,  $J$  = 7.2 Hz, 2H), 3.58 (s, 3H), 7.10-7.12 (m, 2H), 7.46 (s, 2H), 12.17 (brs, 1H);  $^{13}\text{C}$  NMR (125 MHz,  $\text{DMSO-}d_6$ )  $\delta$  172.96, 154.23, 136.37, 122.55, 114.25, 51.36, 32.54, 27.03, 22.45; HRMS (ESI): Exact mass calcd for  $\text{C}_{12}\text{H}_{15}\text{N}_2\text{O}_2$   $[\text{M}+\text{H}]^+$ : 219.1133 Found: 219.1128.

## 6. Mechanism experiments.

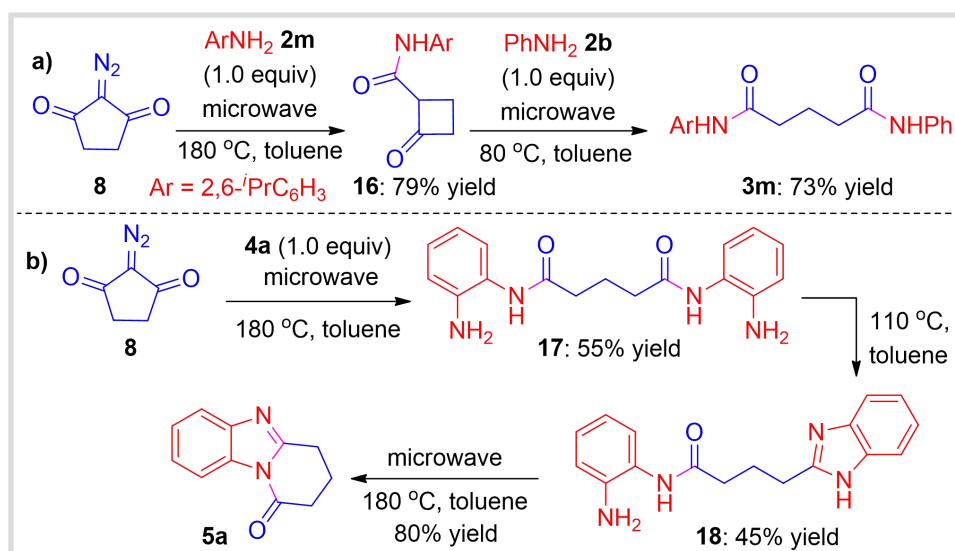

**The preparation of 16:**

2,6-Diisopropylaniline **2m** (0.10 mmol) was added to a solution of 2-diazocyclopentane-1,3-dione **8** (0.10 mmol) in toluene (1.0 mL), the resulting mixture was subjected to microwave irradiation at a

temperature of 180 °C for 1 h (800 W), after which the reaction mixture was cooled to room temperature. After removal of the solvent under vacuum, the residue was purified by column chromatography using petroleum ether/EtOAc (v/v = 4:1) as the eluent to afford the cyclic  $\beta$ -keto amide **16** in 79 % yield as a white solid (21.6 mg, m.p. 194-195 °C).

*N*-(2,6-diisopropylphenyl)-2-oxocyclobutanecarboxamide (**16**):

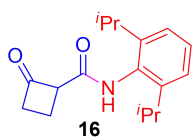

$^1\text{H}$  NMR (500 MHz,  $\text{CDCl}_3$ )  $\delta$  1.16 (d,  $J = 7.0$  Hz, 6H), 1.20 (d,  $J = 7.0$  Hz, 6H), 2.33-2.41 (m, 1H), 2.47-2.54 (m, 1H), 2.99 (p,  $J = 7.0$  Hz, 2H), 3.09-3.16 (m, 1H), 3.20-3.27 (m, 1H), 4.35-4.39 (m, 1H), 7.17 (ABd,  $J = 8.0$  Hz, 2H), 7.29 (t,  $J = 8.0$  Hz, 1H), 7.38 (s, 1H);  $^{13}\text{C}$

NMR (125 MHz,  $\text{CDCl}_3$ )  $\delta$  205.48, 164.78, 145.98, 130.53, 128.38, 123.38, 64.37, 45.66, 28.72, 23.35, 13.63;

HRMS (ESI): Exact mass calcd for  $\text{C}_{17}\text{H}_{23}\text{NO}_2\text{Na}$   $[\text{M}+\text{Na}]^+$ : 296.1627, Found: 296.1633.

**The preparation of 3m:** Aniline **2b** (0.10 mmol) was added to a solution of cyclic  $\beta$ -keto amide **16** (0.10 mmol) in toluene (1.0 mL), the resulting mixture was subjected to microwave irradiation at a temperature of 80 °C for 6 min (800 W), after which the reaction mixture was cooled to room temperature. After removal of the solvent under vacuum, the residue was purified by column chromatography using petroleum ether/EtOAc (v/v = 2:1) as the eluent to afford the desired product **3m** in 73 % yield as a white solid (26.7 mg, m.p. 179-180 °C). The NMR data of compound **3m** are the same as described in page S6.

**The preparation of 17:** Benzene-1,2-diamine **4a** (1.0 mmol) was added to a solution of 2-diazocyclopentane-1,3-dione **8** (1.0 mmol) in toluene (6.0 mL), the resulting mixture was subjected to microwave irradiation at a temperature of 180 °C for 15 min (800 W), after which the reaction mixture was cooled to room temperature. After removal of the solvent under vacuum, the residue was purified by column chromatography using DCM/MeOH (v/v = 12:1) as the eluent to afford the desired product **17** in 55 % yield as a brown solid (171.6 mg, m.p. 183-184 °C).

*N*<sup>1</sup>,*N*<sup>5</sup>-bis(2-aminophenyl)glutaramide (**17**):

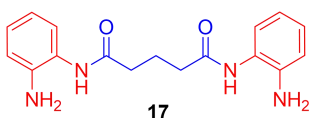

$^1\text{H}$  NMR (400 MHz,  $\text{DMSO-d}_6$ )  $\delta$  1.93 (p,  $J = 7.2$  Hz, 2H), 2.40 (t,  $J = 7.6$  Hz, 4H), 4.84 (s, 4H), 6.55 (t,  $J = 7.6$  Hz, 2H), 6.72 (ABd,  $J = 7.6$  Hz, 2H), 6.90 (t,  $J = 7.2$  Hz, 2H), 7.19 (ABd,  $J = 7.2$  Hz, 2H), 9.14 (s, 2H);  $^{13}\text{C}$  NMR (100 MHz,  $\text{DMSO-d}_6$ )

$\delta$  170.88, 141.98, 125.79, 125.47, 123.50, 116.17, 115.87, 35.12, 21.52; HRMS (ESI): Exact mass calcd for  $\text{C}_{25}\text{H}_{18}\text{N}_3\text{Na}$   $[\text{M}+\text{Na}]^+$ : 335.1484, Found: 335.1490.

**The preparation of 18:** Compound **17** (0.1 mmol) and toluene (1.0 mL) were added to an oven-dried 10 mL microwave tube. The resulting mixture was subjected to microwave irradiation at a temperature of 110 °C for 30 min (800 W). After completion, the reaction mixture was cooled down to room temperature and concentrated in vacuo. The residue was purified by column chromatography using DCM/MeOH (12:1) as the eluent to afford the desired product **18** in 45% yield as a white solid (13.2 mg, m.p. 139-140 °C).

*N*-(2-aminophenyl)-4-(1*H*-benzo[d]imidazol-2-yl)butanamide (**18**):

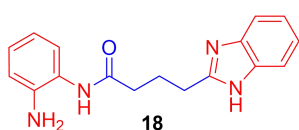

<sup>1</sup>H NMR (500 MHz, DMSO-*d*<sub>6</sub>) δ 1.92 (p, *J* = 7.5 Hz, 2H), 2.38-2.44 (m, 4H), 4.83 (s, 2H), 6.53 (td, *J* = 7.5, 1.0 Hz, 1H), 6.71 (dd, *J* = 8.0, 1.0 Hz, 1H), 6.87-6.91 (m, 1H), 7.12-7.18 (m, 3H), 7.56 (dd, *J* = 5.5, 3.5 Hz, 2H), 9.13 (s, 1H), 9.33 (s, 1H);

<sup>13</sup>C NMR (125 MHz, DMSO-*d*<sub>6</sub>) δ 171.23, 170.86, 141.97, 130.51, 125.80, 125.47, 124.87, 124.68, 123.43, 116.15, 115.85, 35.41, 35.02, 21.29; HRMS (ESI): Exact mass calcd for C<sub>17</sub>H<sub>18</sub>N<sub>4</sub>ONa [M+Na]<sup>+</sup>: 317.1379, Found: 317.1385.

**The preparation of 5a:** Compound **18** (0.045 mmol) and toluene (1.0 mL) were successively added to an oven-dried 10 mL microwave tube. The resulting mixture was subjected to microwave irradiation at a temperature of 180 °C for 30 min (800 W). After completion, the reaction mixture was cooled down to room temperature and concentrated in vacuo. The residue was purified by column chromatography using DCM/MeOH (12:1) as the eluent to afford the desired product **5a** in 80% yield as a white solid (6.7 mg).

## 7. X-Ray crystallographic data for compounds 3a, 5b, 5g, 7a and 7e.

Data intensity of compound **3a** was collected using a Bruker 'Bruker APEX-II CCD' diffractometer at 150.00 (10) K. Data collection and reduction were done by using Olex2 and the structure was solved with the ShelXS structure solution program using direct methods and refined by full-matrix least-squares on  $F^2$  with anisotropic displacement parameters for non-H atoms using SHELX-97. Hydrogen atoms were added at their geometrically ideal positions and refined isotropically (CCDC 2270422).

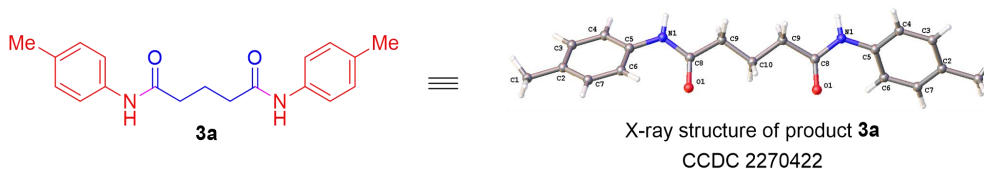

|                                             |                                                               |
|---------------------------------------------|---------------------------------------------------------------|
| Empirical formula                           | C <sub>19</sub> H <sub>22</sub> N <sub>2</sub> O <sub>2</sub> |
| Formula weight                              | 310.38                                                        |
| Temperature/K                               | 150.00 (10)                                                   |
| Crystal system                              | monoclinic                                                    |
| Space group                                 | P2/c                                                          |
| a/Å                                         | 17.2708(7)                                                    |
| b/Å                                         | 4.7852(2)                                                     |
| c/Å                                         | 9.9268(4)                                                     |
| $\alpha$ /°                                 | 90                                                            |
| $\beta$ /°                                  | 95.928(4)                                                     |
| $\gamma$ /°                                 | 90                                                            |
| Volume/Å <sup>3</sup>                       | 816.01(6)                                                     |
| Z                                           | 2                                                             |
| $\rho_{\text{calc}}/\text{cm}^3$            | 1.263                                                         |
| $\mu/\text{mm}^{-1}$                        | 0.656                                                         |
| F(000)                                      | 332.0                                                         |
| Crystal size/mm <sup>3</sup>                | 0.14 × 0.12 × 0.08                                            |
| Radiation                                   | Cu K $\alpha$ ( $\lambda$ = 1.54184)                          |
| 2 $\theta$ range for data collection/°      | 5.144 to 146.856                                              |
| Index ranges                                | -19 ≤ h ≤ 21, -3 ≤ k ≤ 5, -11 ≤ l ≤ 12                        |
| Reflections collected                       | 2646                                                          |
| Independent reflections                     | 1597 [R <sub>int</sub> = 0.0194, R <sub>sigma</sub> = 0.0273] |
| Data/restraints/parameters                  | 1597/0/107                                                    |
| Goodness-of-fit on F <sup>2</sup>           | 1.041                                                         |
| Final R indexes [ $I \geq 2\sigma(I)$ ]     | R <sub>1</sub> = 0.0422, wR <sub>2</sub> = 0.1168             |
| Final R indexes [all data]                  | R <sub>1</sub> = 0.0494, wR <sub>2</sub> = 0.1251             |
| Largest diff. peak/hole / e Å <sup>-3</sup> | 0.23/-0.18                                                    |



Data intensity of compound **5b** was collected using a Bruker 'Bruker APEX-II CCD' diffractometer at 170.00 (10) K. Data collection and reduction were done by using Olex2 and the structure was solved with the ShelXS structure solution program using direct methods and refined by full-matrix least-squares on  $F^2$  with anisotropic displacement parameters for non-H atoms using SHELX-97. Hydrogen atoms were added at their geometrically ideal positions and refined isotropically. (CCDC 2242165).

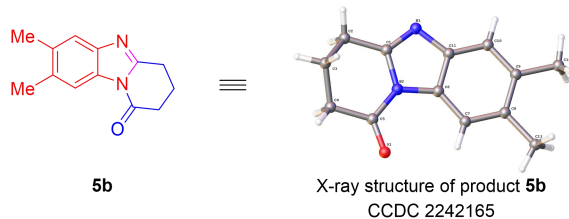

|                                                |                                                                  |
|------------------------------------------------|------------------------------------------------------------------|
| Empirical formula                              | $C_{13}H_{14}N_2O$                                               |
| Formula weight                                 | 214.26                                                           |
| Temperature/K                                  | 170.00 (10)                                                      |
| Crystal system                                 | monoclinic                                                       |
| Space group                                    | $P2_1/c$                                                         |
| a/Å                                            | 6.33660(10)                                                      |
| b/Å                                            | 15.1353(2)                                                       |
| c/Å                                            | 11.4895(2)                                                       |
| $\alpha/^\circ$                                | 90                                                               |
| $\beta/^\circ$                                 | 98.0090(10)                                                      |
| $\gamma/^\circ$                                | 90                                                               |
| Volume/Å <sup>3</sup>                          | 1091.17(3)                                                       |
| Z                                              | 4                                                                |
| $\rho_{\text{calc}}/\text{cm}^3$               | 1.304                                                            |
| $\mu/\text{mm}^{-1}$                           | 0.670                                                            |
| F(000)                                         | 456.0                                                            |
| Crystal size/mm <sup>3</sup>                   | 0.13 × 0.17 × 0.18                                               |
| Radiation                                      | Cu K $\alpha$ ( $\lambda = 1.54184$ )                            |
| 2 $\theta$ range for data collection/ $^\circ$ | 9.162 to 154.924                                                 |
| Index ranges                                   | -13 ≤ h ≤ 13, -16 ≤ k ≤ 14, -18 ≤ l ≤ 17                         |
| Reflections collected                          | 5140                                                             |
| Independent reflections                        | 2095 [ $R_{\text{int}} = 0.0136$ , $R_{\text{sigma}} = 0.0167$ ] |
| Data/restraints/parameters                     | 2095/0/148                                                       |
| Goodness-of-fit on $F^2$                       | 1.090                                                            |
| Final R indexes [ $I \geq 2\sigma(I)$ ]        | $R_1 = 0.0418$ , $wR_2 = 0.1209$                                 |
| Final R indexes [all data]                     | $R_1 = 0.0438$ , $wR_2 = 0.1224$                                 |
| Largest diff. peak/hole / e Å <sup>-3</sup>    | 0.40/-0.17                                                       |

Data intensity of compound **5g** was collected using a Bruker 'Bruker APEX-II CCD' diffractometer at 297.24 (10) K. Data collection and reduction were done by using Olex2 and the structure was solved with the ShelXS structure solution program using direct methods and refined by full-matrix least-squares on  $F^2$  with anisotropic displacement parameters for non-H atoms using SHELX-97. Hydrogen atoms were added at their geometrically ideal positions and refined isotropically. (CCDC 2289773).

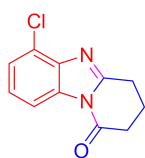

**5g**

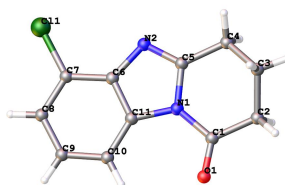

X-ray structure of product **5g**  
CCDC 2289773

|                                               |                                                               |
|-----------------------------------------------|---------------------------------------------------------------|
| Empirical formula                             | $C_{11}H_9ClN_2O$                                             |
| Formula weight                                | 220.65                                                        |
| Temperature/K                                 | 297.24 (10)                                                   |
| Crystal system                                | monoclinic                                                    |
| Space group                                   | $I2/a$                                                        |
| $a/\text{\AA}$                                | 10.8166(3)                                                    |
| $b/\text{\AA}$                                | 13.6079(4)                                                    |
| $c/\text{\AA}$                                | 14.4431(6)                                                    |
| $\alpha/^\circ$                               | 90                                                            |
| $\beta/^\circ$                                | 108.571(4)                                                    |
| $\gamma/^\circ$                               | 90                                                            |
| Volume/ $\text{\AA}^3$                        | 2015.20(13)                                                   |
| Z                                             | 8                                                             |
| $\rho_{\text{calc}}/\text{g cm}^{-3}$         | 1.455                                                         |
| $\mu/\text{mm}^{-1}$                          | 3.130                                                         |
| F(000)                                        | 912.0                                                         |
| Crystal size/ $\text{mm}^3$                   | 912.0                                                         |
| Radiation                                     | Cu $K\alpha$ ( $\lambda = 1.54184$ )                          |
| $2\theta$ range for data collection/ $^\circ$ | 9.162 to 154.924                                              |
| Index ranges                                  | $-13 \leq h \leq 13, -16 \leq k \leq 14, -18 \leq l \leq 17$  |
| Reflections collected                         | 6739                                                          |
| Independent reflections                       | 2009 [ $R_{\text{int}} = 0.0725, R_{\text{sigma}} = 0.0638$ ] |
| Data/restraints/parameters                    | 2009/0/137                                                    |
| Goodness-of-fit on $F^2$                      | 1.285                                                         |
| Final R indexes [ $ I  \geq 2\sigma(I)$ ]     | $R_1 = 0.0817, wR_2 = 0.3097$                                 |
| Final R indexes [all data]                    | $R_1 = 0.1094, wR_2 = 0.3239$                                 |
| Largest diff. peak/hole / $e \text{\AA}^{-3}$ | 0.45/-0.30                                                    |

Data intensity of compound **7a** was collected using a Bruker 'Bruker APEX-II CCD' diffractometer at 169.99 (10) K. Data collection and reduction were done by using Olex2 and the structure was solved with the ShelXS structure solution program using direct methods and refined by full-matrix least-squares on  $F^2$  with anisotropic displacement parameters for non-H atoms using SHELX-97. Hydrogen atoms were added at their geometrically ideal positions and refined isotropically (CCDC 2242071).

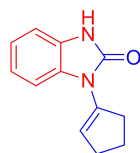

**7a**

≡

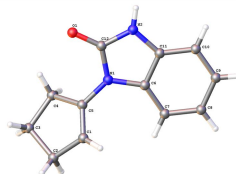

X-ray structure of product **7a**  
CCDC 2242071

|                                             |                                                               |
|---------------------------------------------|---------------------------------------------------------------|
| Empirical formula                           | C <sub>12</sub> H <sub>12</sub> N <sub>2</sub> O              |
| Formula weight                              | 200.24                                                        |
| Temperature/K                               | 169.99(10)                                                    |
| Crystal system                              | triclinic                                                     |
| Space group                                 | P-1                                                           |
| a/Å                                         | 4.2516(9)                                                     |
| b/Å                                         | 8.8641(13)                                                    |
| c/Å                                         | 13.329(3)                                                     |
| α/°                                         | 83.536(16)                                                    |
| β/°                                         | 81.034(19)                                                    |
| γ/°                                         | 87.099(15)                                                    |
| Volume/Å <sup>3</sup>                       | 492.76(18)                                                    |
| Z                                           | 2                                                             |
| ρ <sub>calc</sub> /cm <sup>3</sup>          | 1.350                                                         |
| μ/mm <sup>-1</sup>                          | 0.705                                                         |
| F(000)                                      | 212.0                                                         |
| Crystal size/mm <sup>3</sup>                | 0.14 × 0.13 × 0.11                                            |
| Radiation                                   | Cu Kα (λ = 1.54184)                                           |
| 2θ range for data collection/°              | 6.752 to 151.916                                              |
| Index ranges                                | -3 ≤ h ≤ 5, -8 ≤ k ≤ 10, -16 ≤ l ≤ 16                         |
| Reflections collected                       | 2840                                                          |
| Independent reflections                     | 1911 [R <sub>int</sub> = 0.0868, R <sub>sigma</sub> = 0.1103] |
| Data/restraints/parameters                  | 1911/0/137                                                    |
| Goodness-of-fit on F <sup>2</sup>           | 1.069                                                         |
| Final R indexes [I ≥ 2σ (I)]                | R <sub>1</sub> = 0.1267, wR <sub>2</sub> = 0.3372             |
| Final R indexes [all data]                  | R <sub>1</sub> = 0.1740, wR <sub>2</sub> = 0.3806             |
| Largest diff. peak/hole / e Å <sup>-3</sup> | 0.49/-0.48                                                    |

Data intensity of compound **7e** was collected using a Bruker 'Bruker APEX-II CCD' diffractometer at 169.99 (10) K. Data collection and reduction were done by using Olex2 and the structure was solved with the ShelXS structure solution program using direct methods and refined by full-matrix least-squares on  $F^2$  with anisotropic displacement parameters for non-H atoms using SHELX-97. Hydrogen atoms were added at their geometrically ideal positions and refined isotropically (CCDC 2289775).

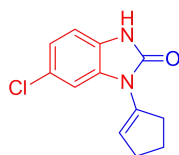

**7e**

≡

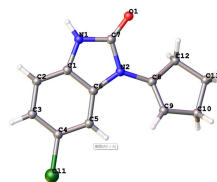

X-ray structure of product **7e**  
CCDC 2289775

|                                             |                                                               |
|---------------------------------------------|---------------------------------------------------------------|
| Empirical formula                           | C <sub>12</sub> H <sub>11</sub> ClN <sub>2</sub> O            |
| Formula weight                              | 234.68                                                        |
| Temperature/K                               | 169.99(10)                                                    |
| Crystal system                              | triclinic                                                     |
| Space group                                 | P-1                                                           |
| a/Å                                         | 6.9222(8)                                                     |
| b/Å                                         | 8.8334(11)                                                    |
| c/Å                                         | 8.9454(9)                                                     |
| $\alpha$ /°                                 | 98.054(9)                                                     |
| $\beta$ /°                                  | 98.509(9)                                                     |
| $\gamma$ /°                                 | 95.175(10)                                                    |
| Volume/Å <sup>3</sup>                       | 532.18(11)                                                    |
| Z                                           | 2                                                             |
| $\rho_{\text{calc}}/\text{cm}^3$            | 1.465                                                         |
| $\mu/\text{mm}^{-1}$                        | 0.336                                                         |
| F(000)                                      | 244.0                                                         |
| Crystal size/mm <sup>3</sup>                | 0.14 × 0.13 × 0.11                                            |
| Radiation                                   | Mo K $\alpha$ ( $\lambda$ = 0.71073)                          |
| 2 $\theta$ range for data collection/°      | 4.662 to 58.682                                               |
| Index ranges                                | -9 ≤ h ≤ 8, -8 ≤ k ≤ 12, -12 ≤ l ≤ 11                         |
| Reflections collected                       | 4032                                                          |
| Independent reflections                     | 2467 [R <sub>int</sub> = 0.0282, R <sub>sigma</sub> = 0.0623] |
| Data/restraints/parameters                  | 2467/0/145                                                    |
| Goodness-of-fit on F <sup>2</sup>           | 1.052                                                         |
| Final R indexes [ $ I  \geq 2\sigma(I)$ ]   | R <sub>1</sub> = 0.0571, wR <sub>2</sub> = 0.1212             |
| Final R indexes [all data]                  | R <sub>1</sub> = 0.0872, wR <sub>2</sub> = 0.1420             |
| Largest diff. peak/hole / e Å <sup>-3</sup> | 0.33/-0.27                                                    |

8. Copies of  $^1\text{H}$  NMR and  $^{13}\text{C}$  NMR Spectra of Compounds 3-18.

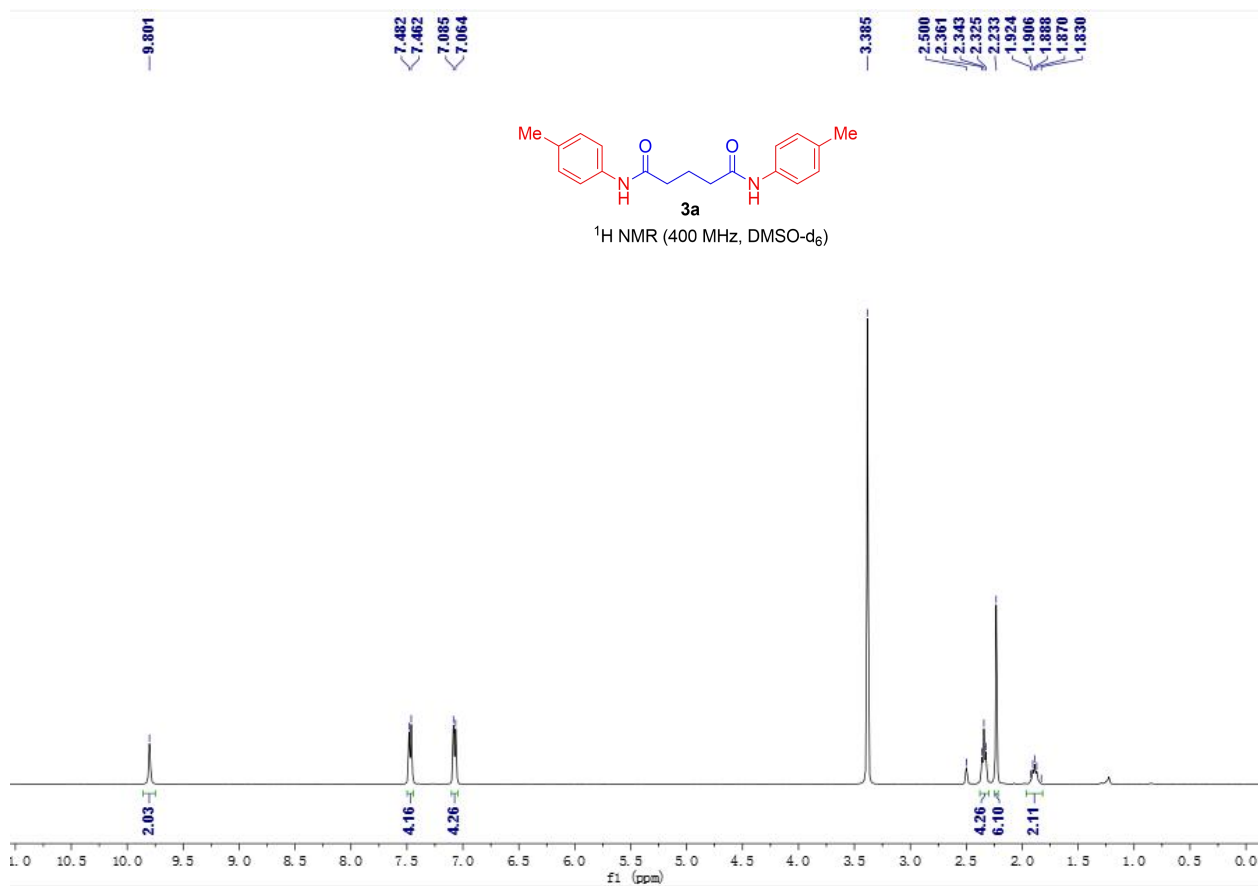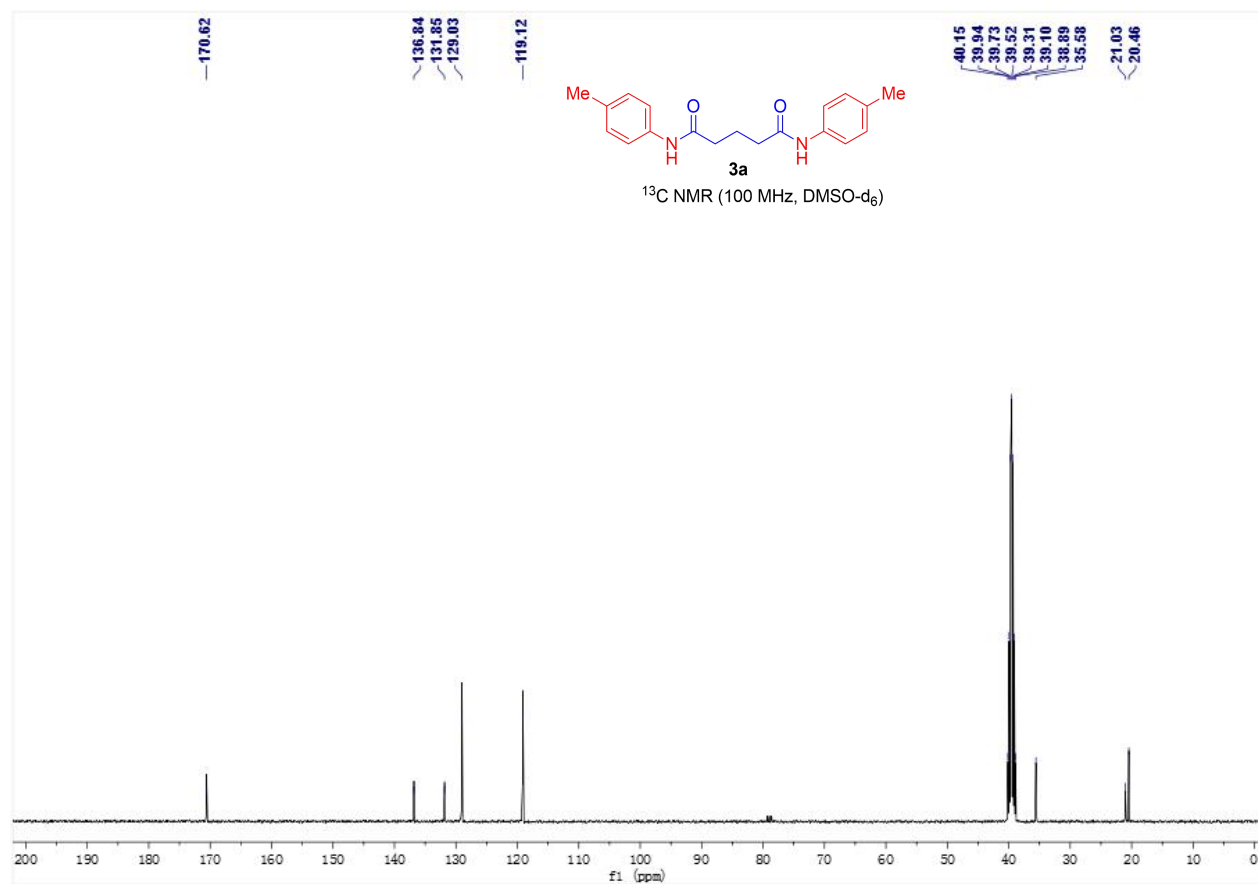

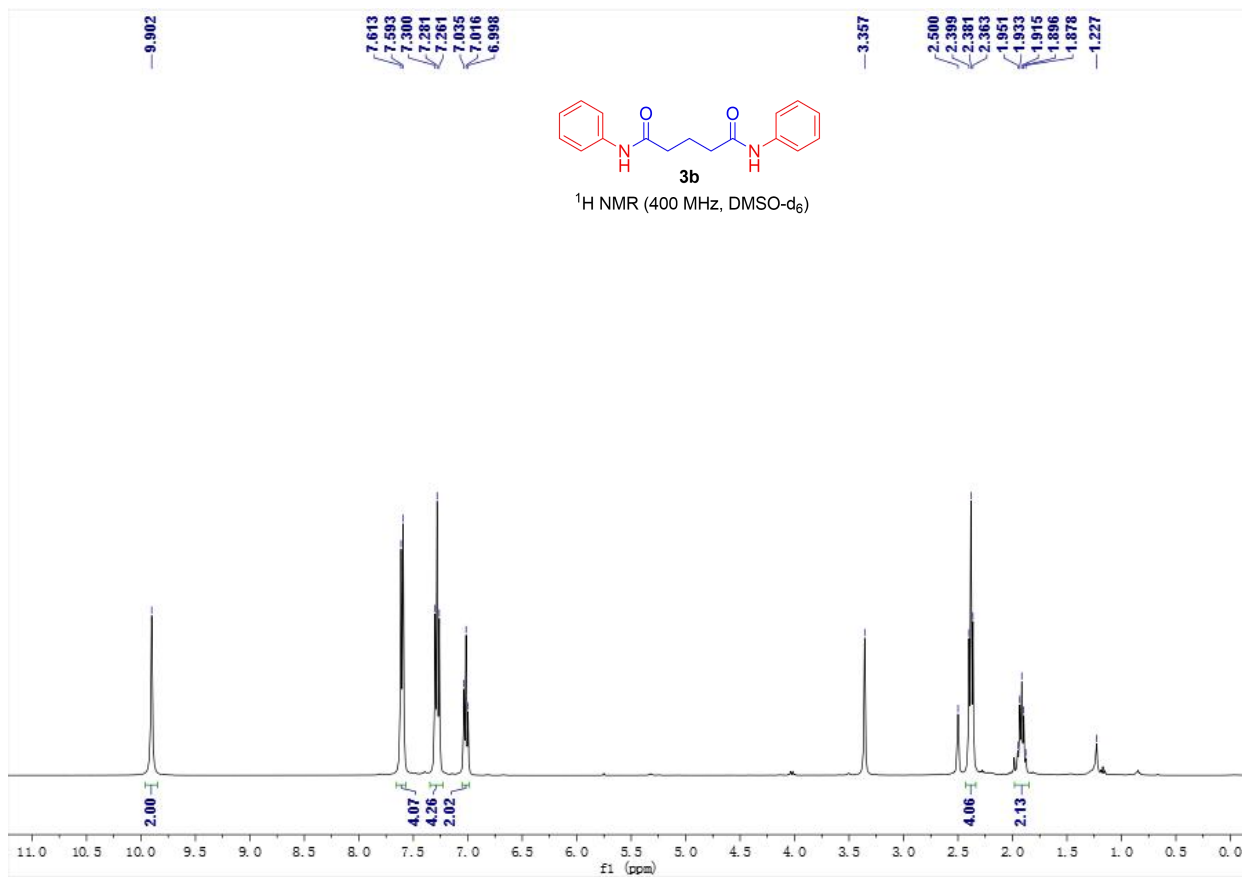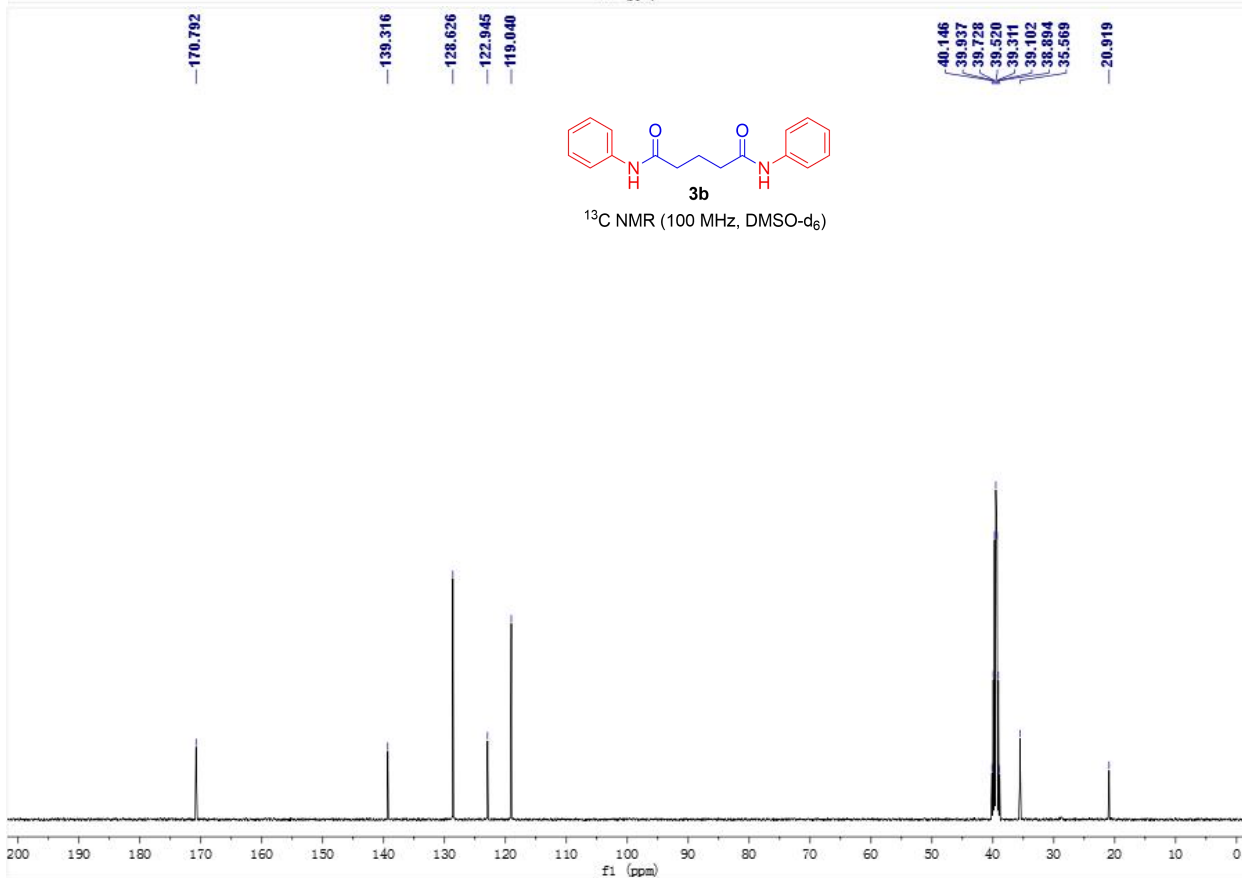

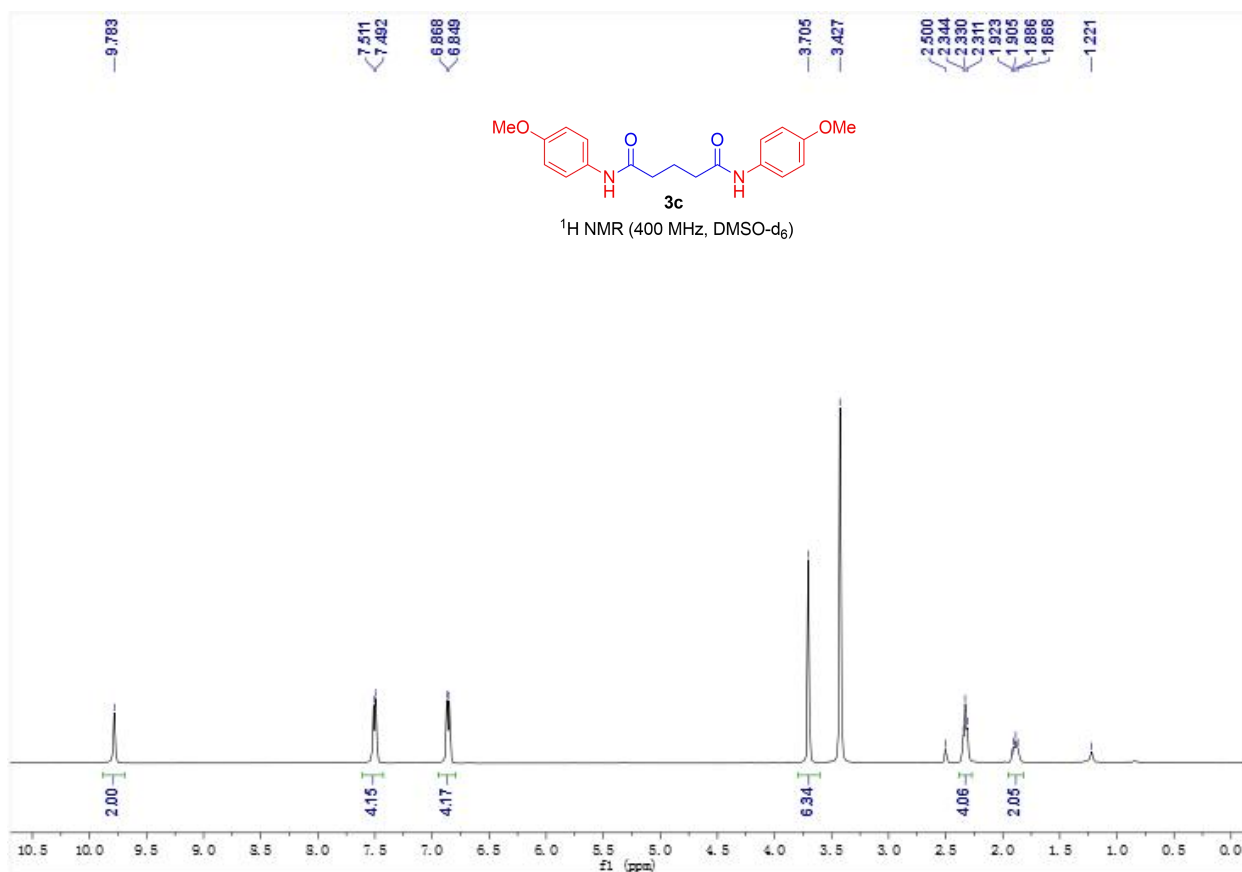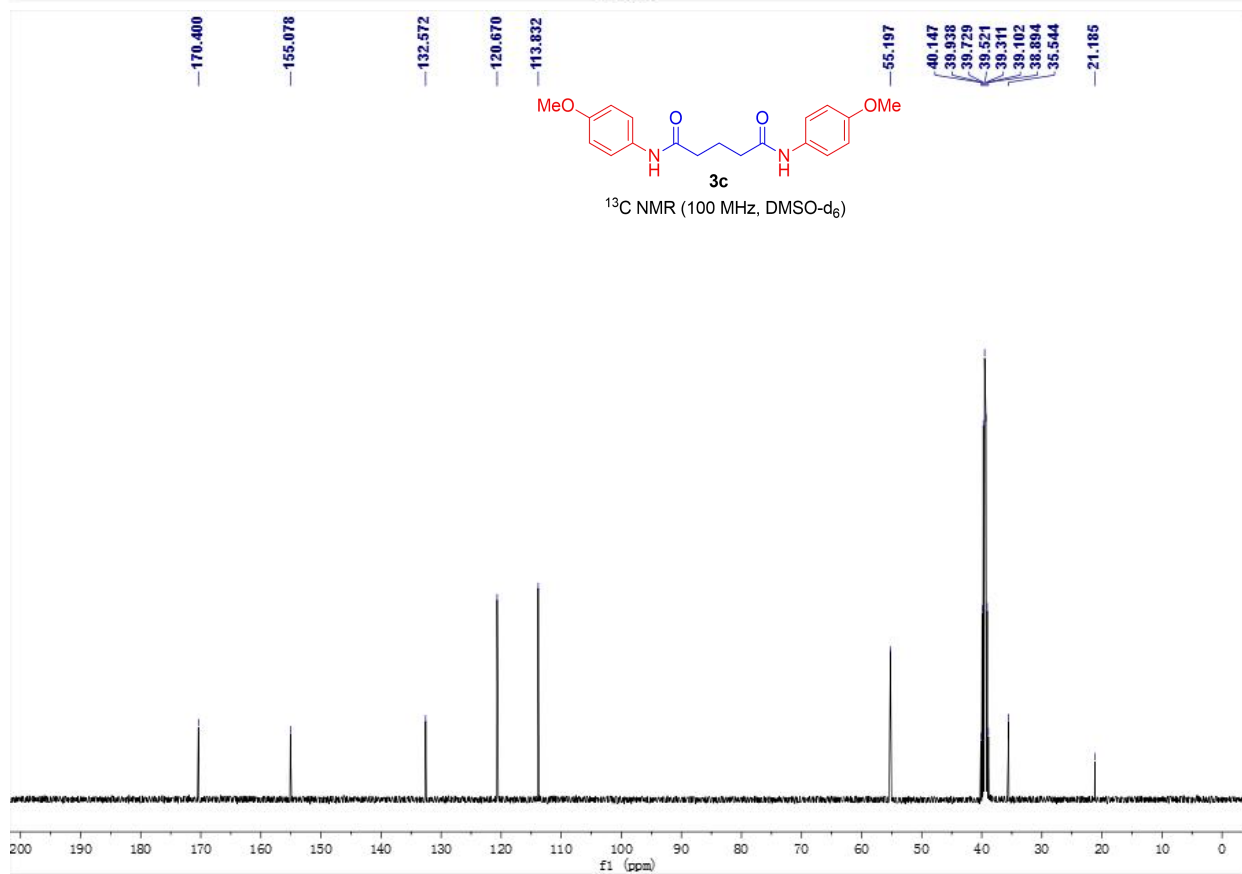

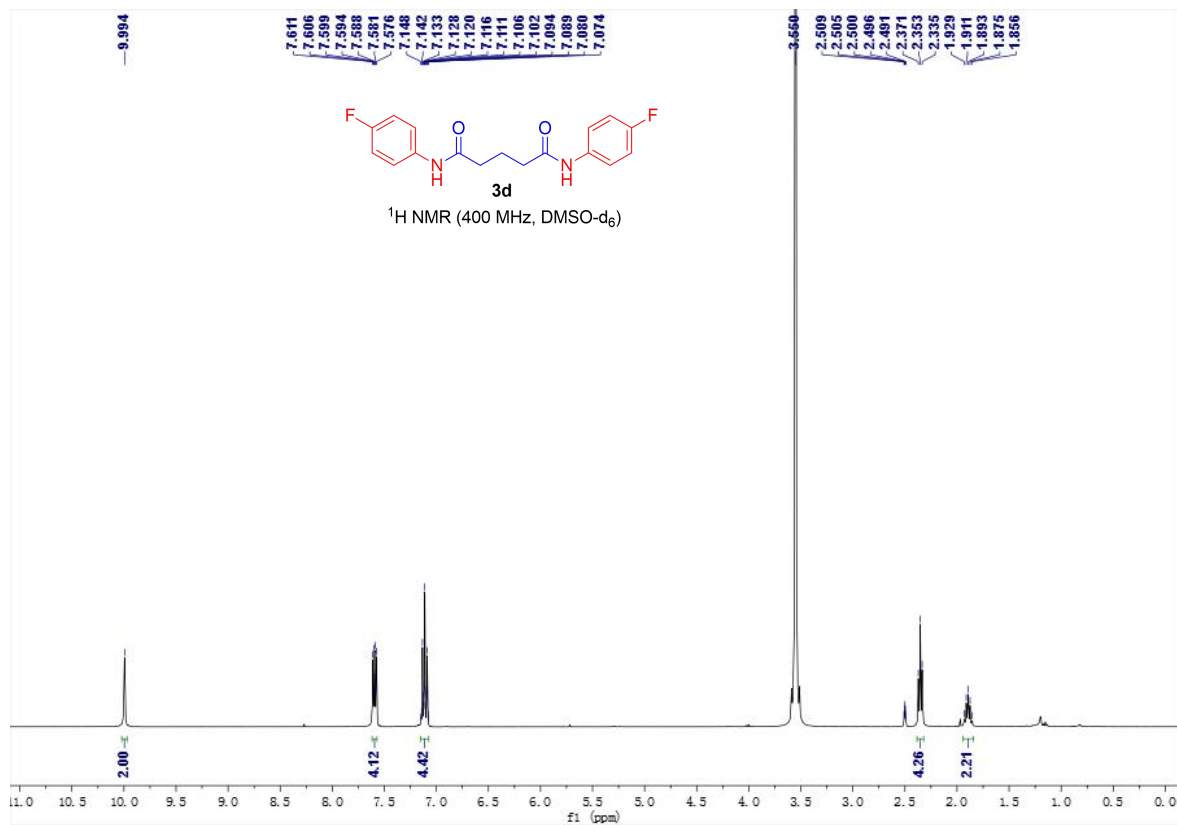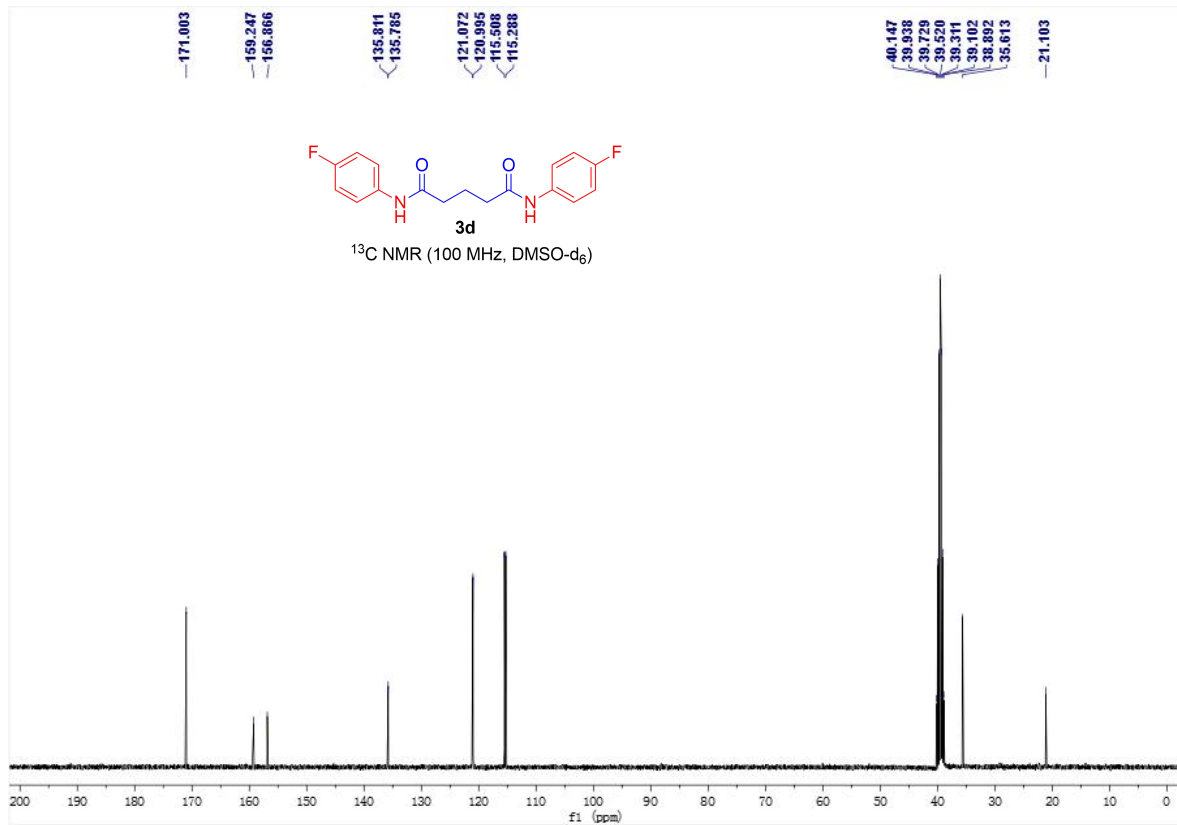



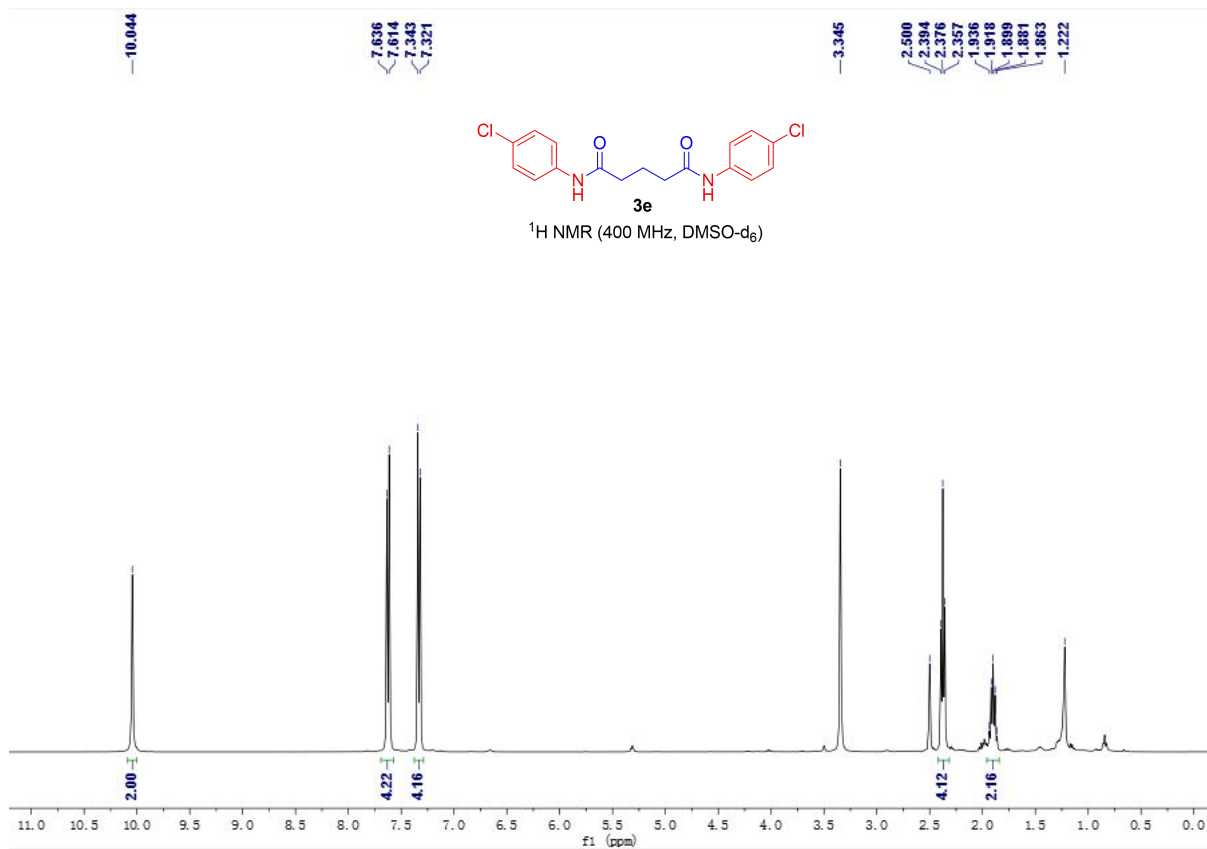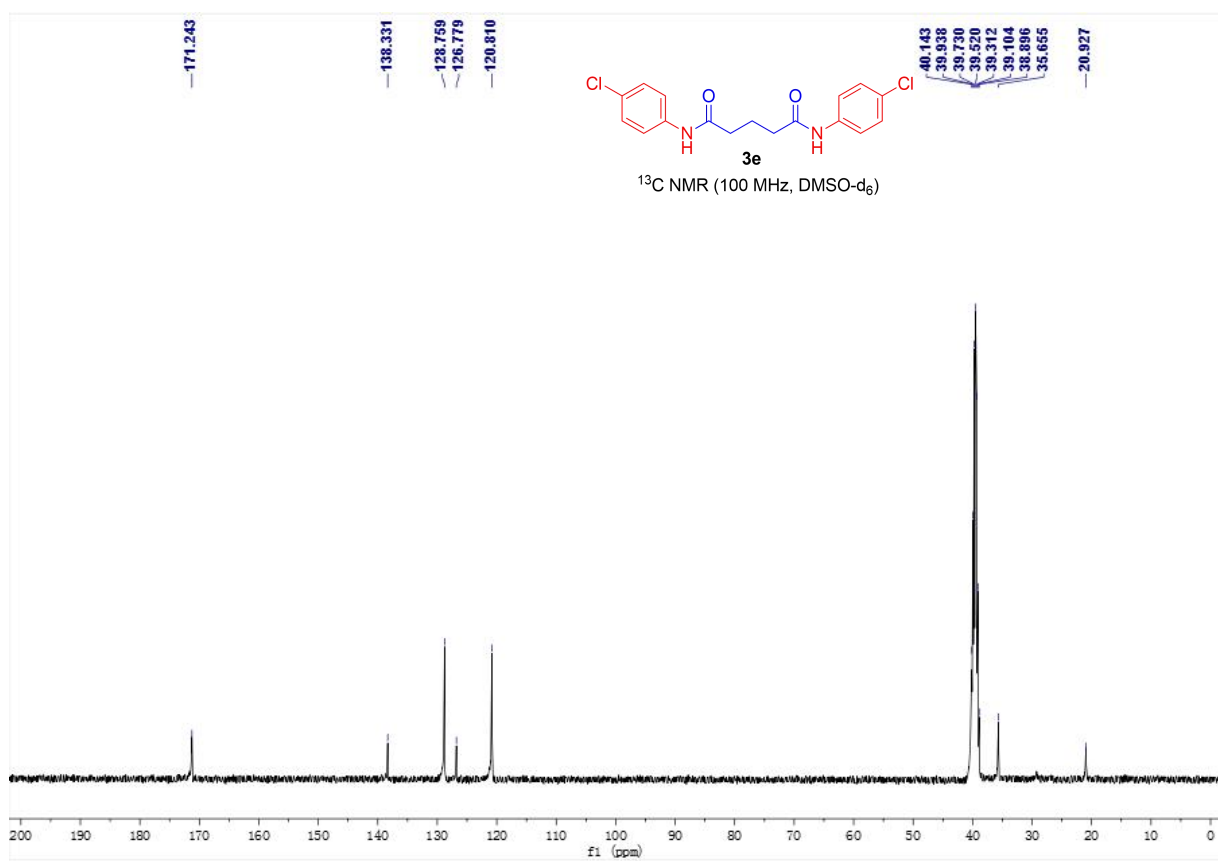

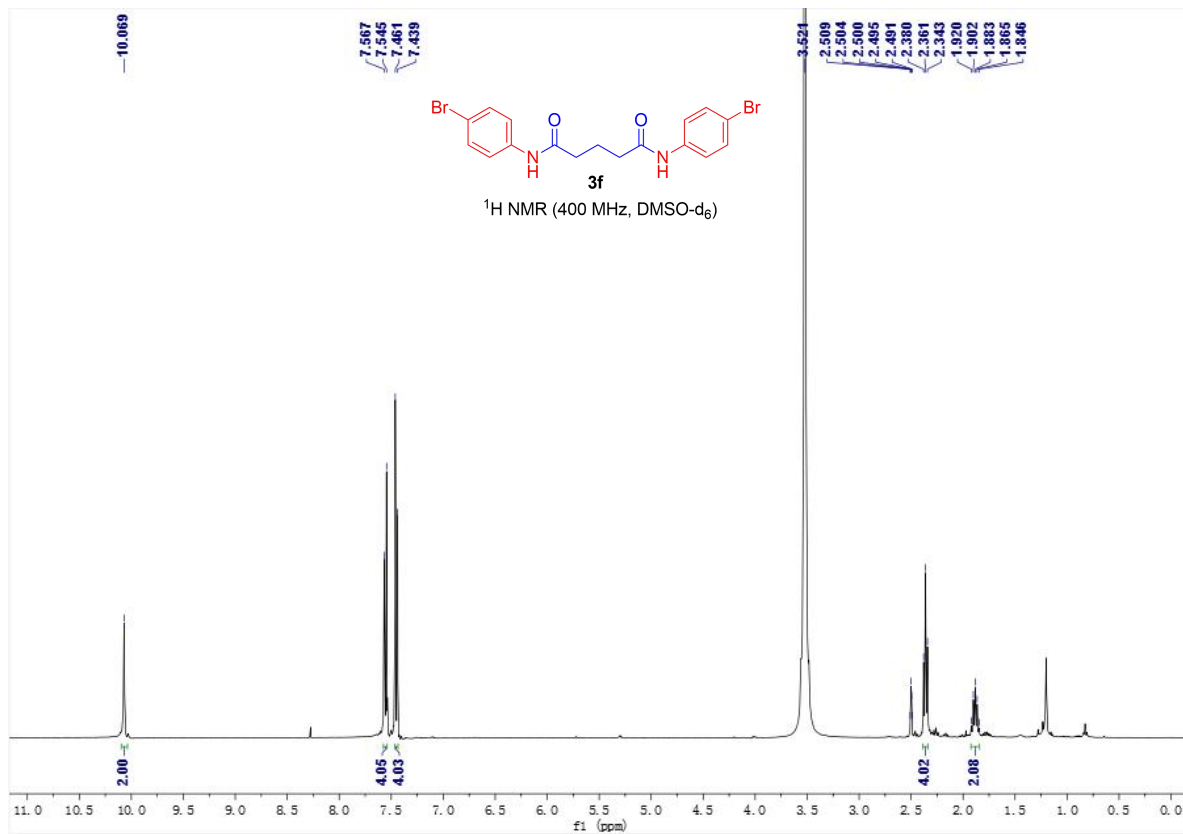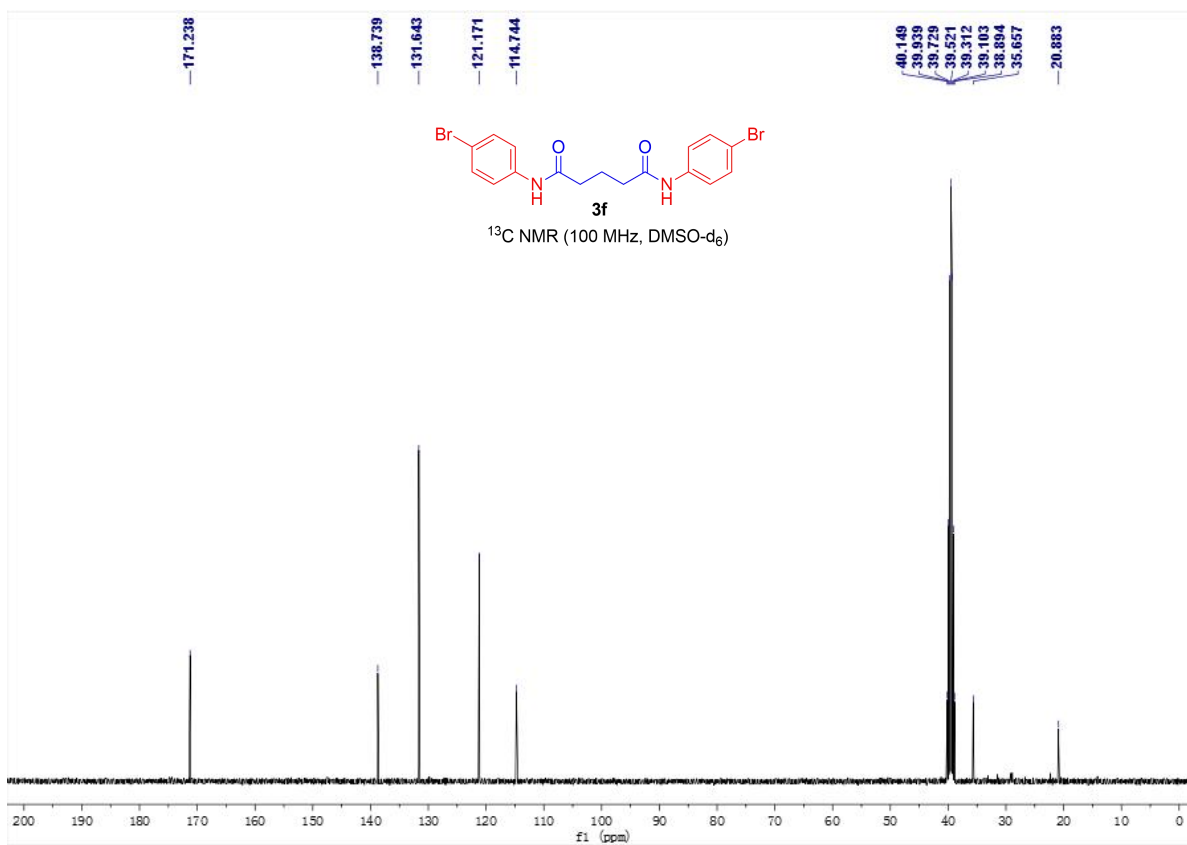

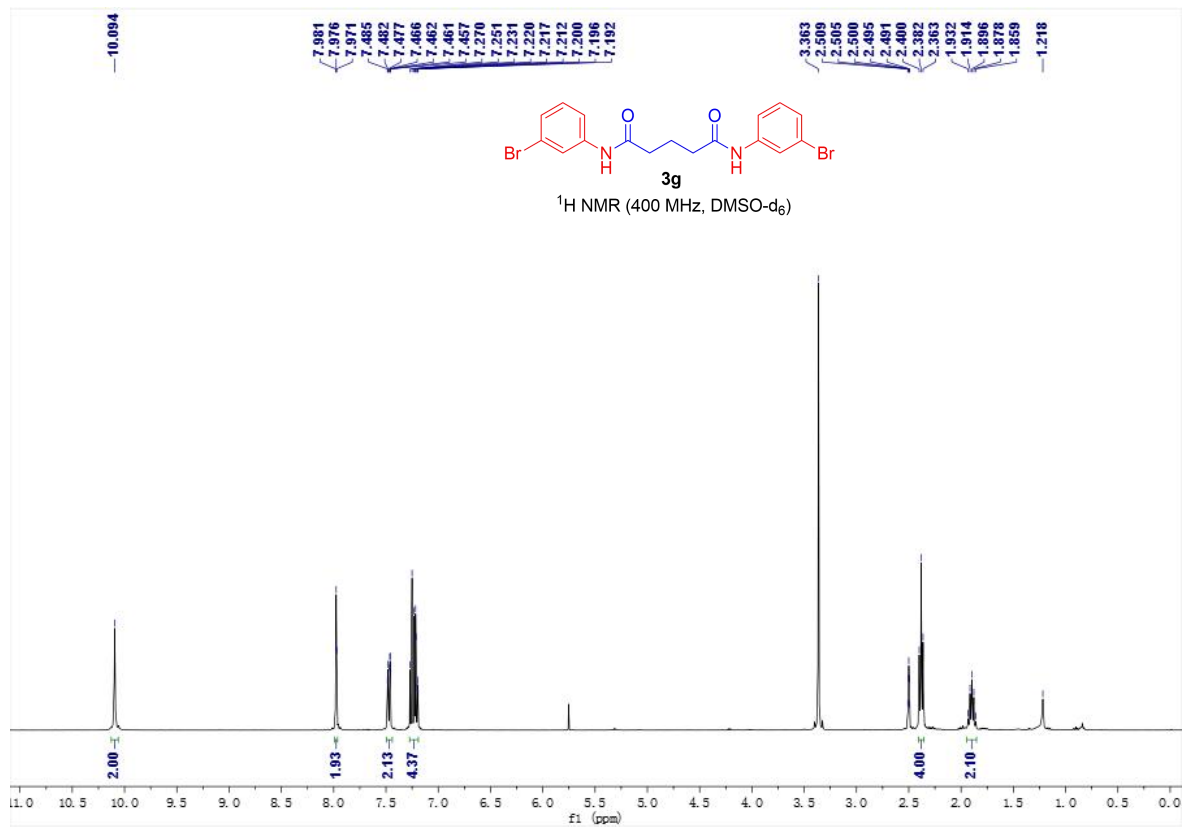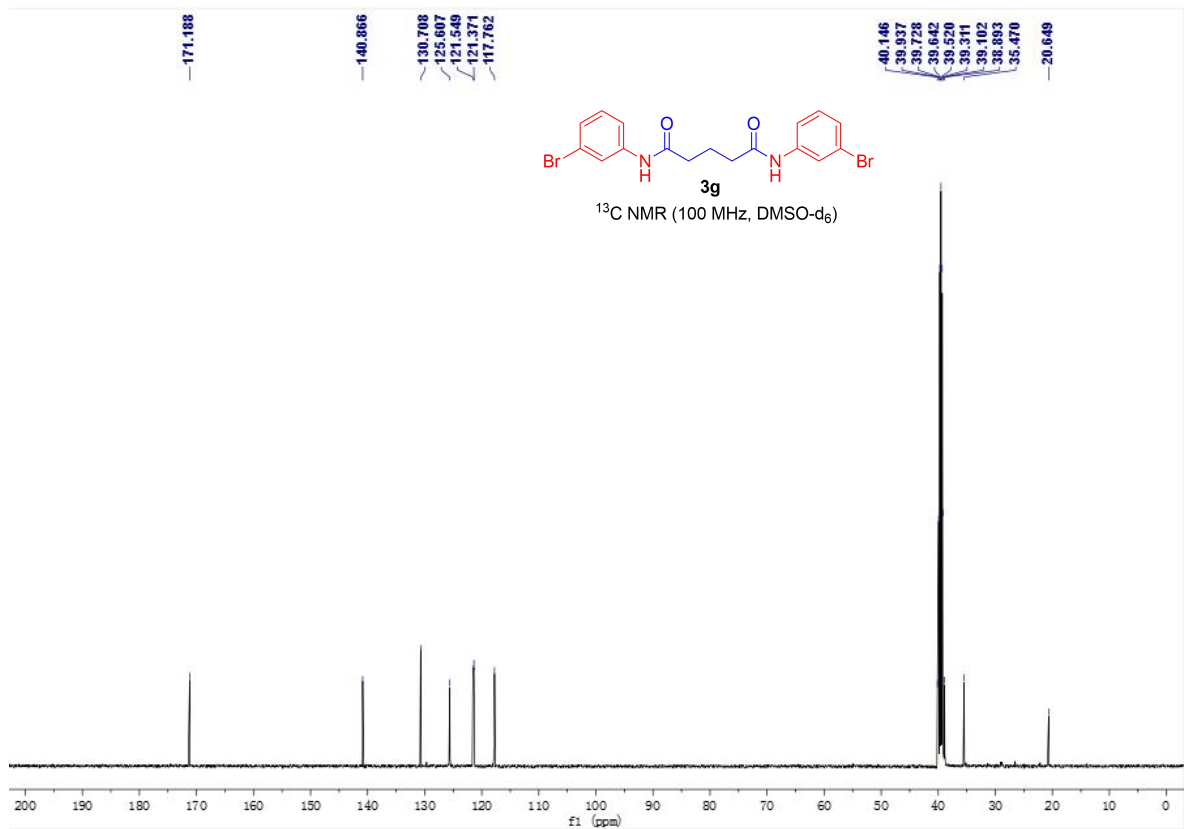

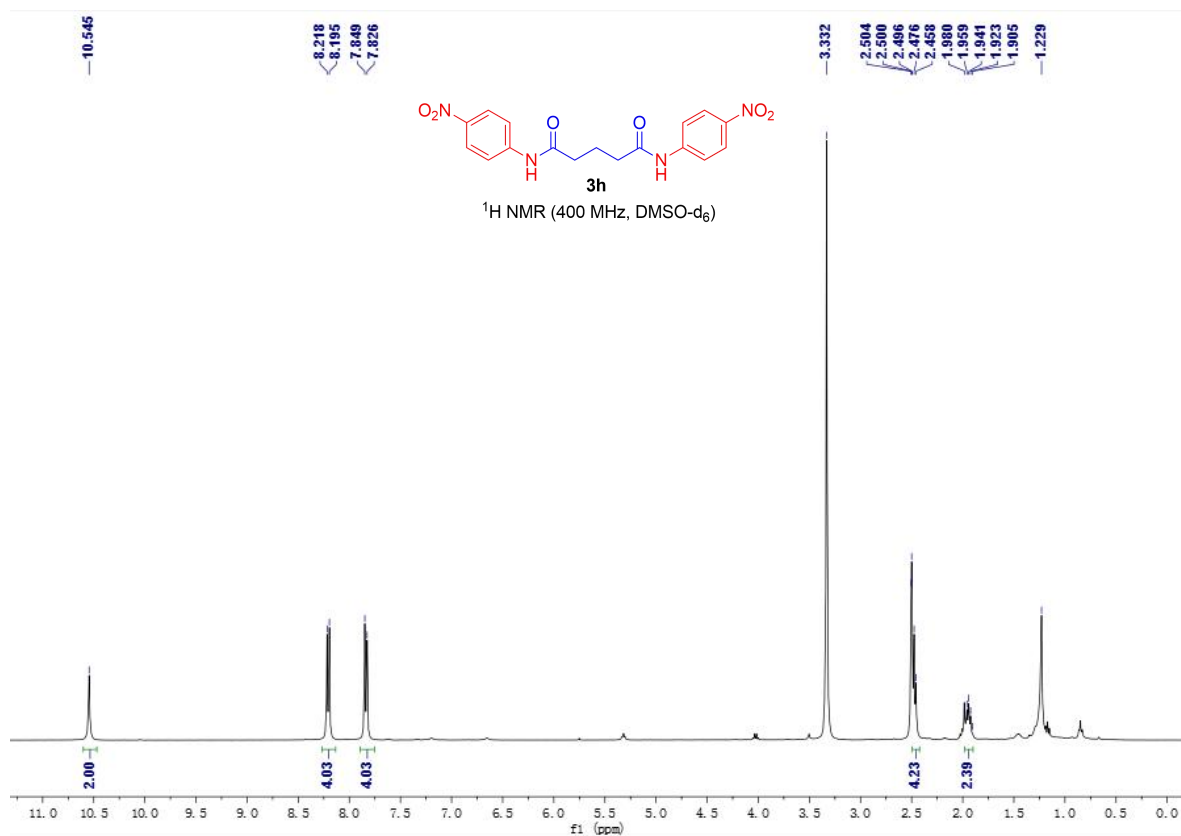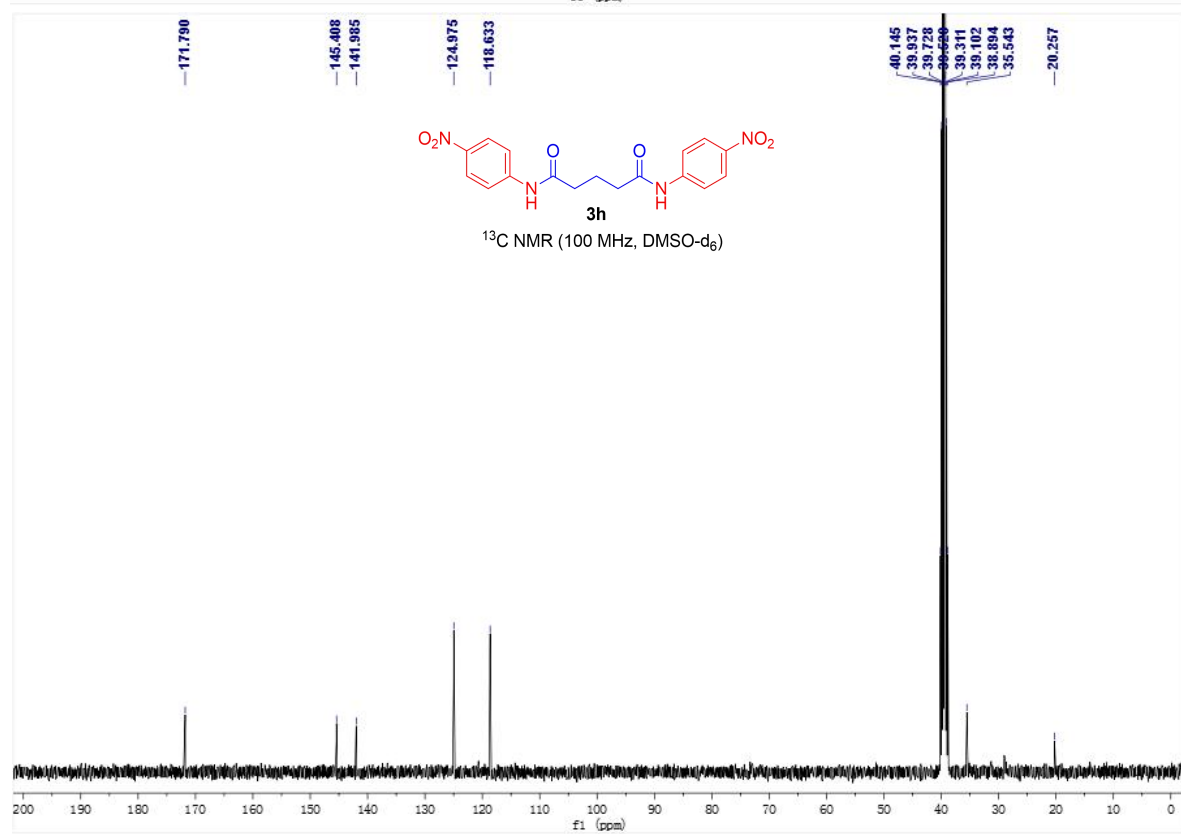

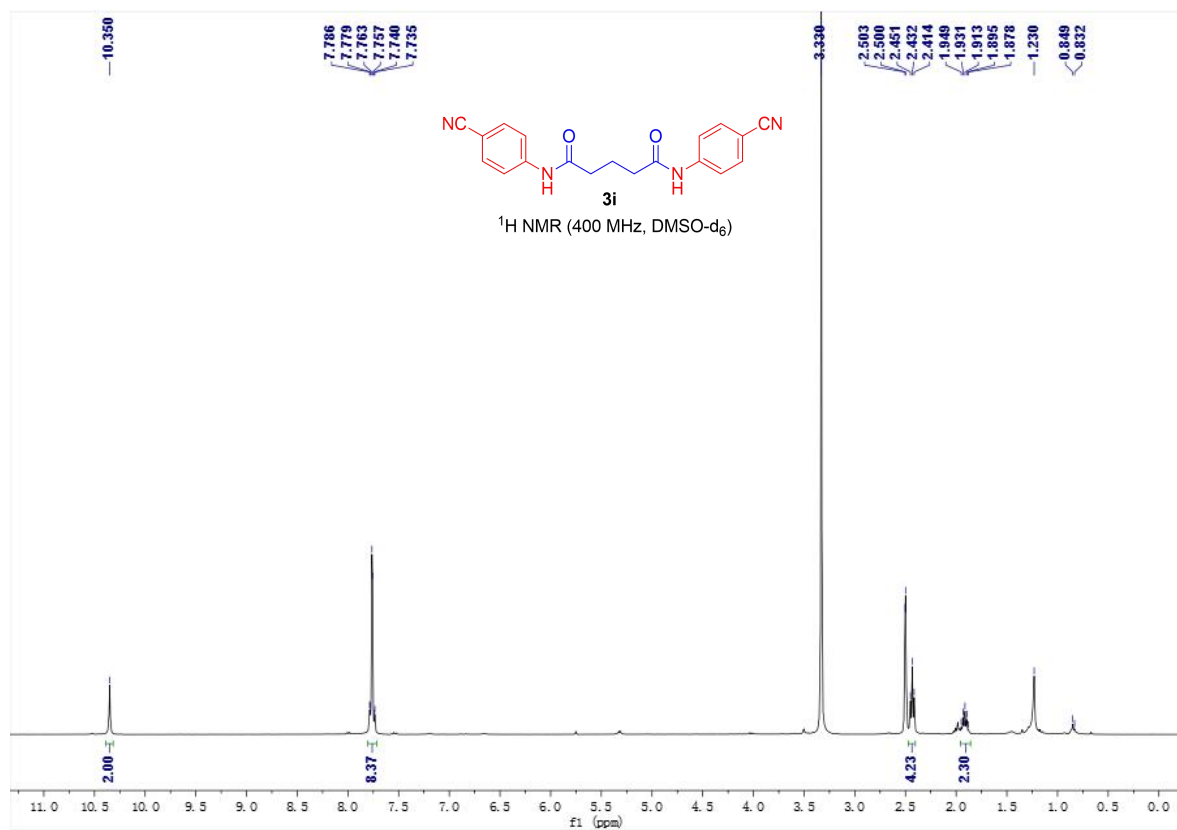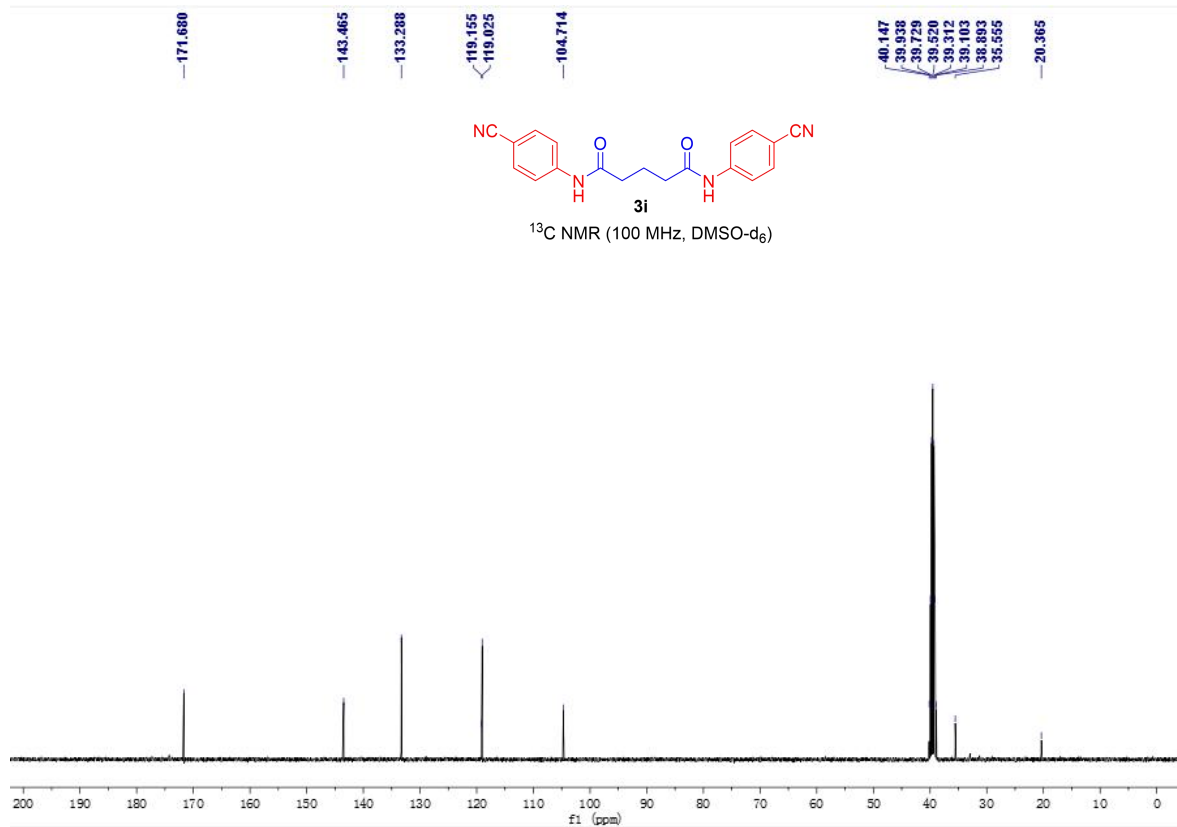

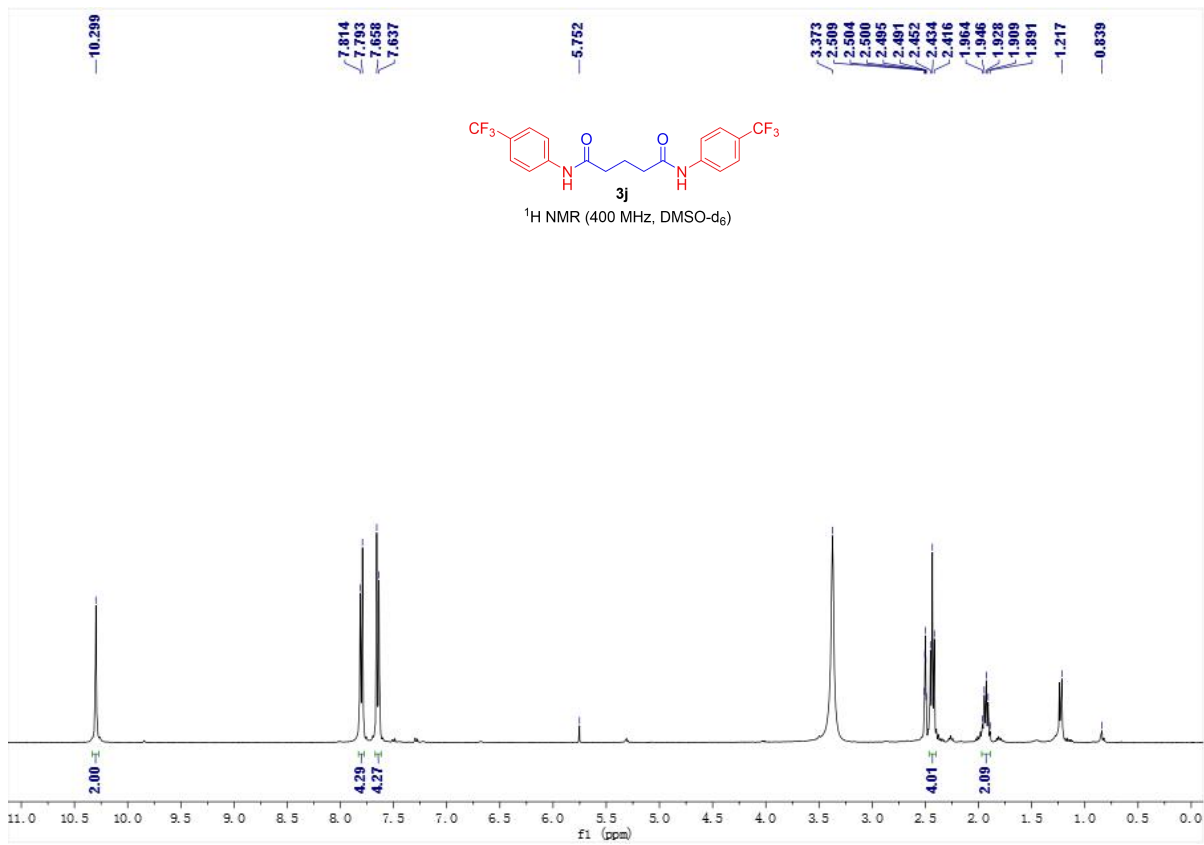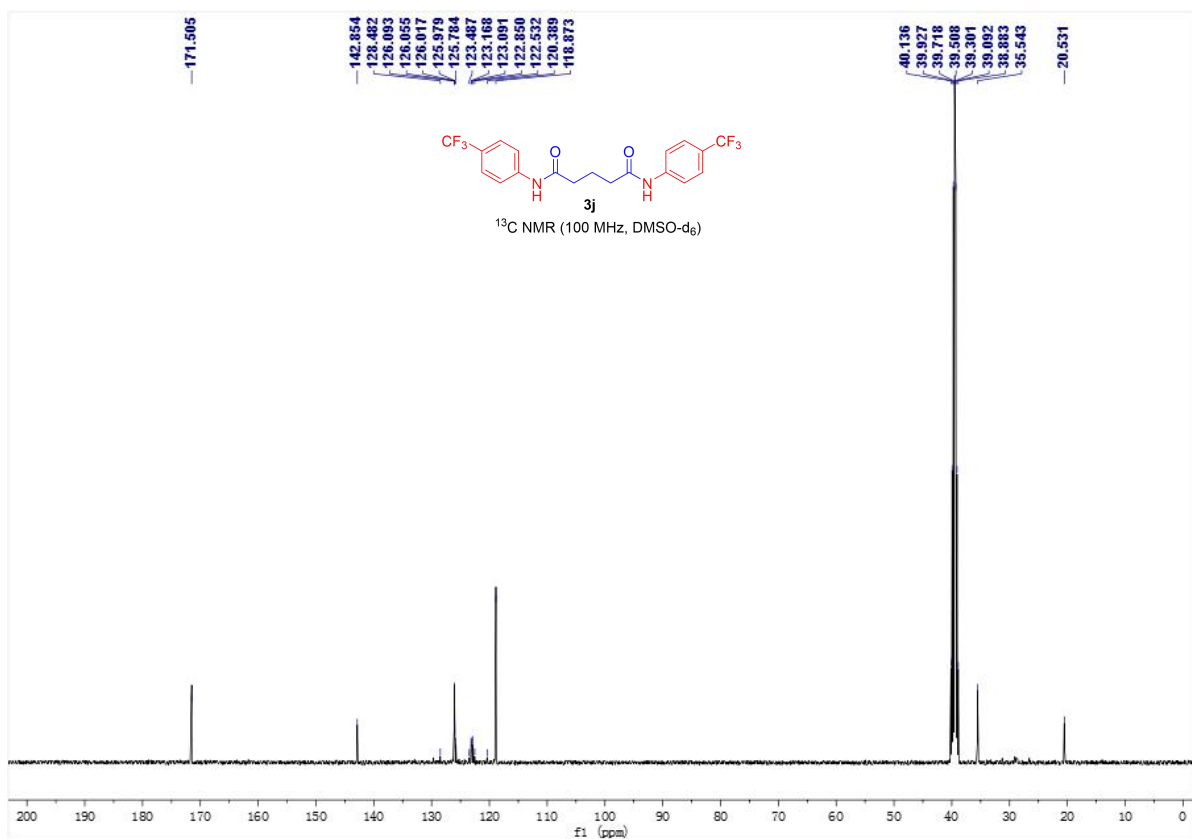

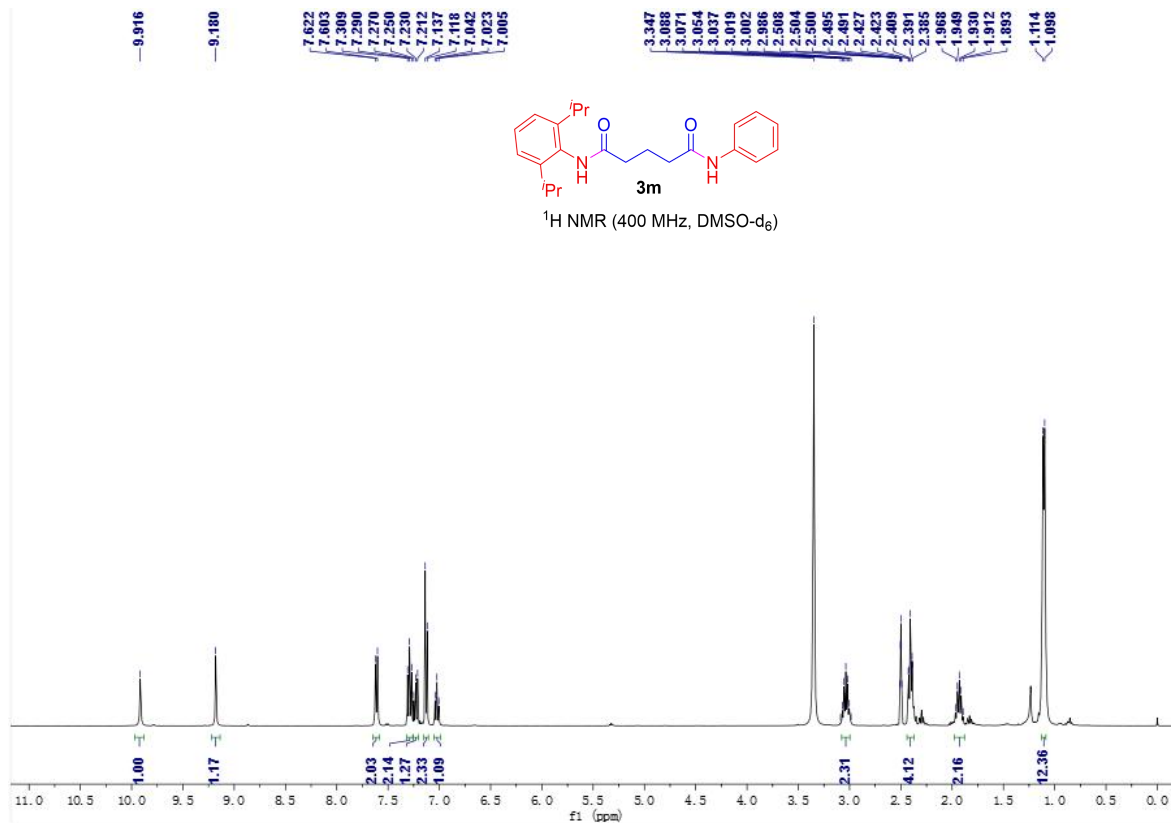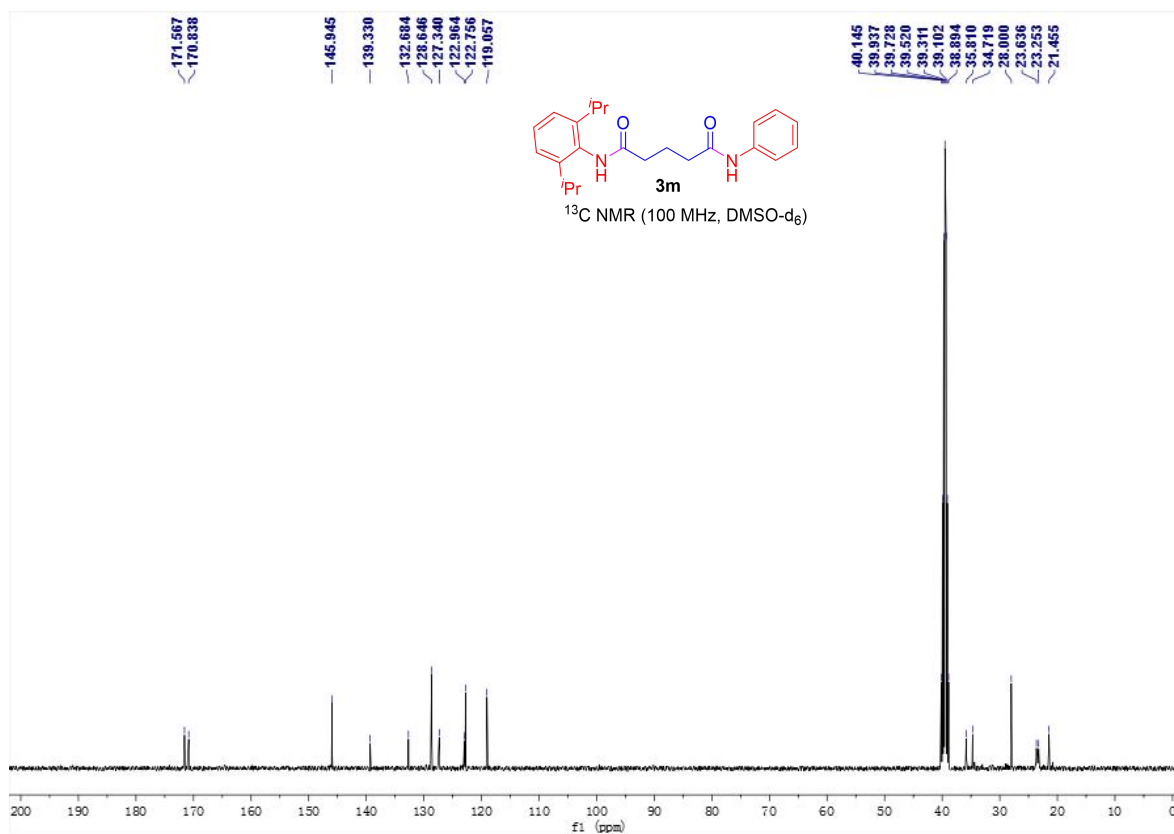

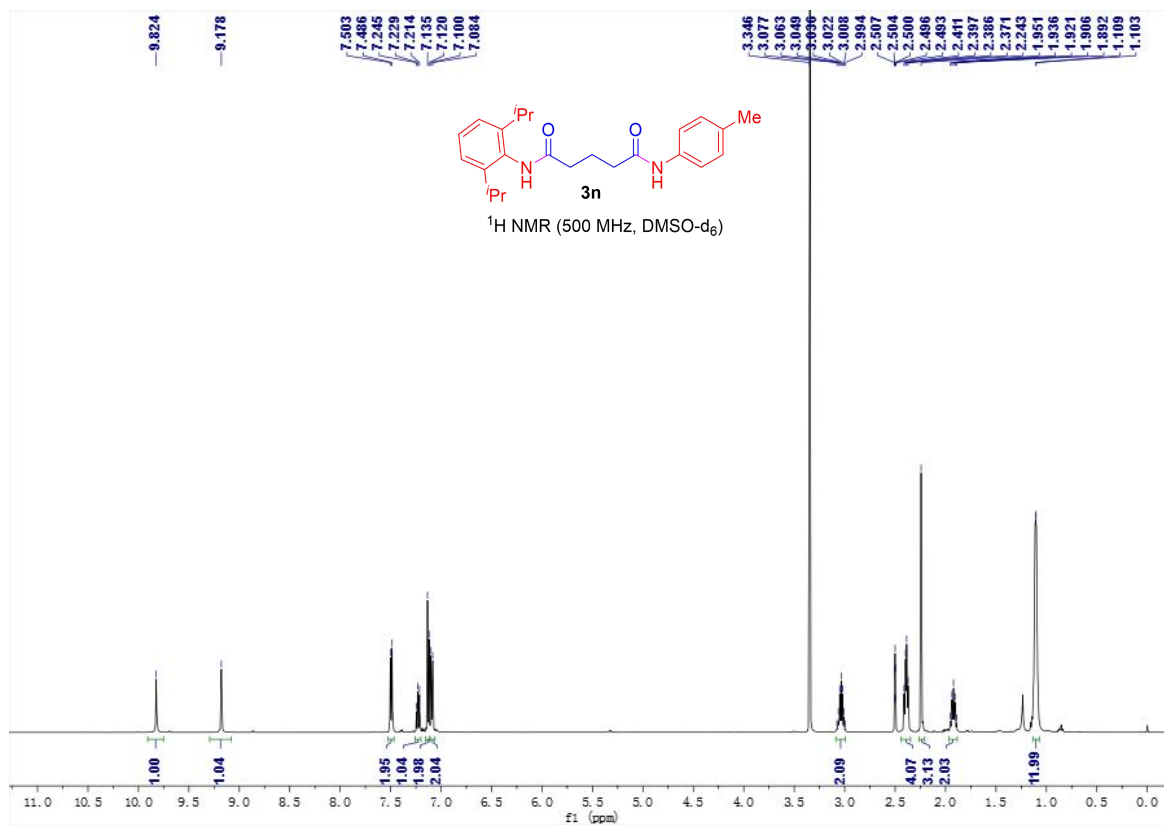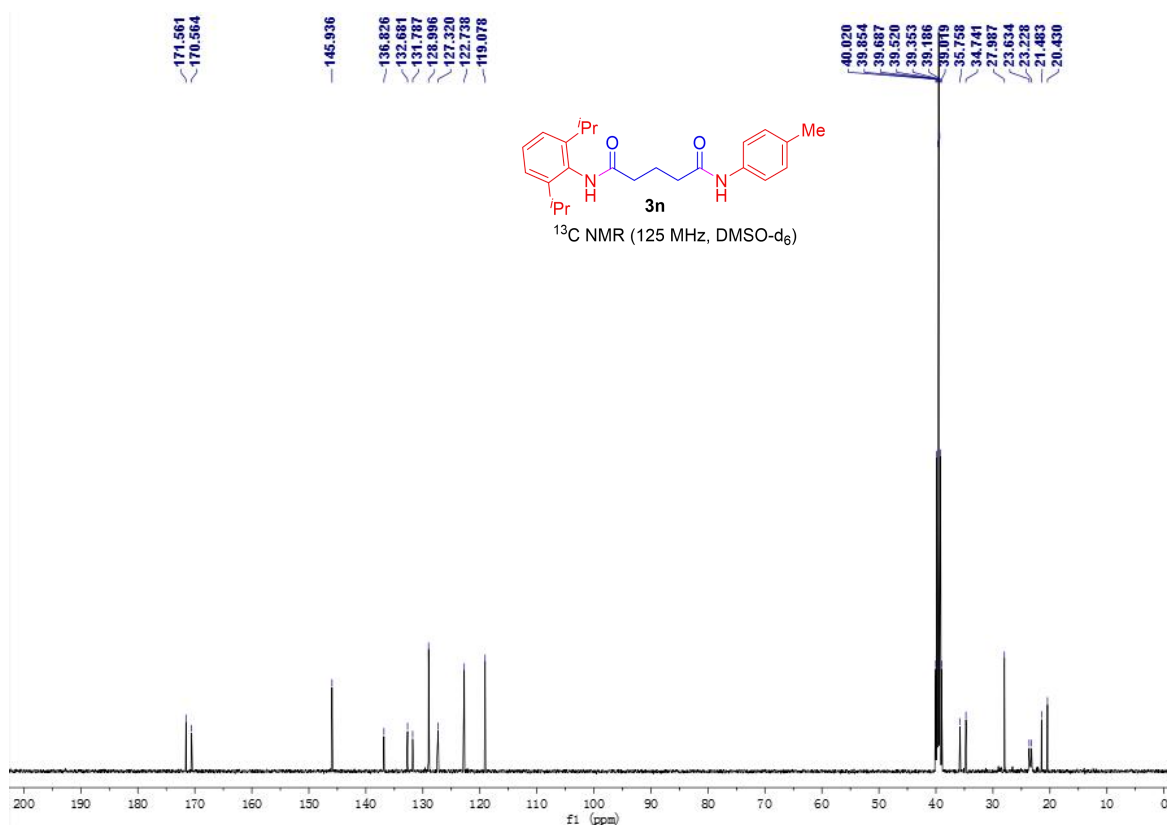



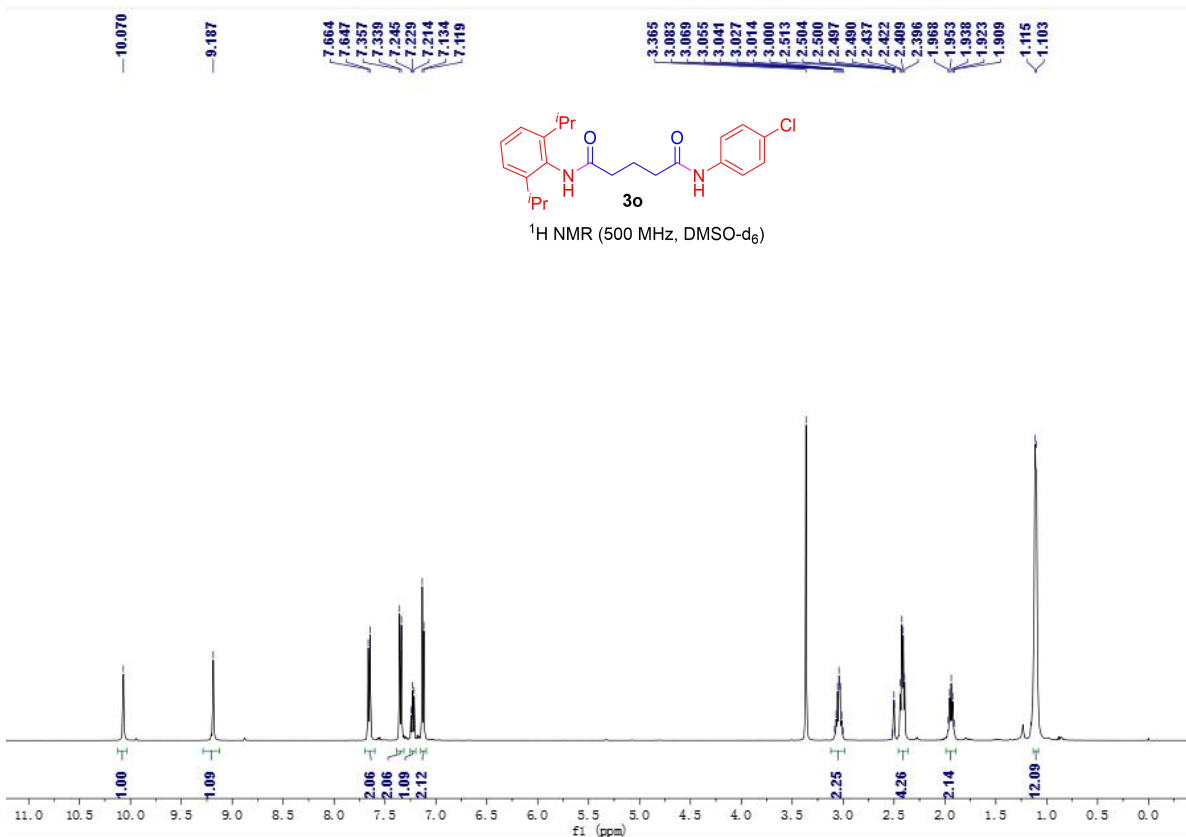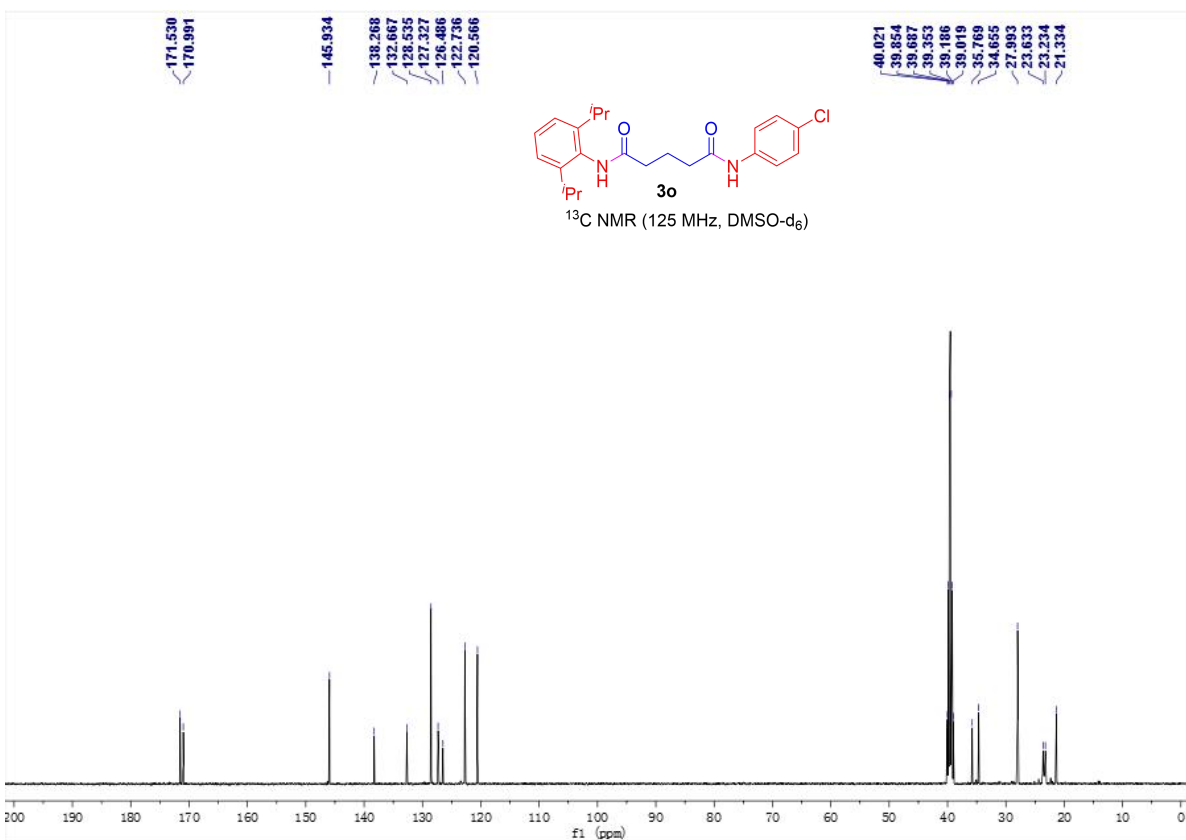

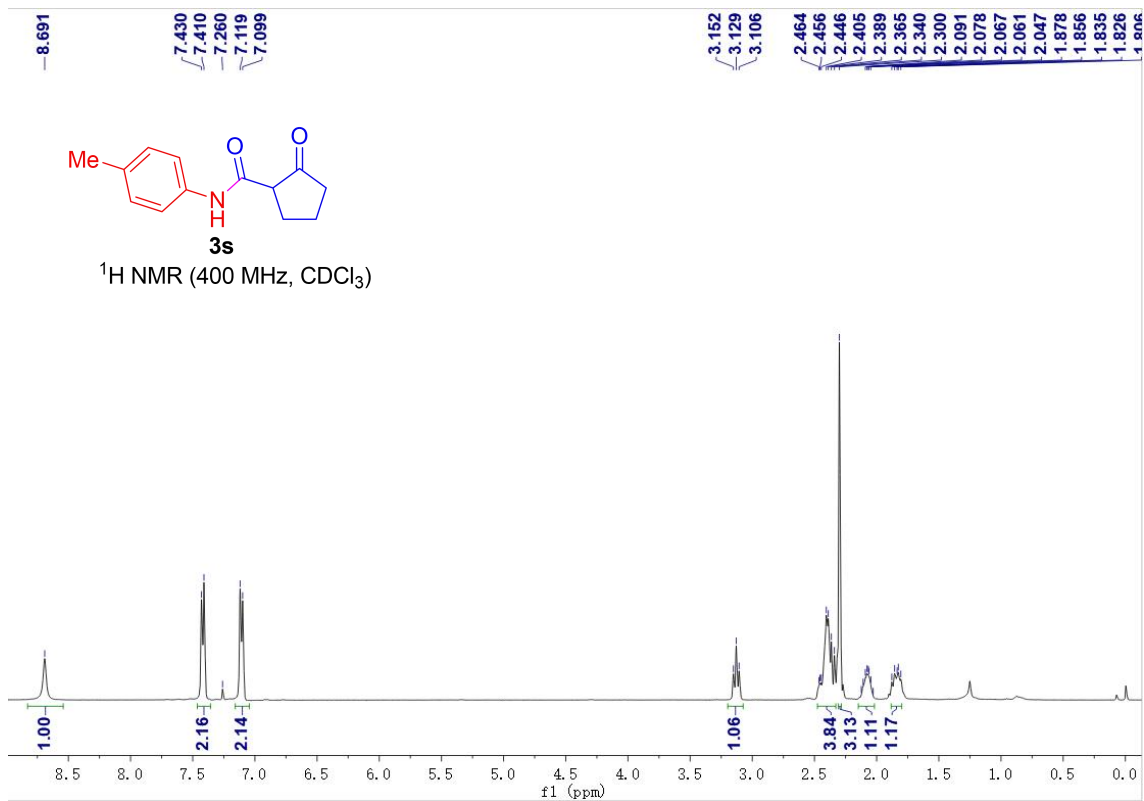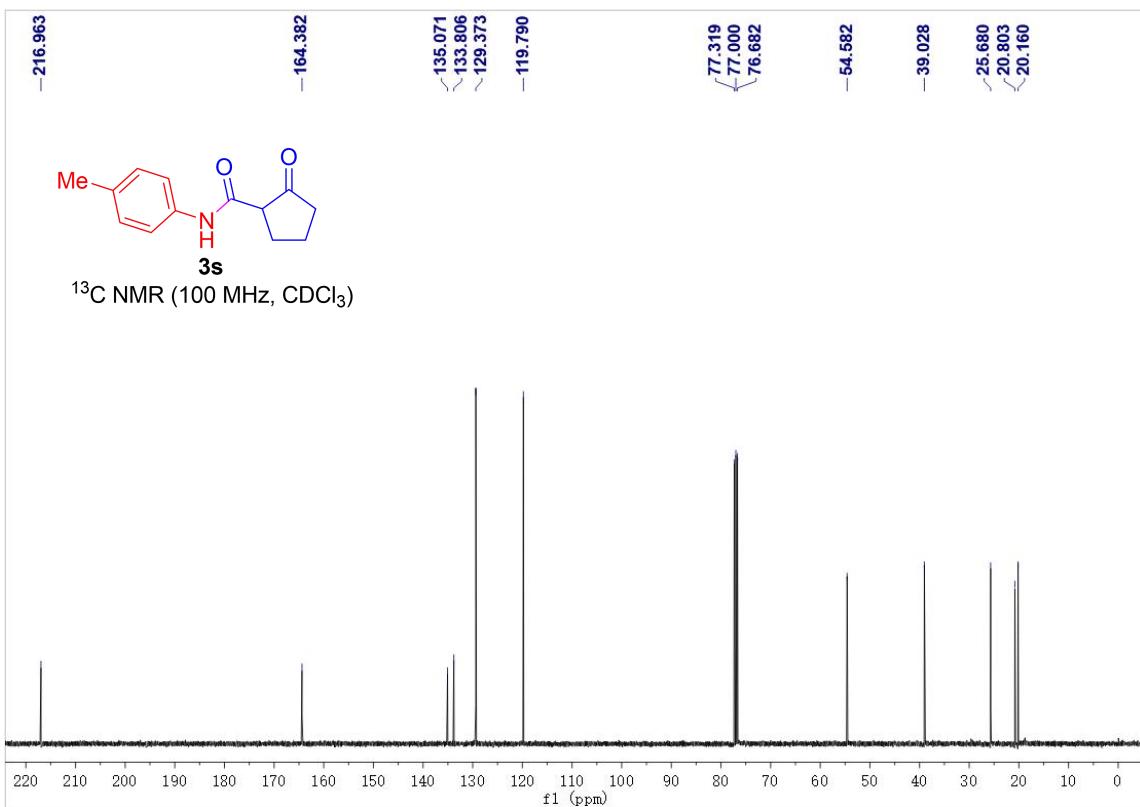

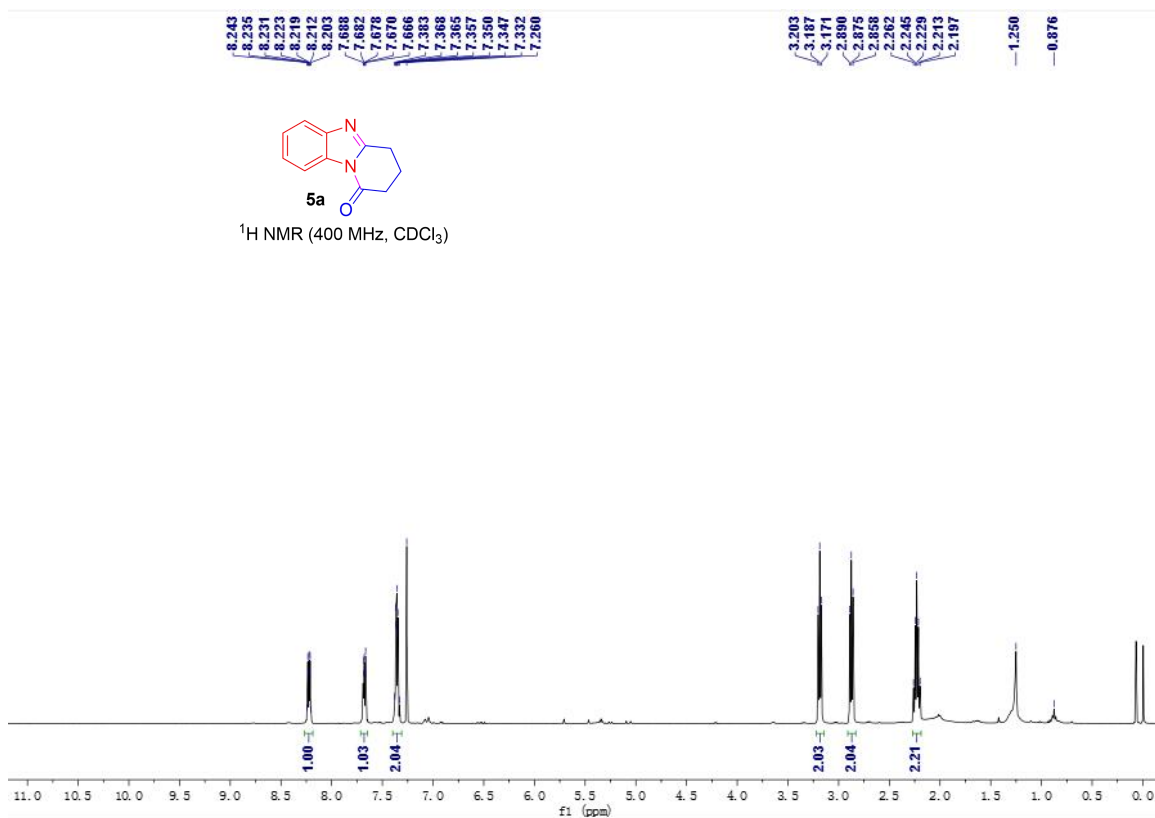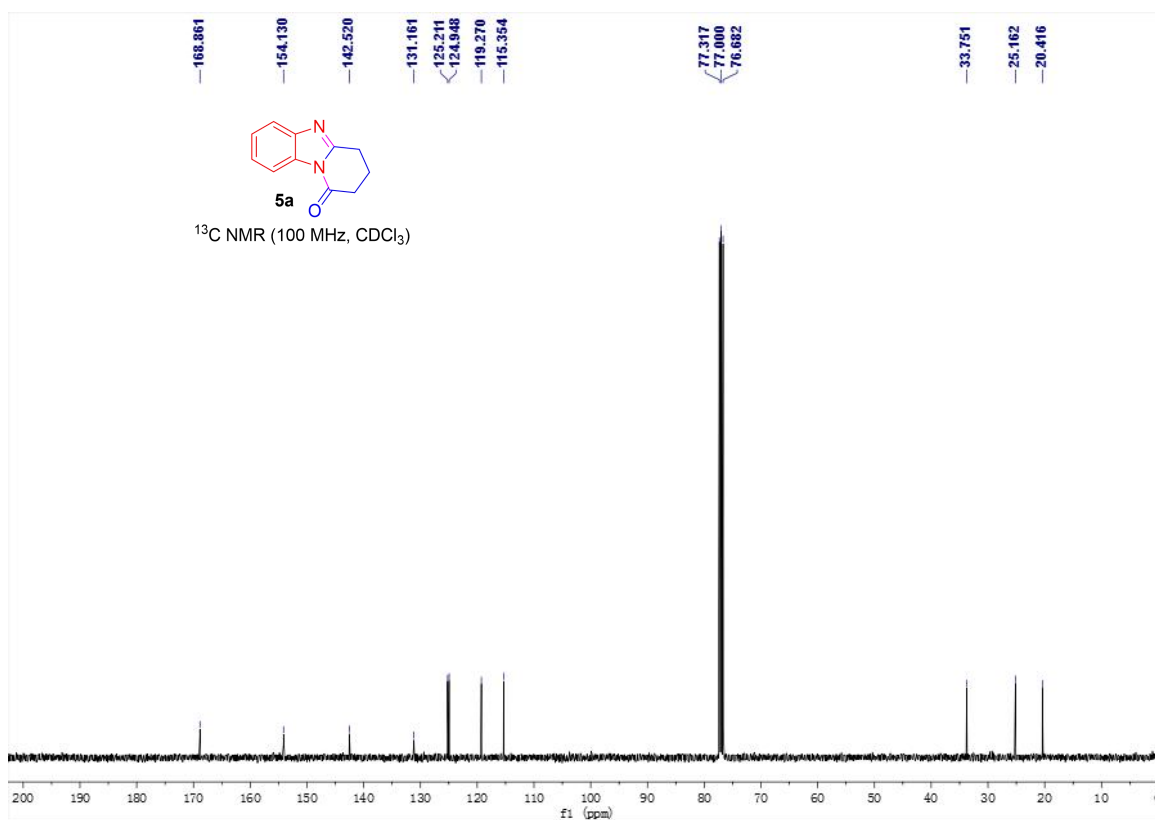

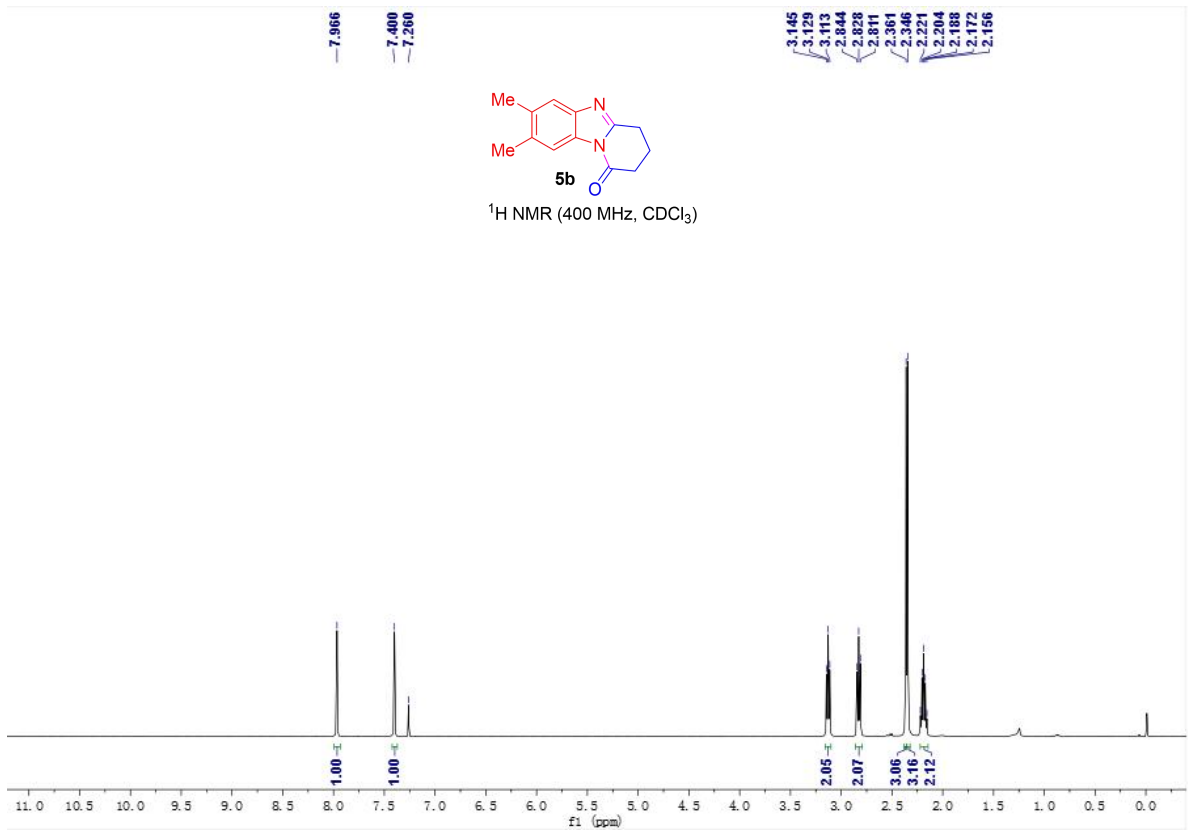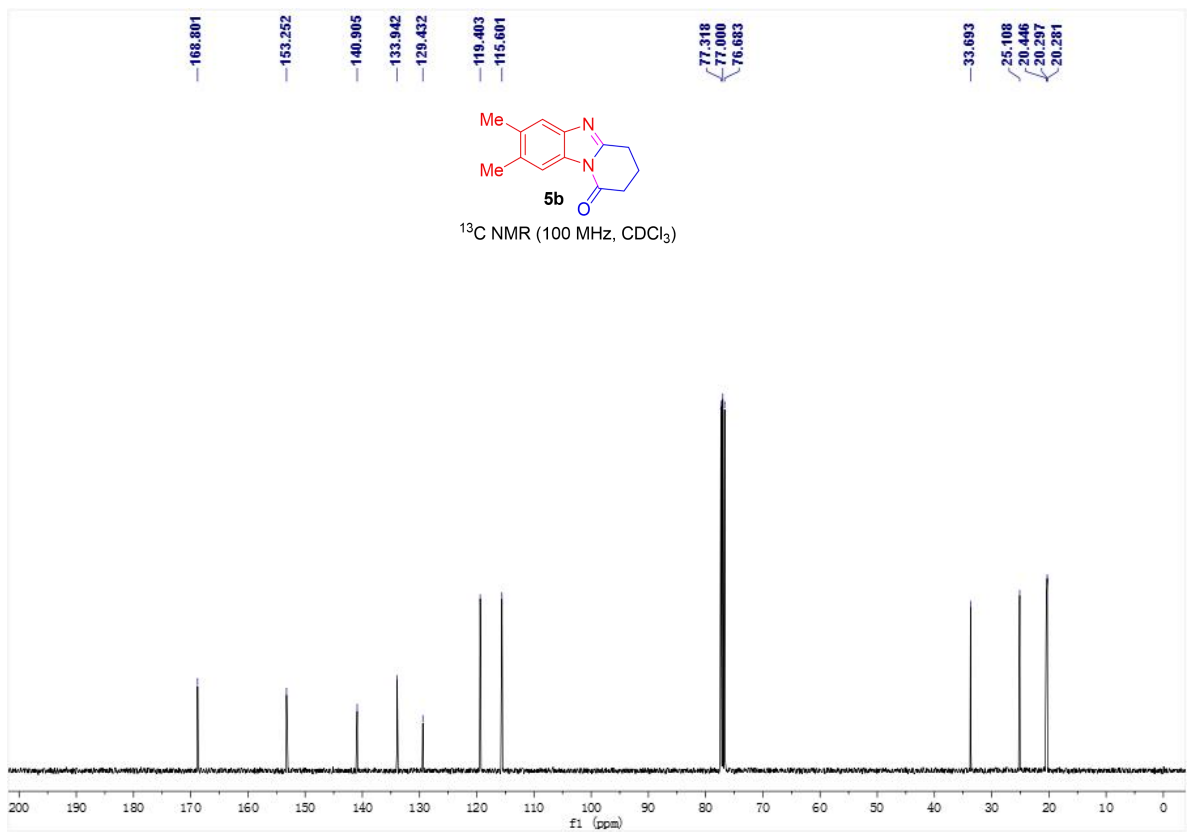

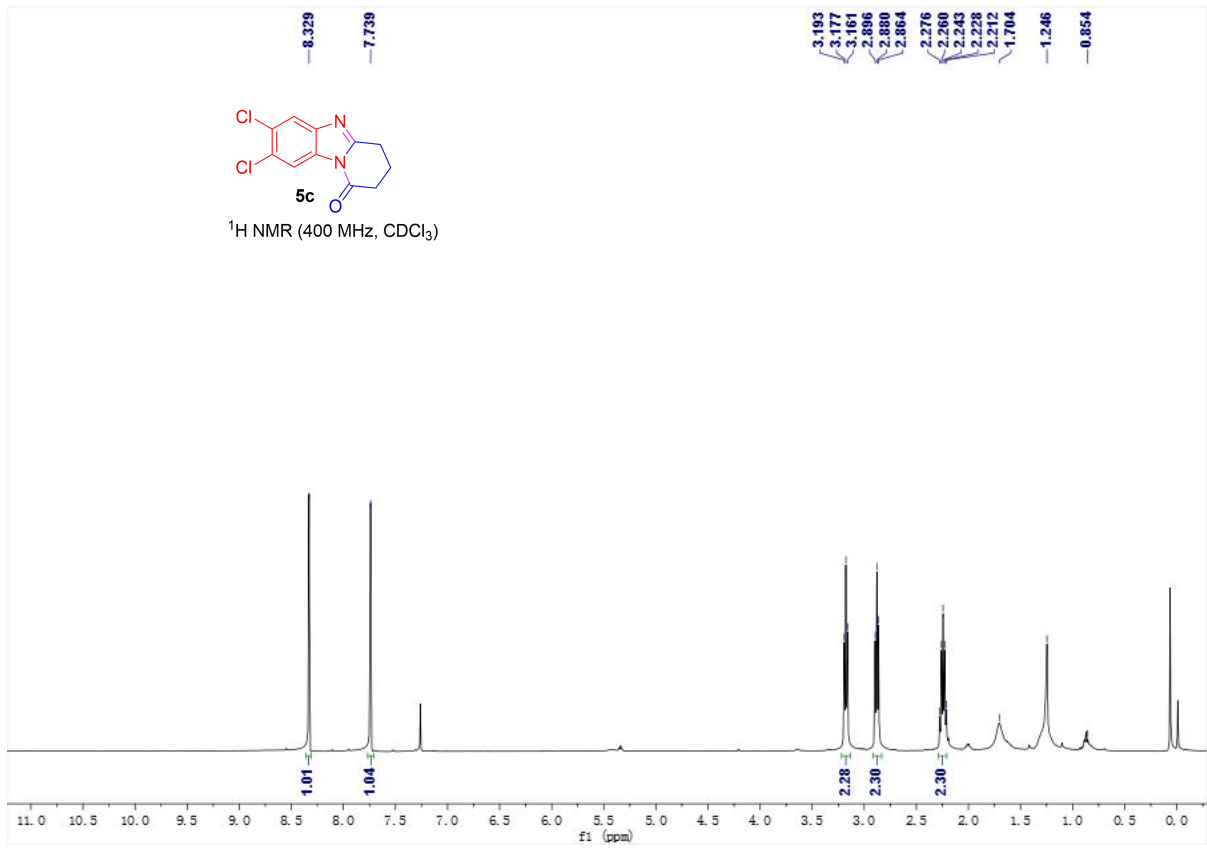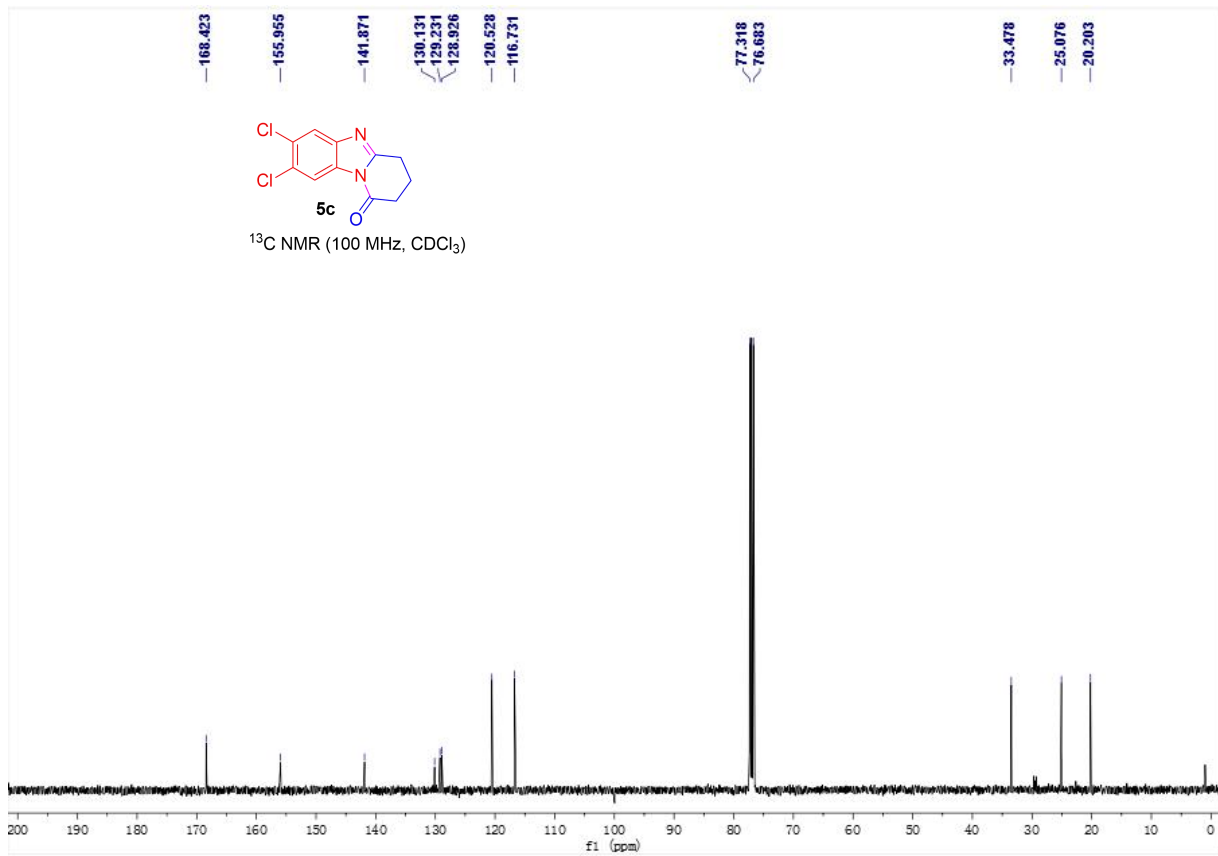

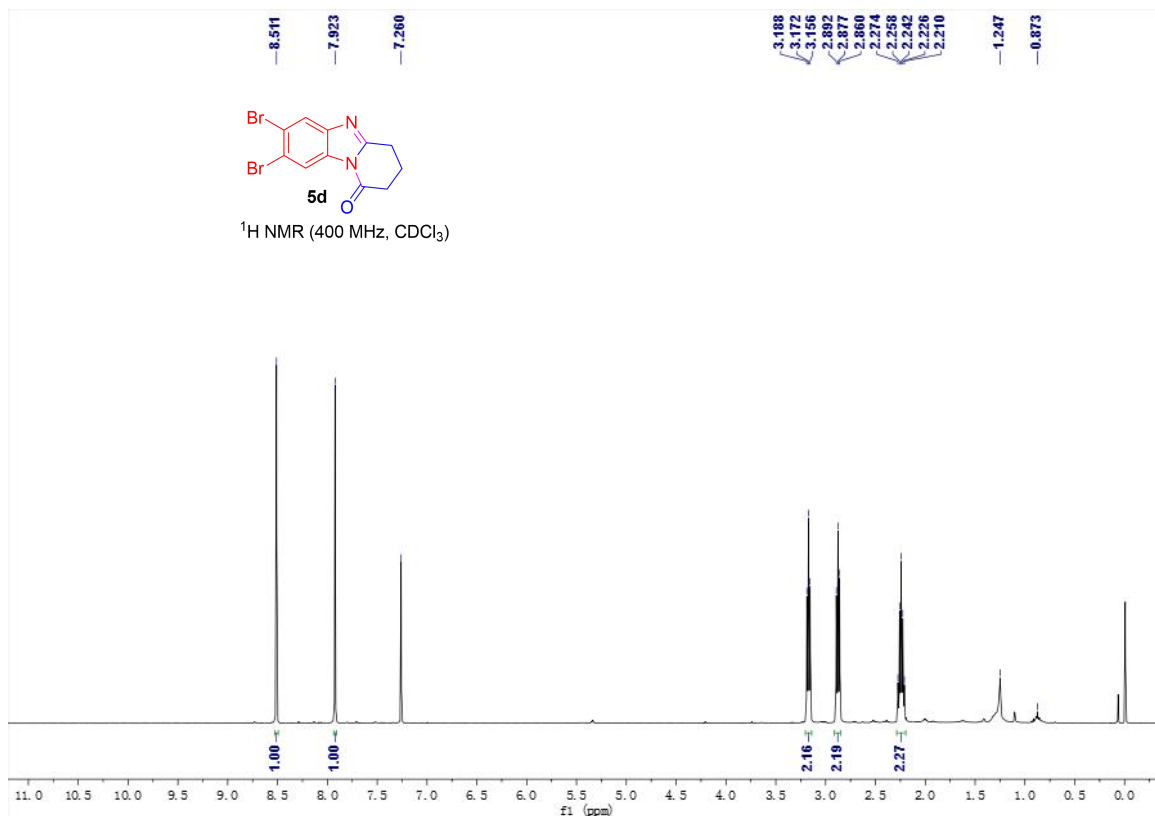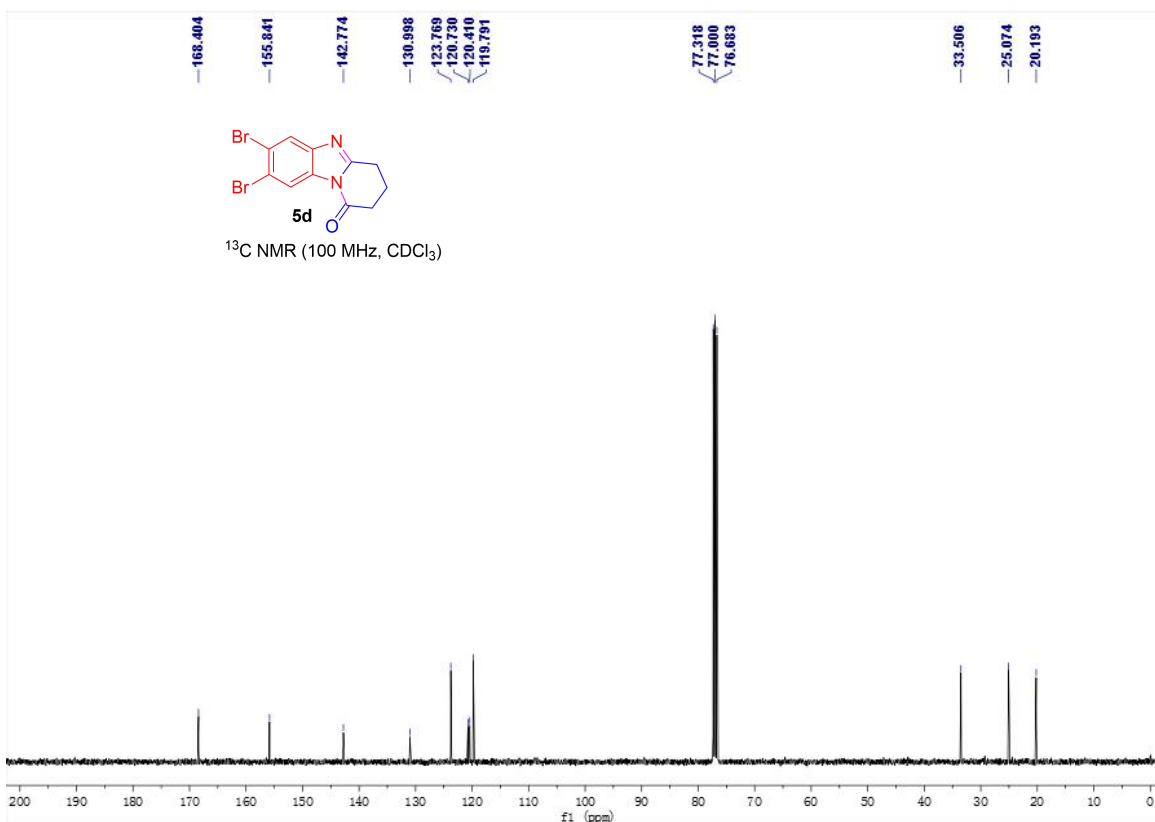

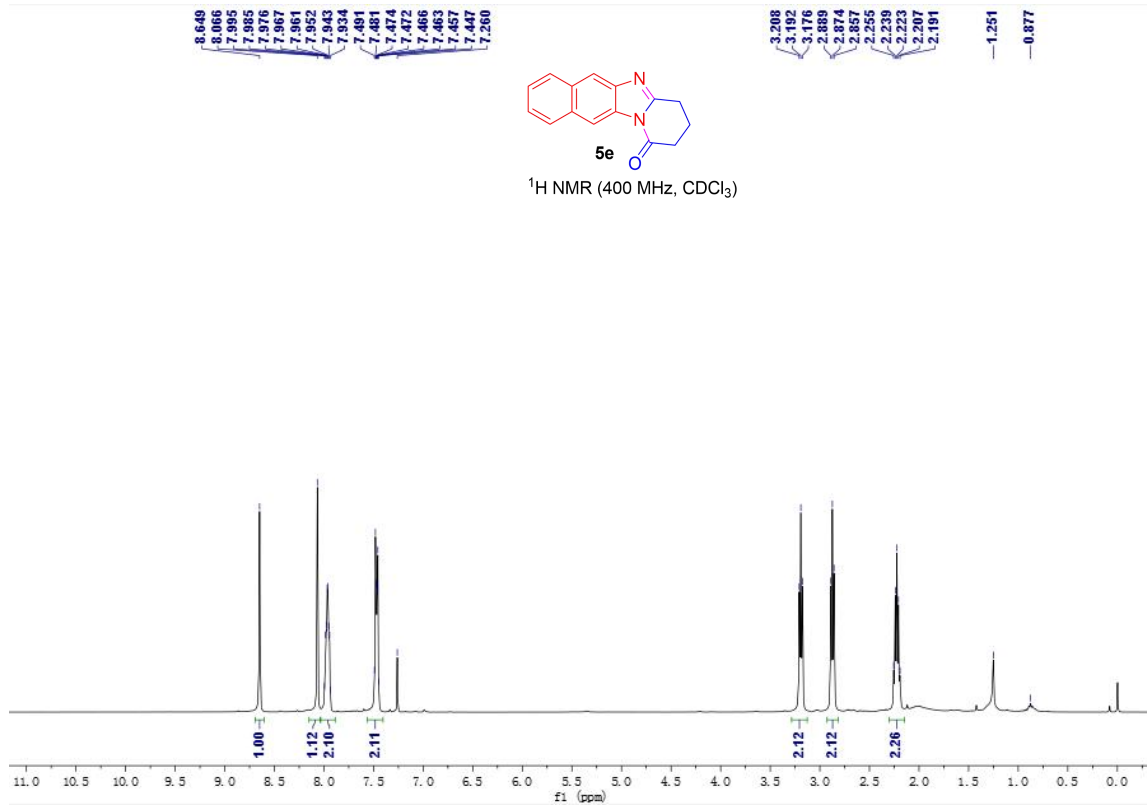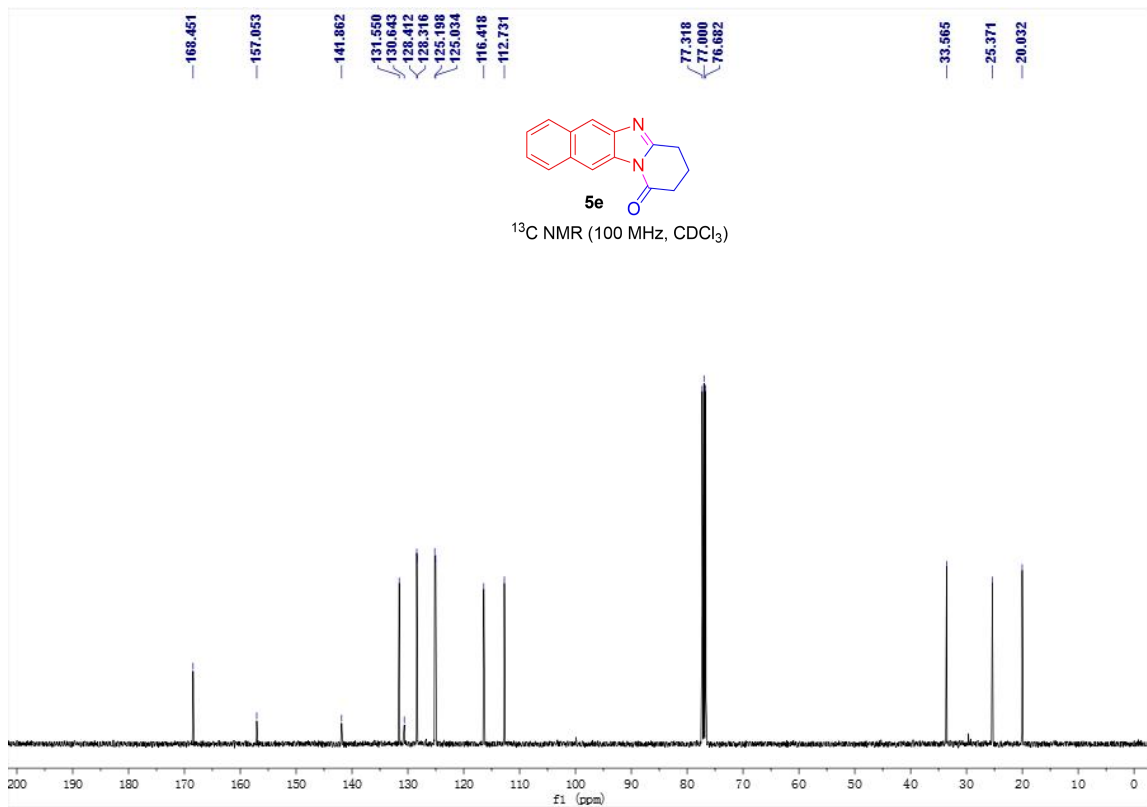

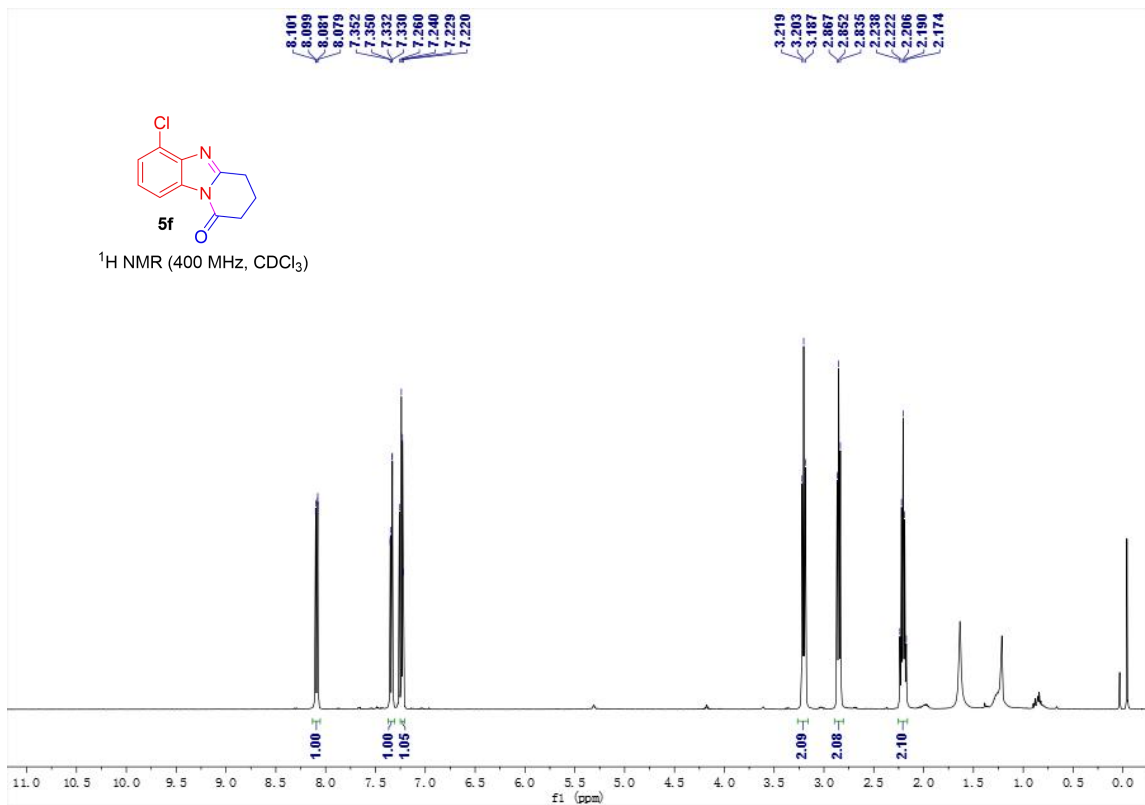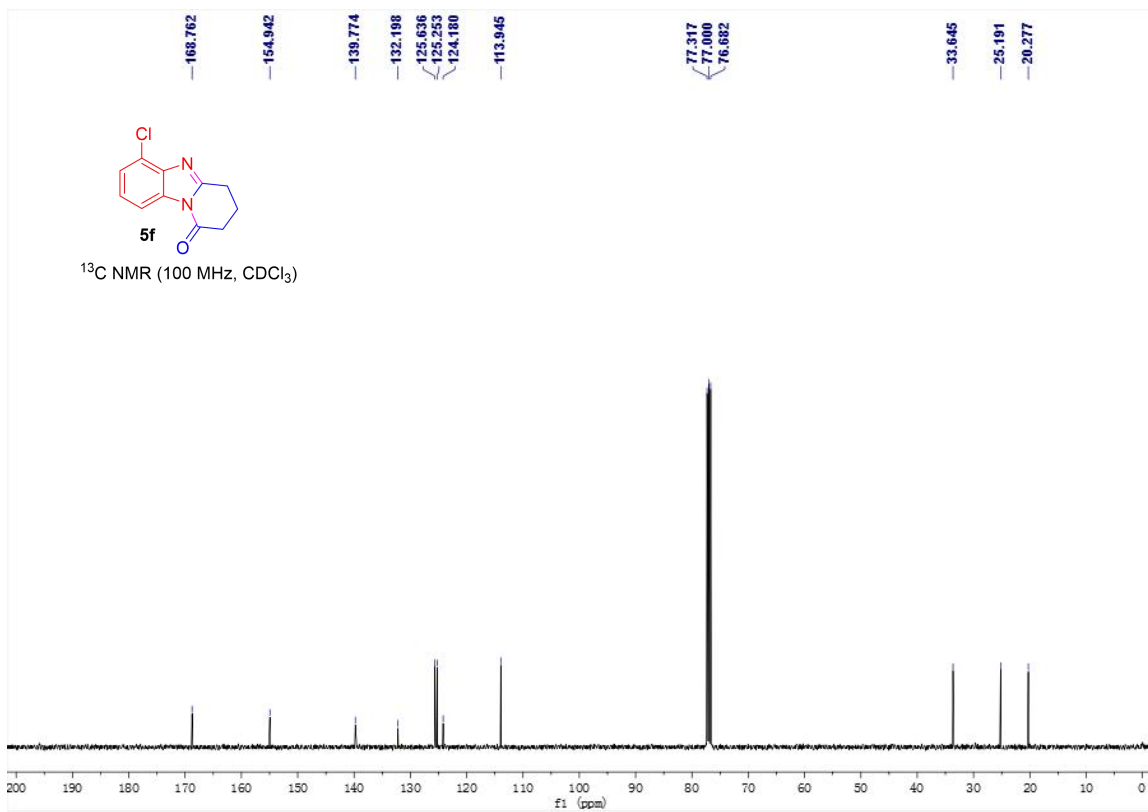



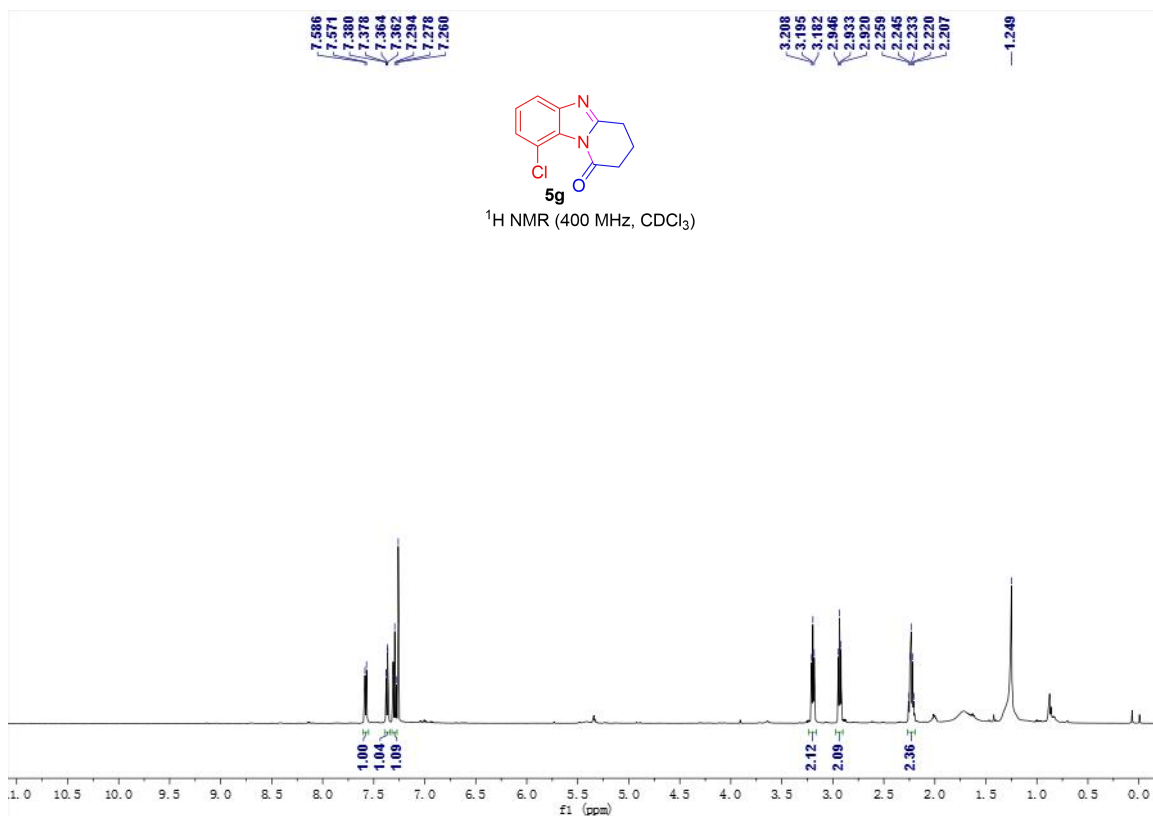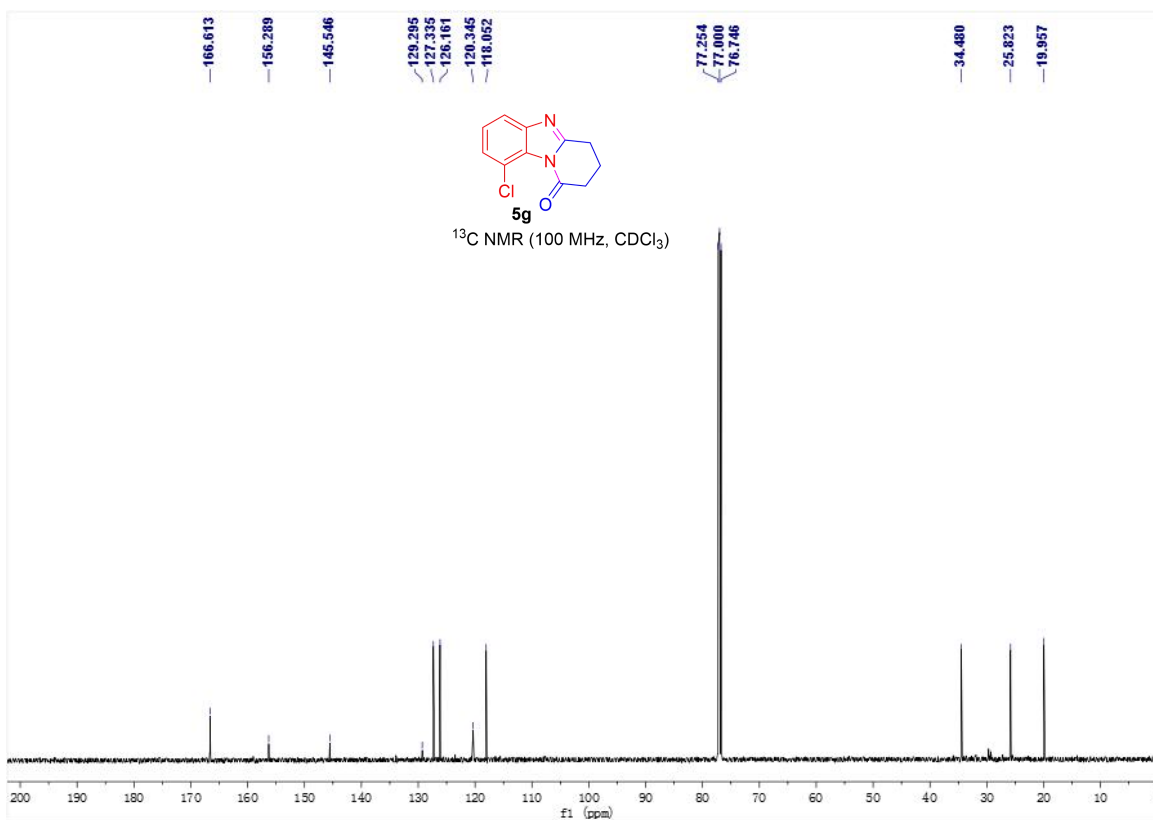

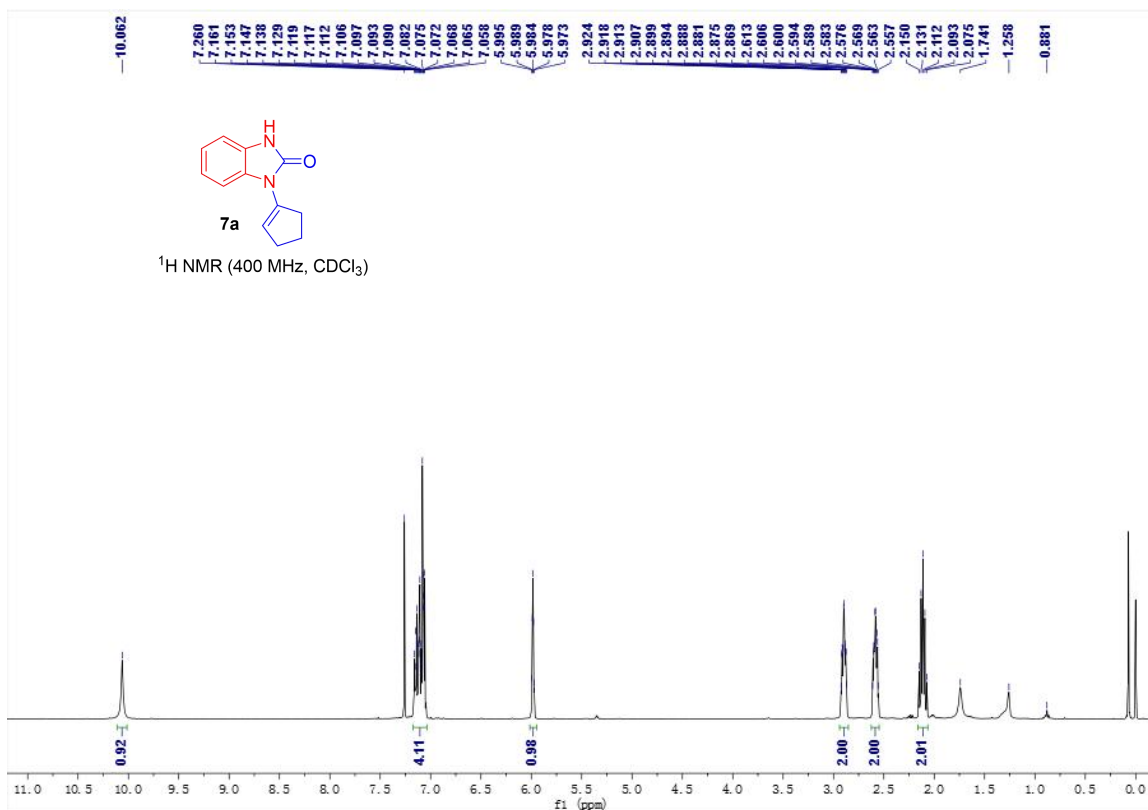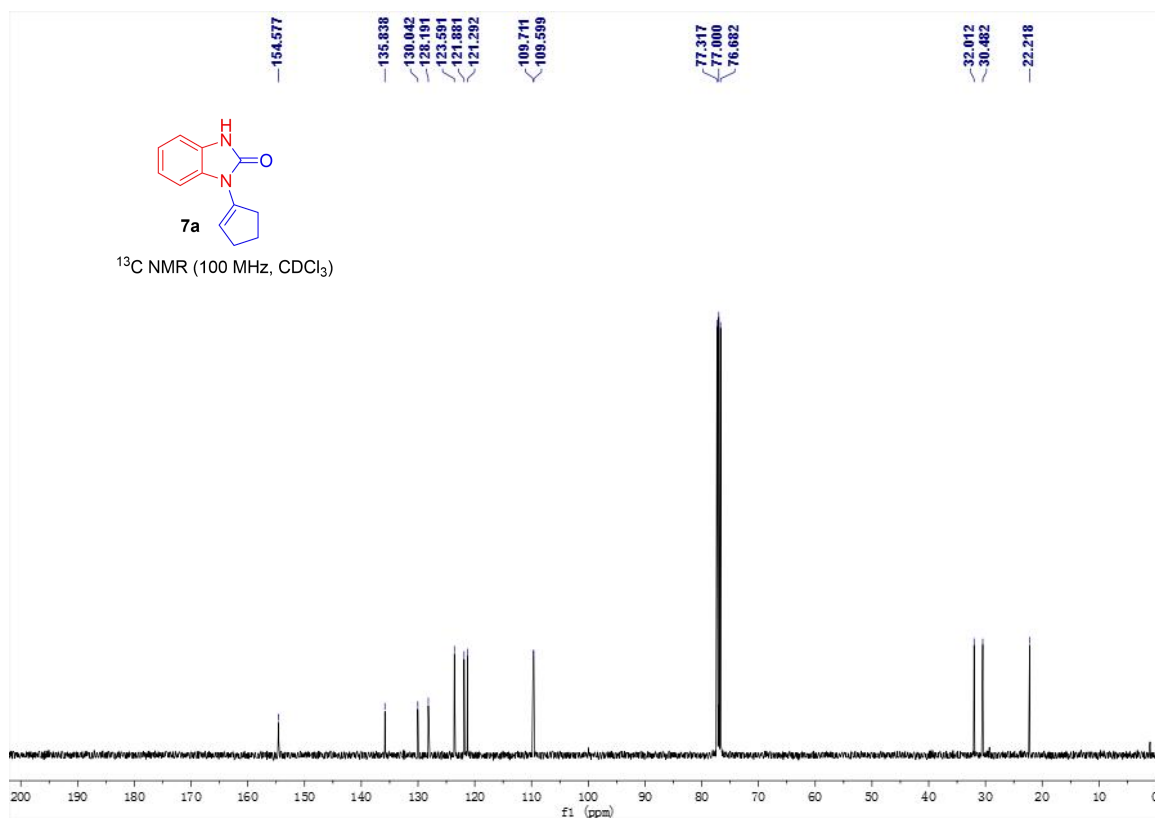

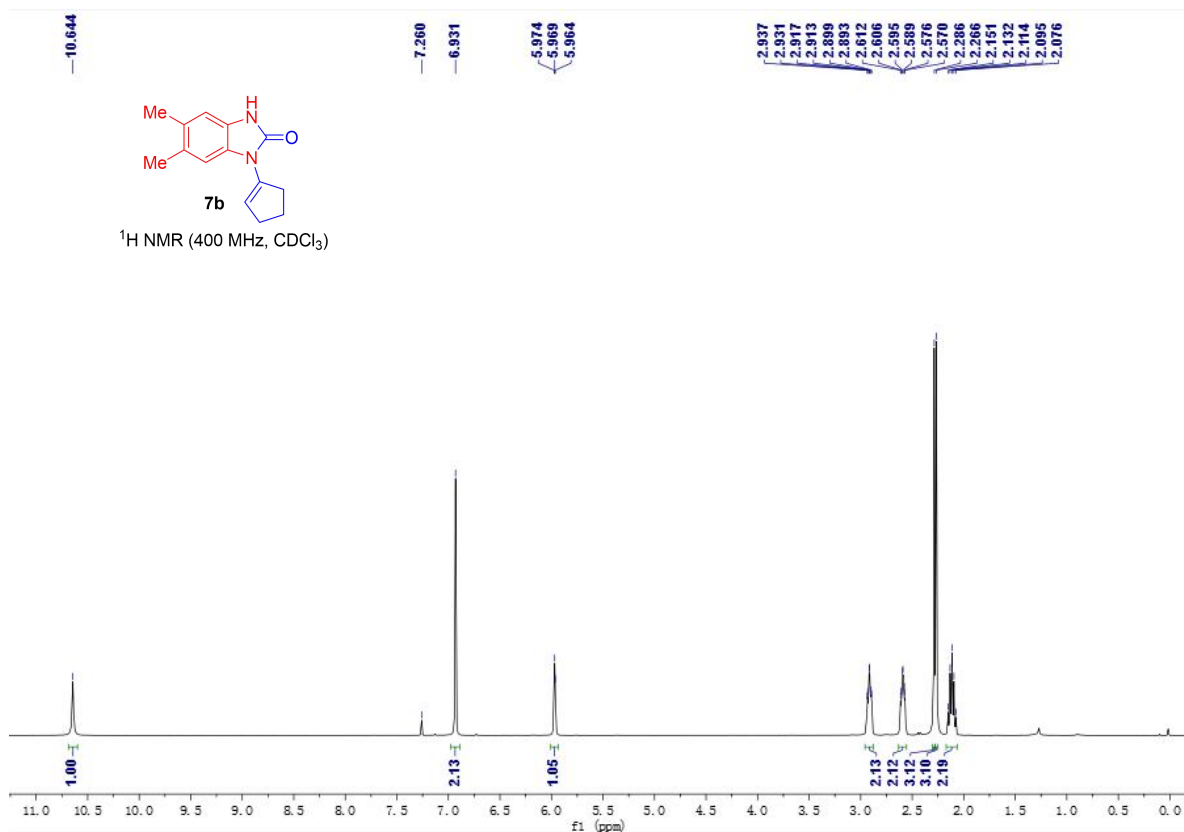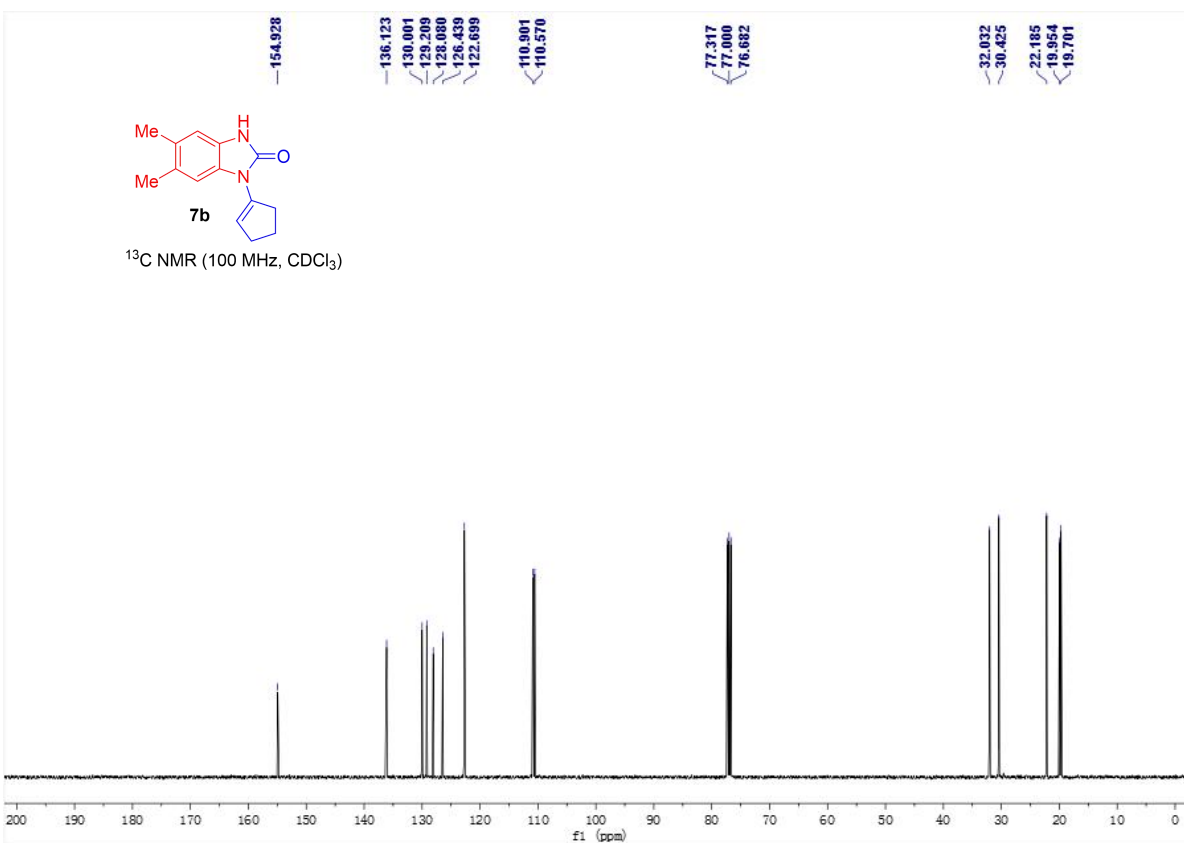

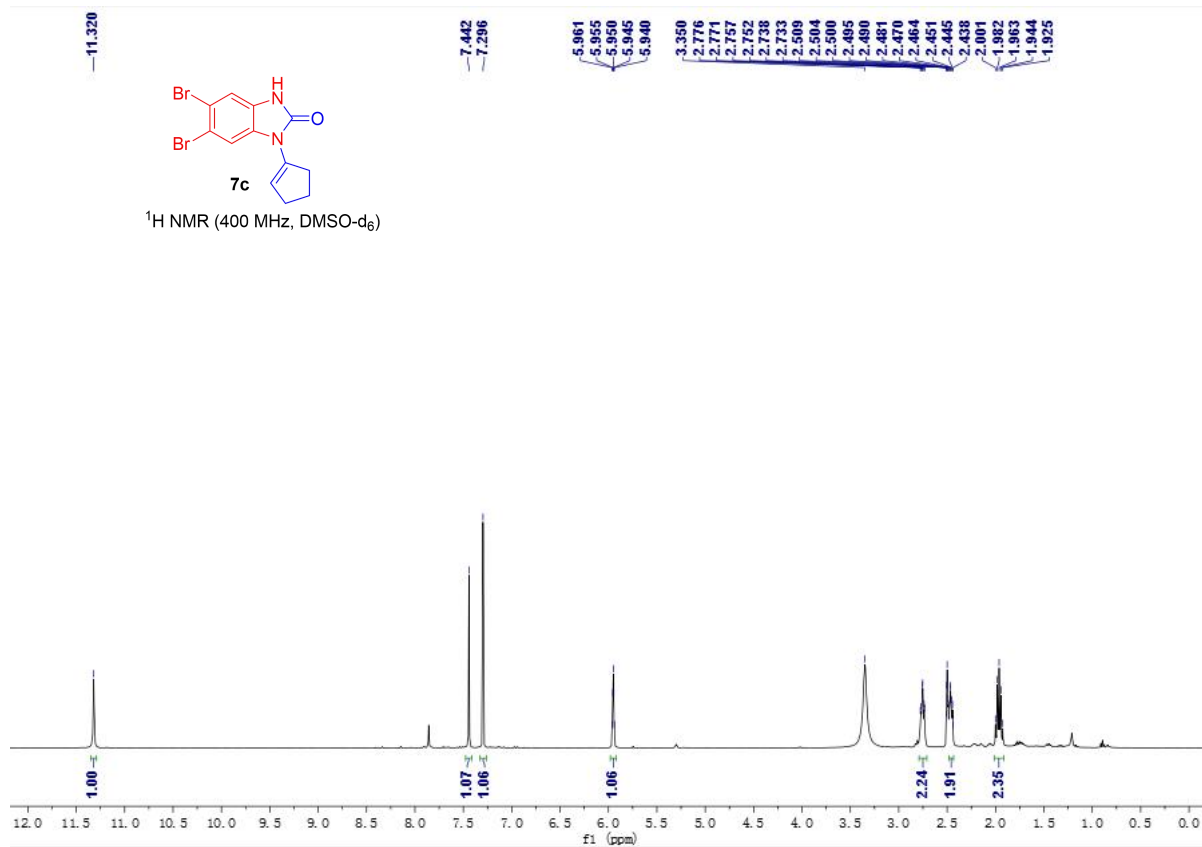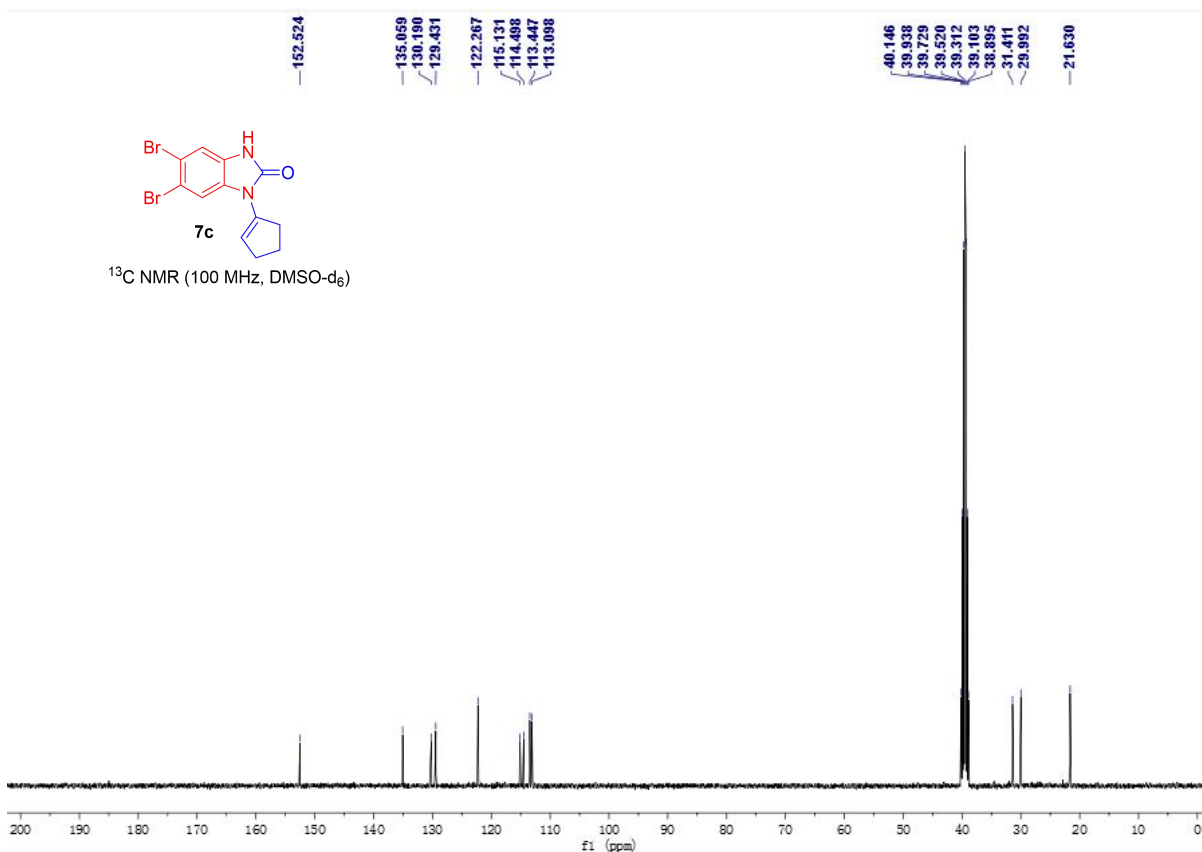

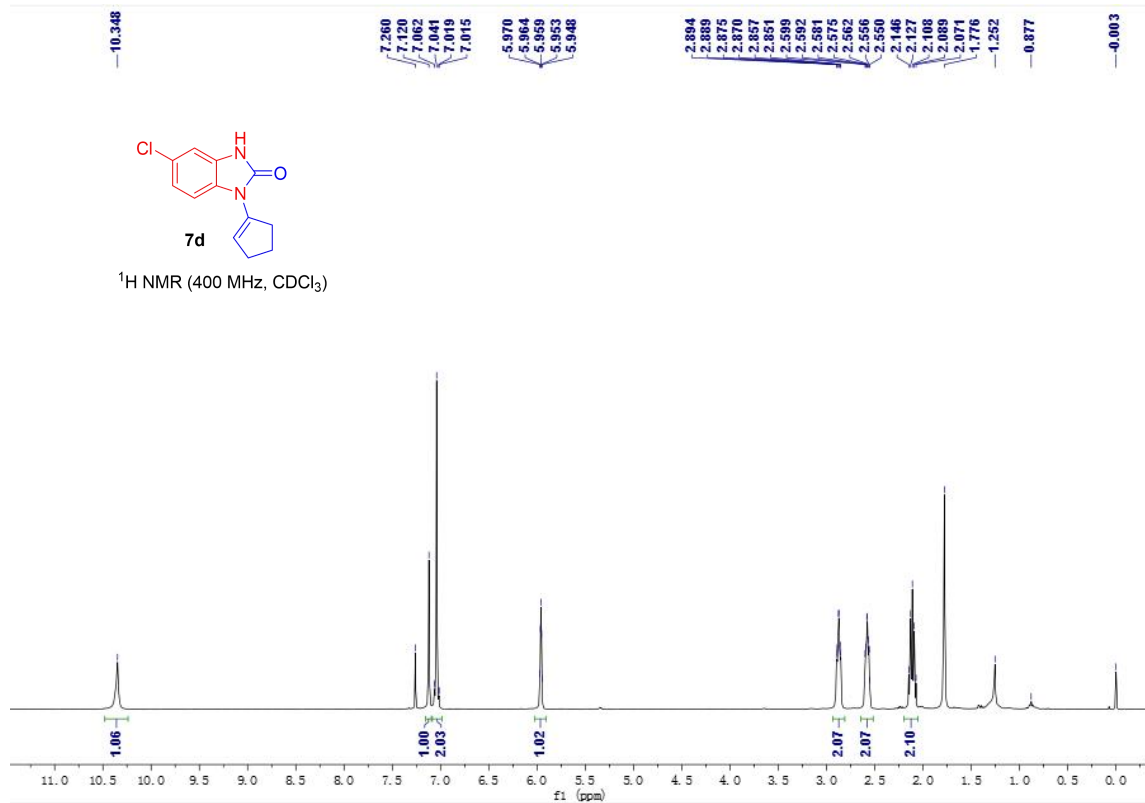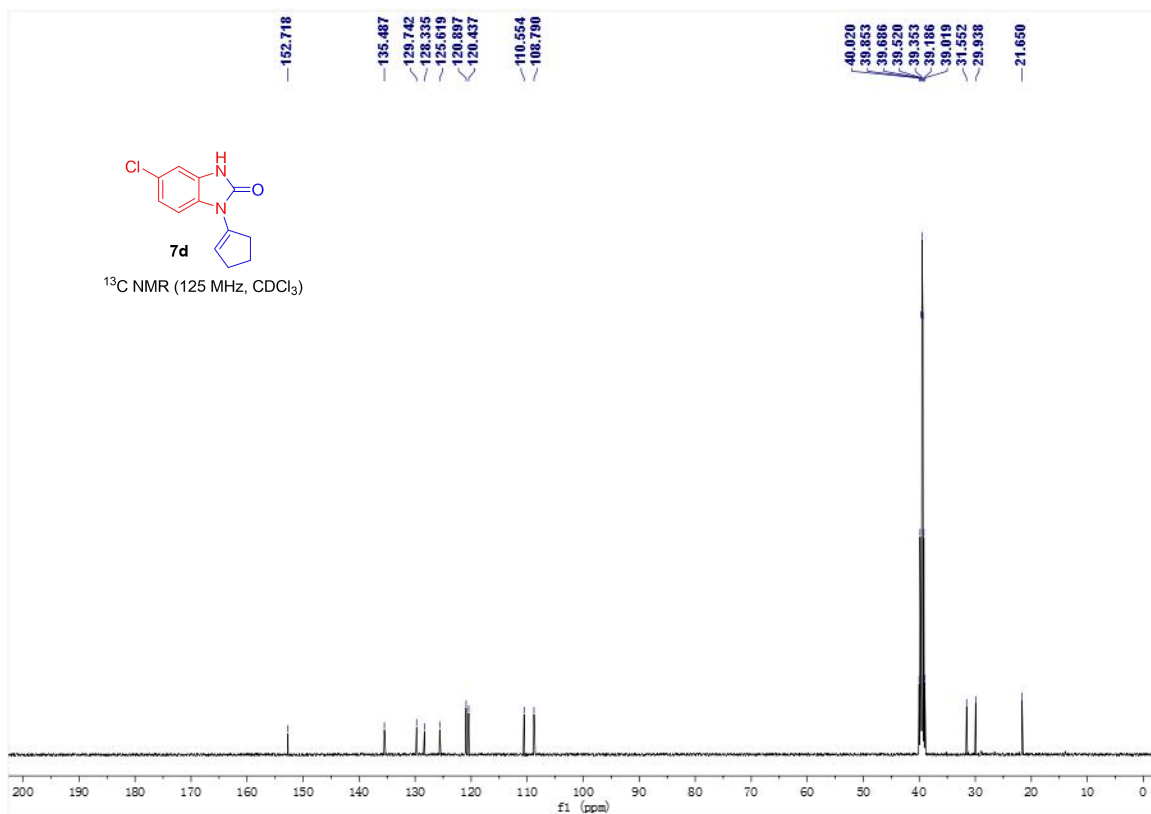

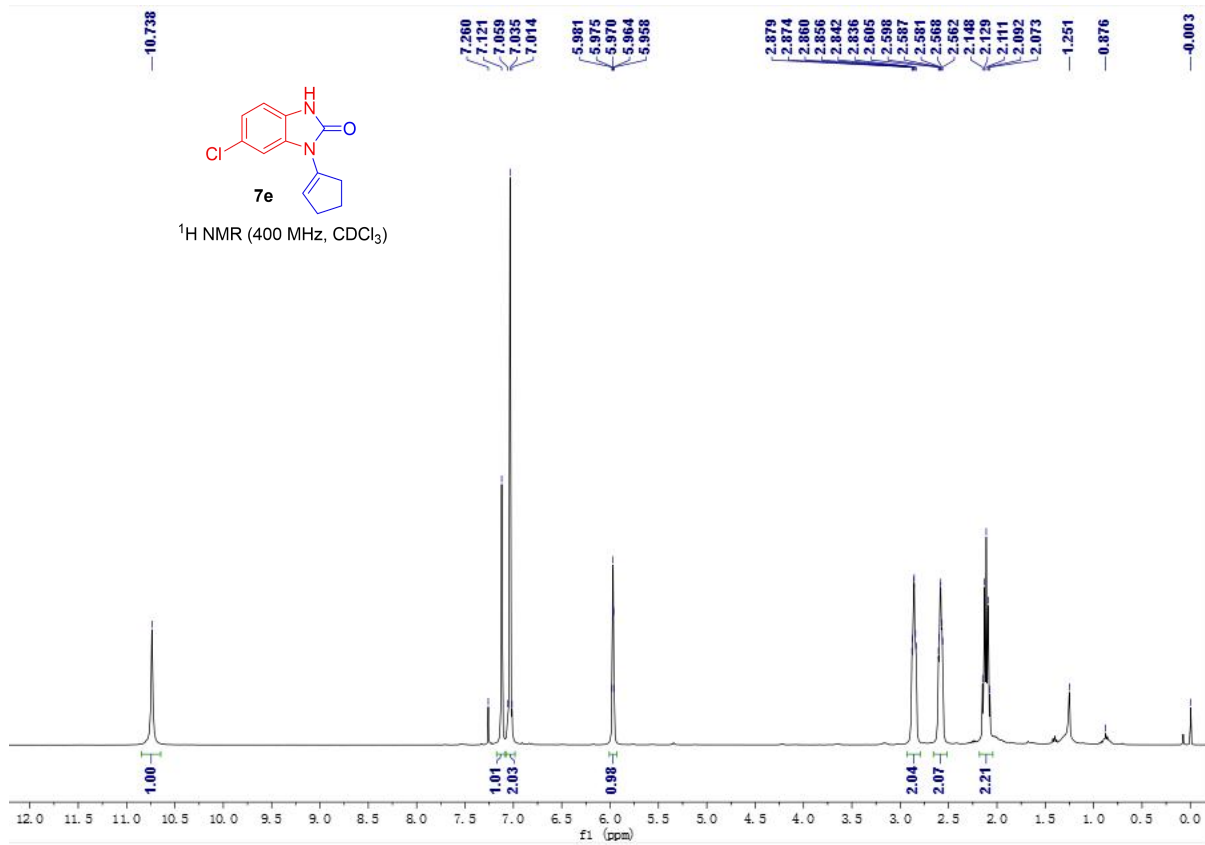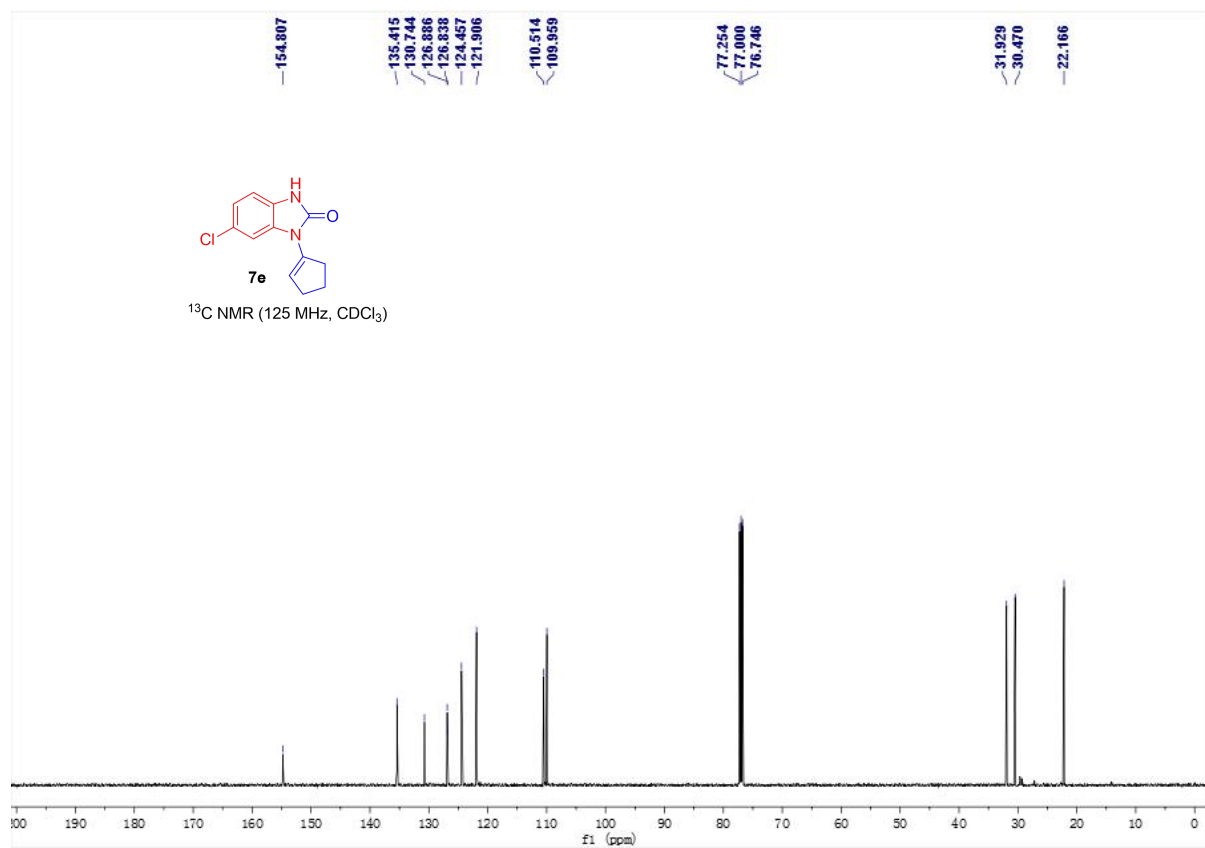

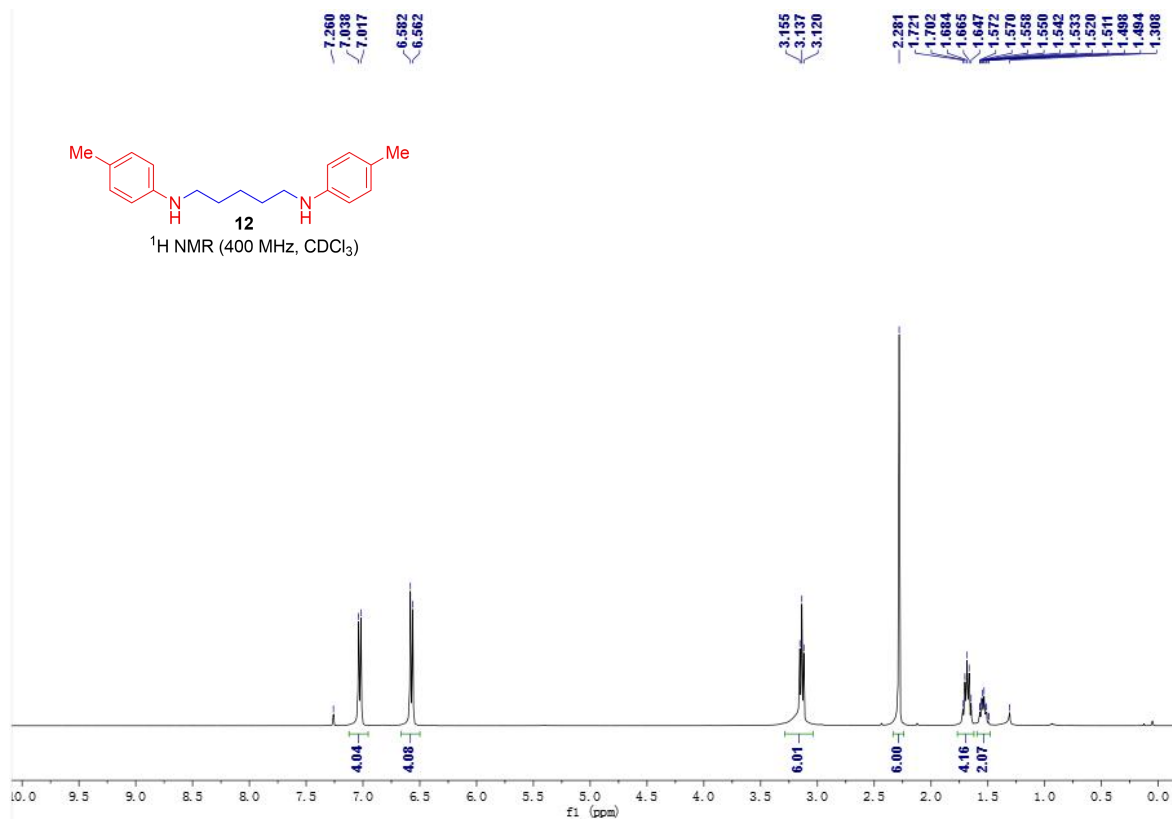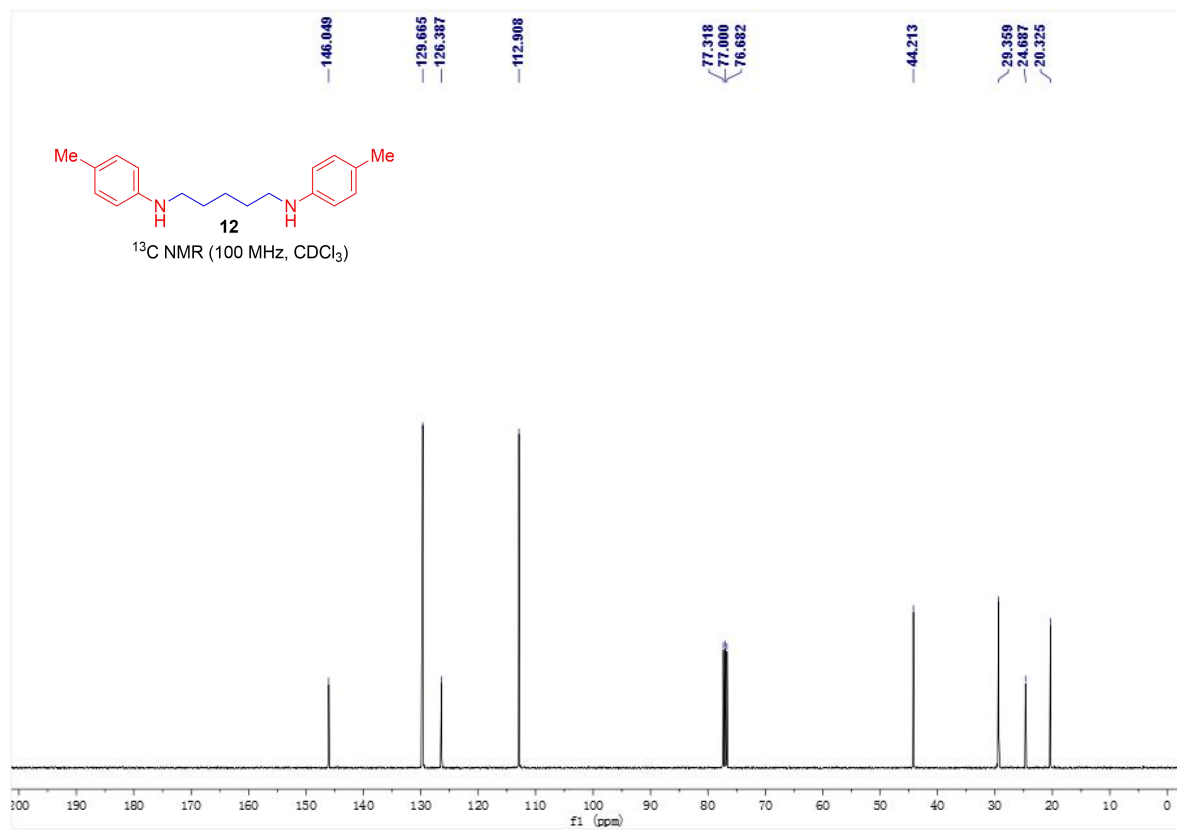

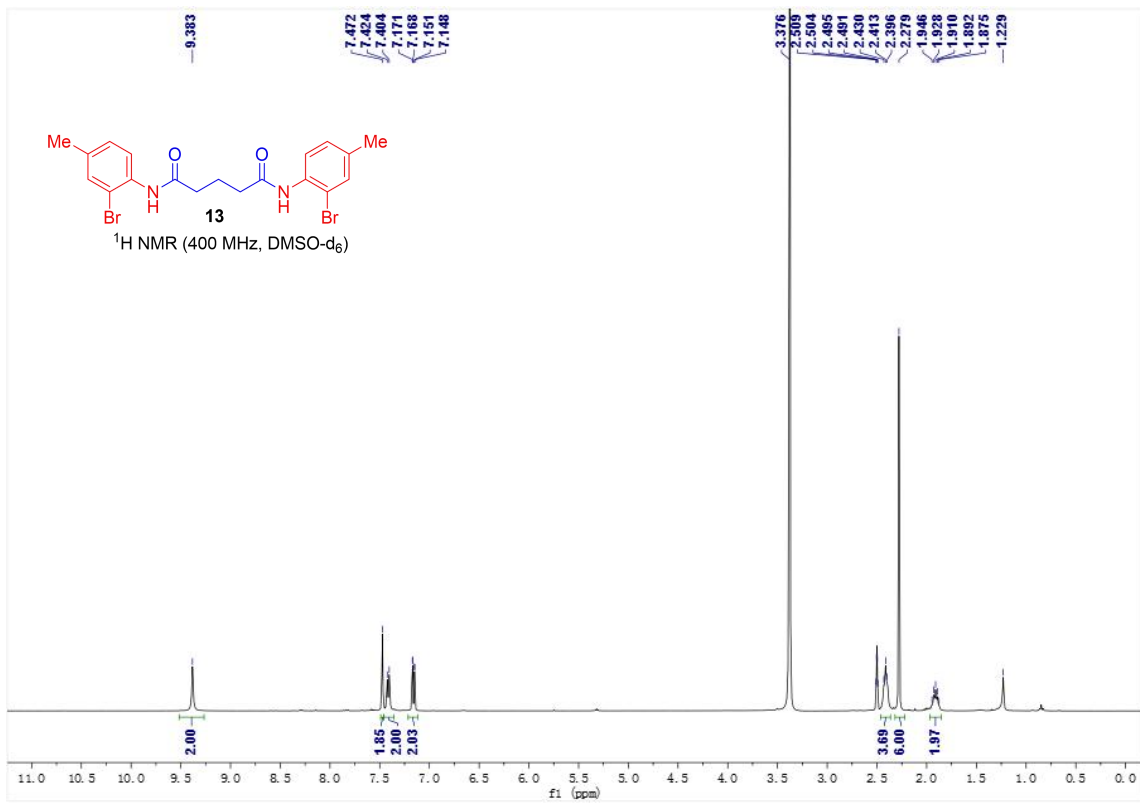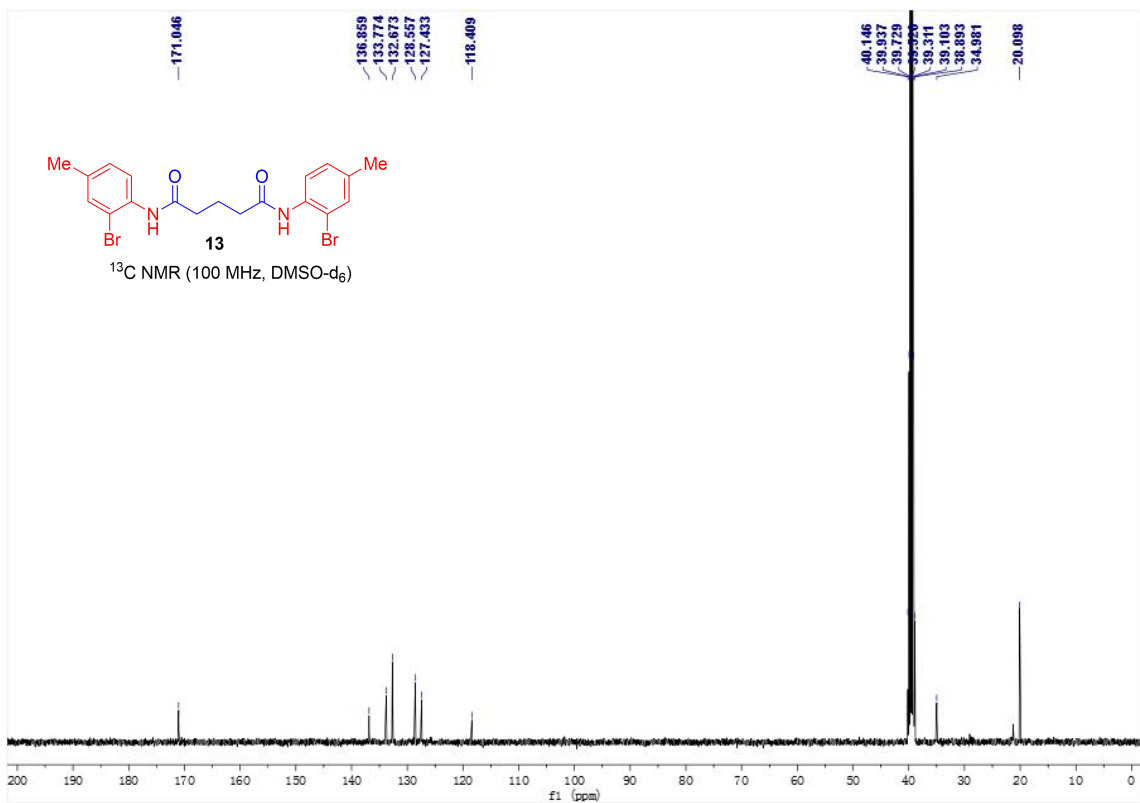



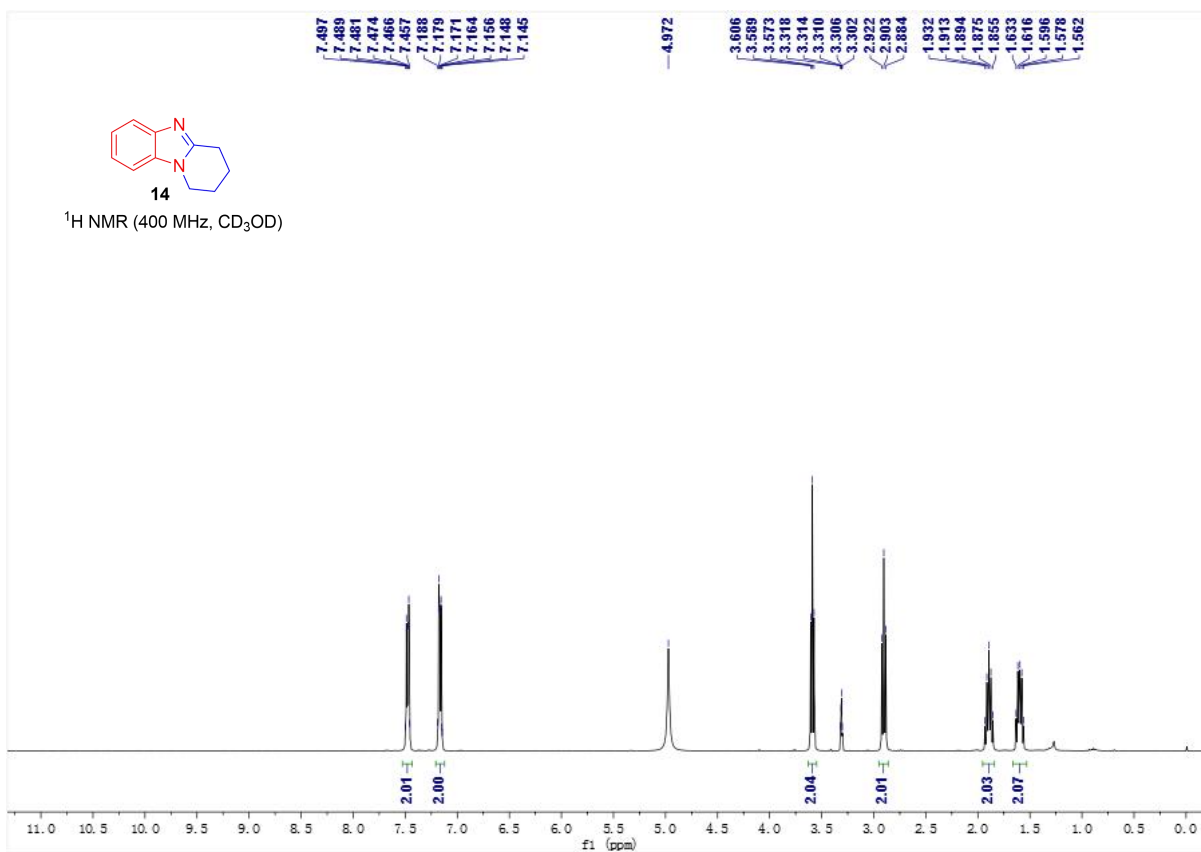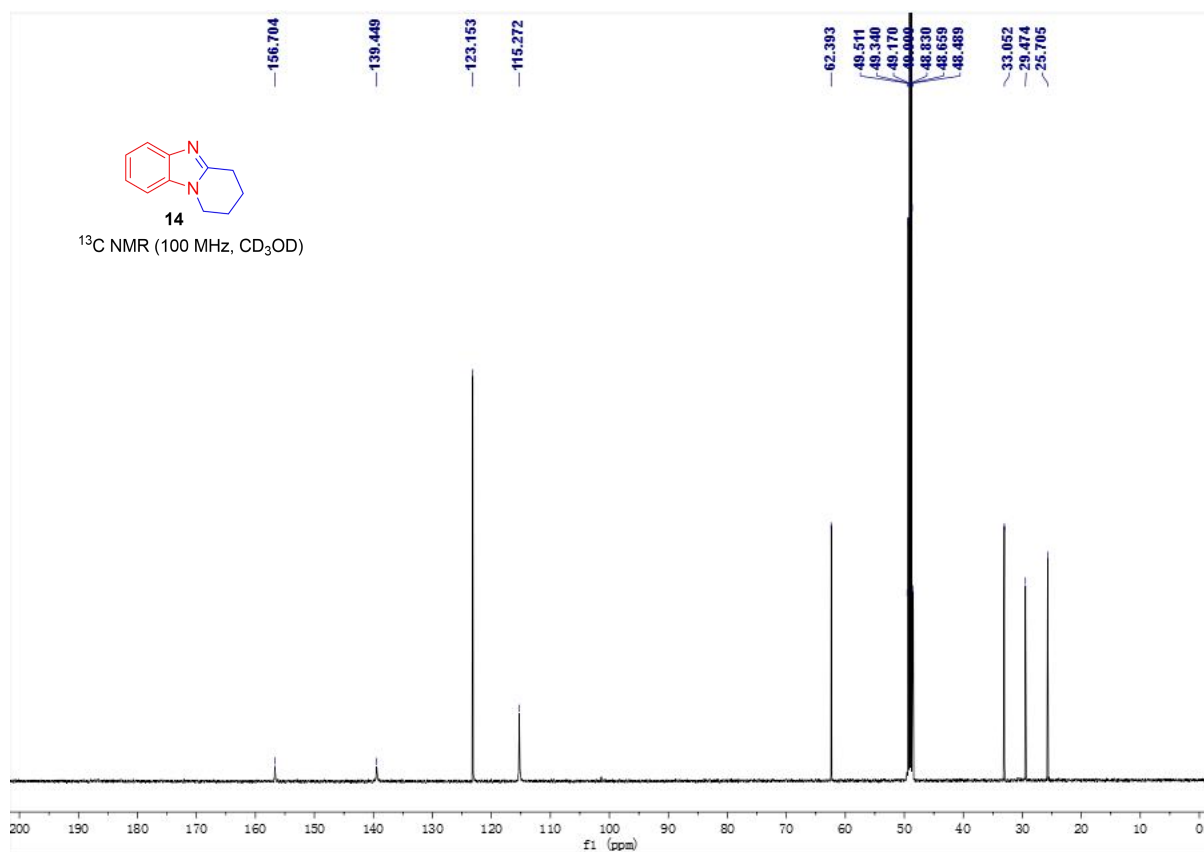

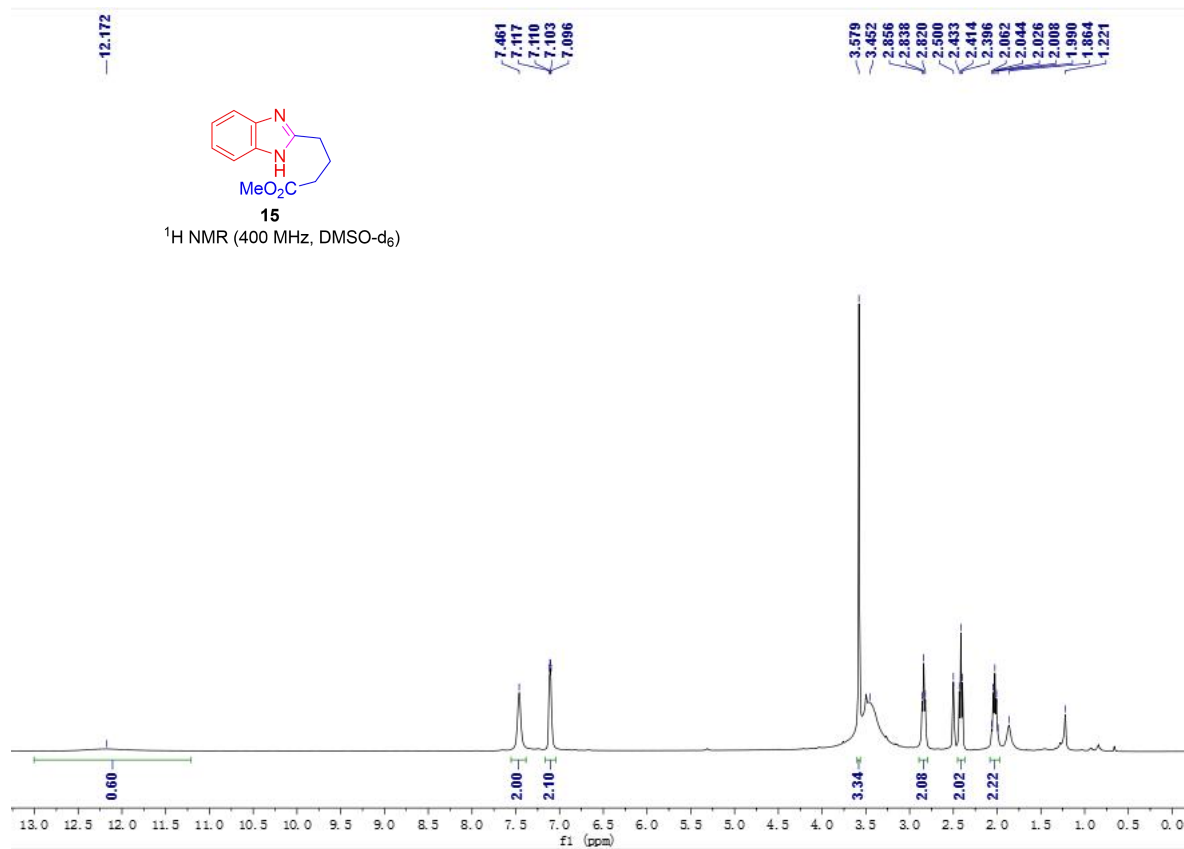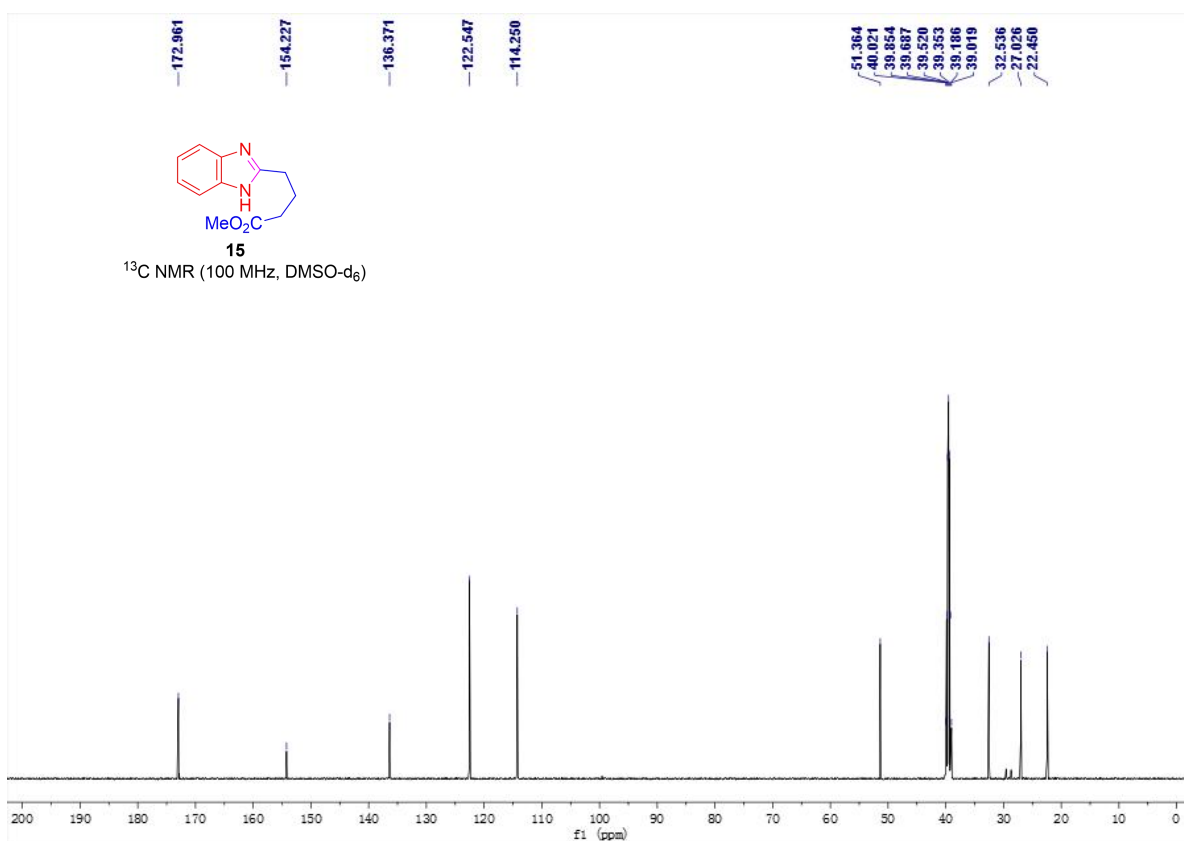

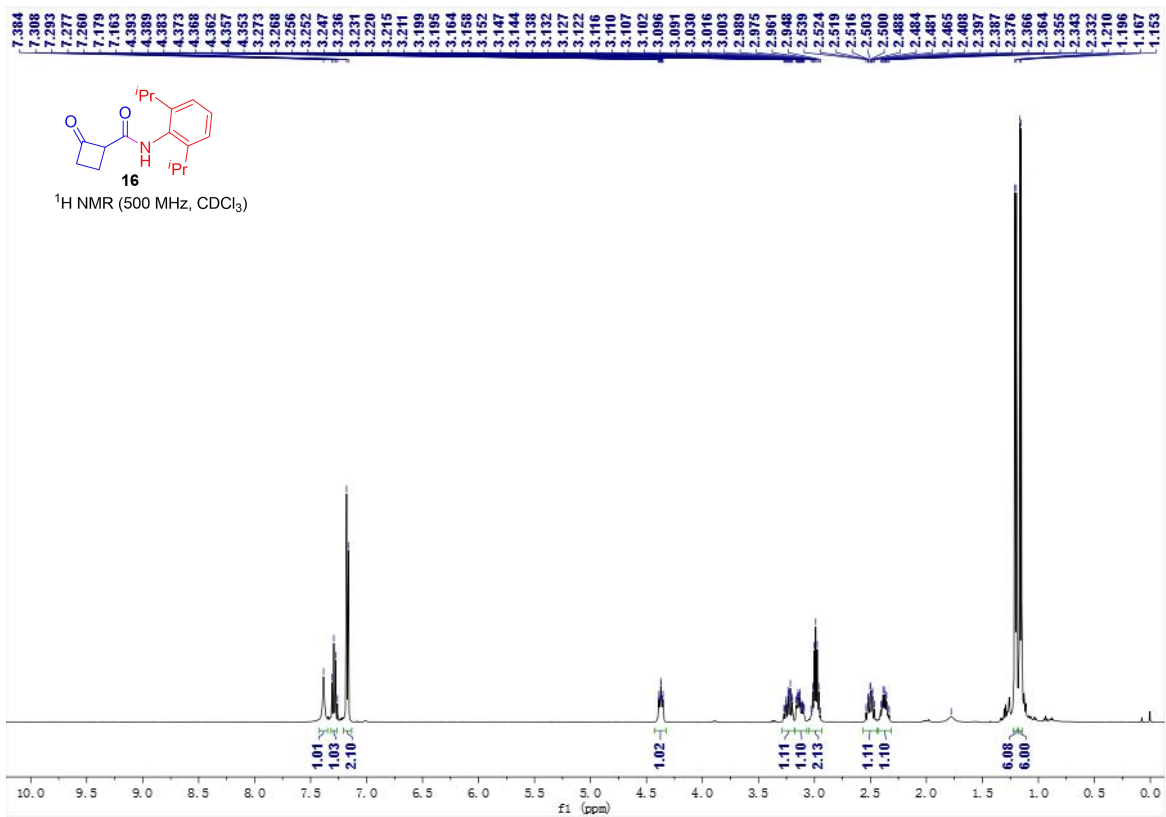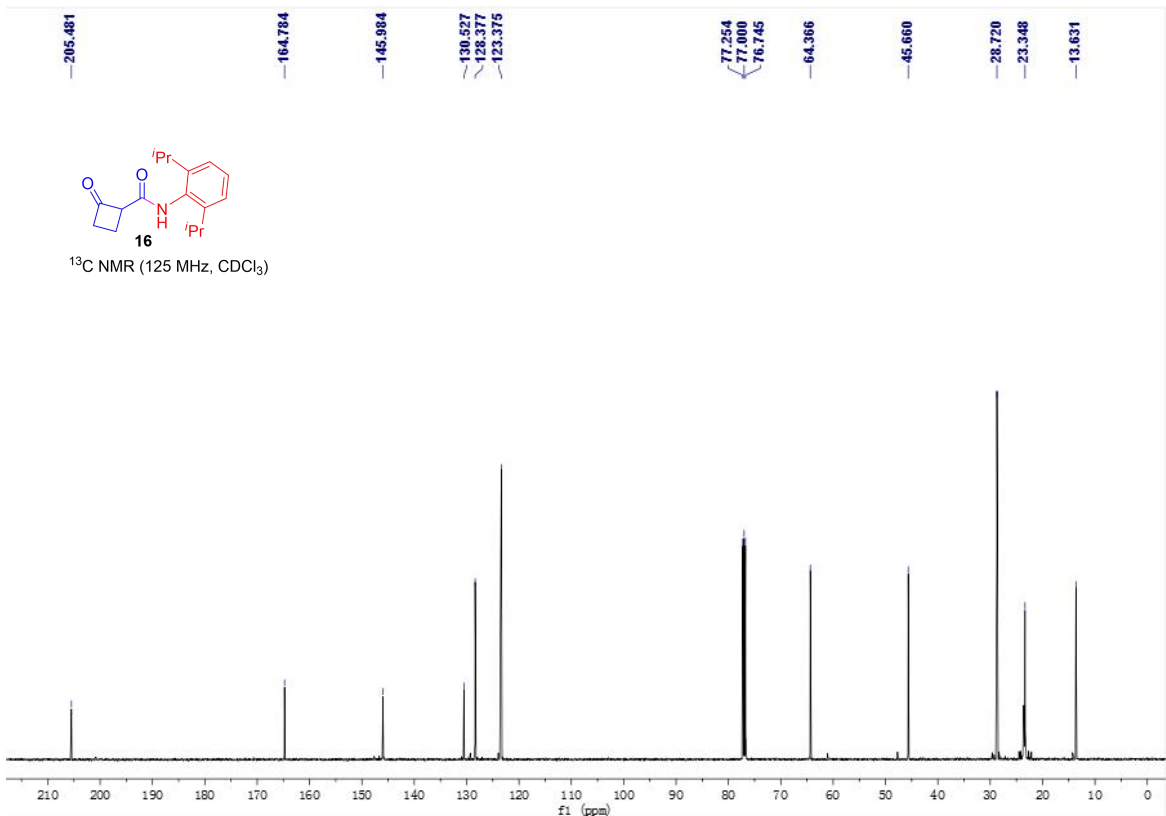

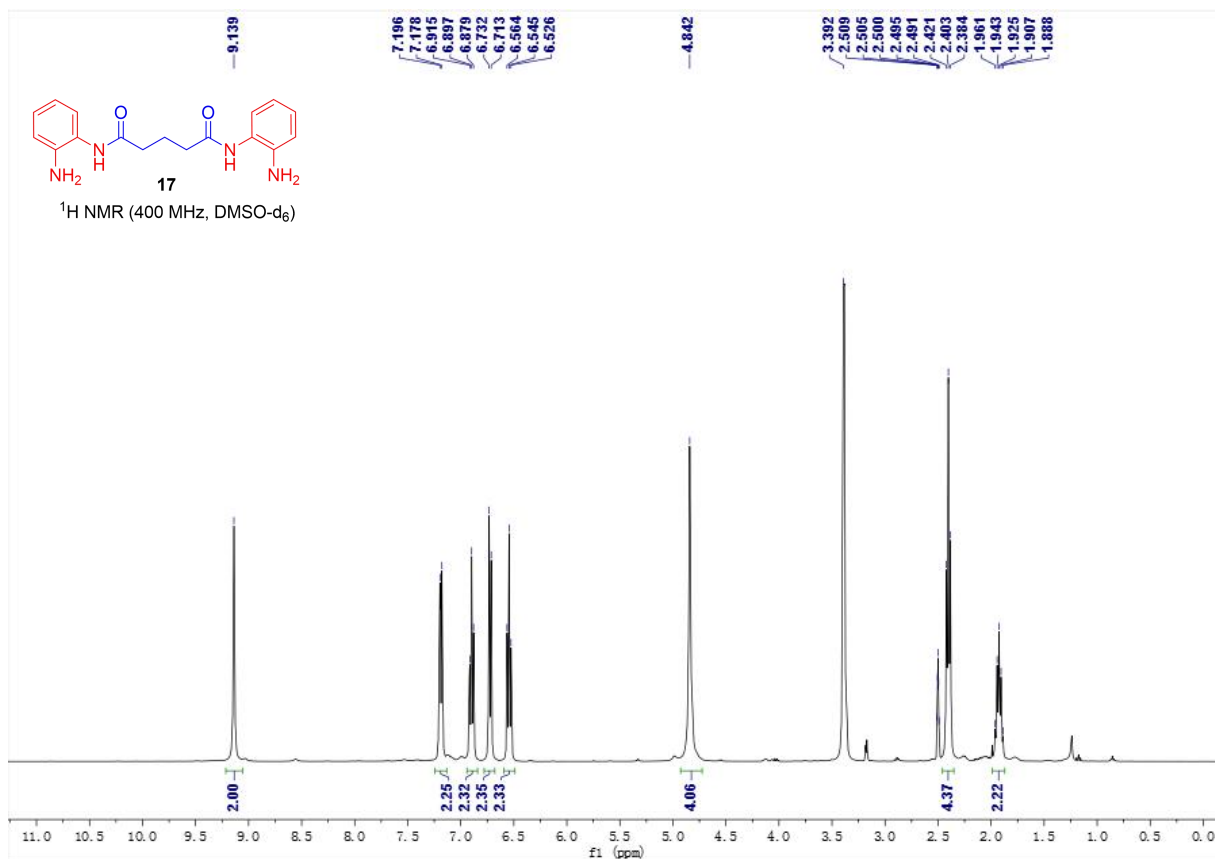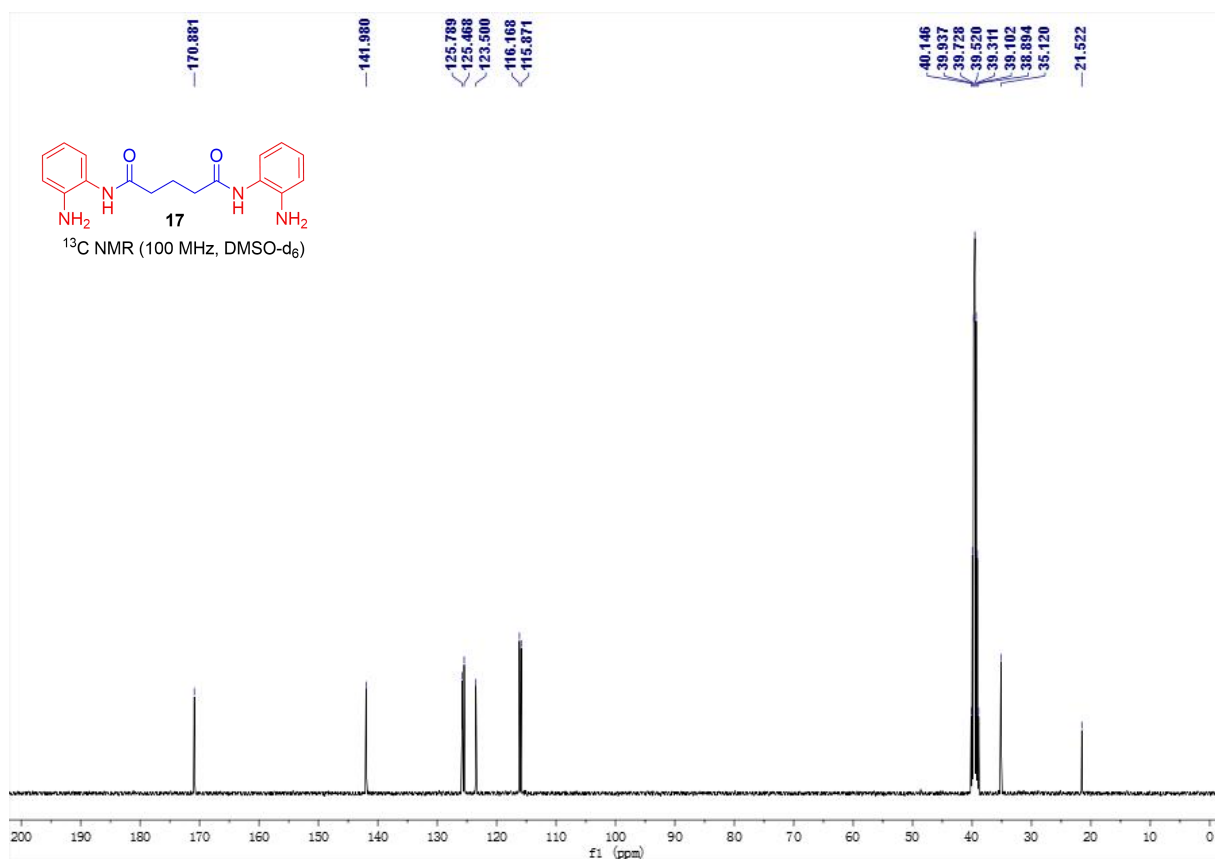

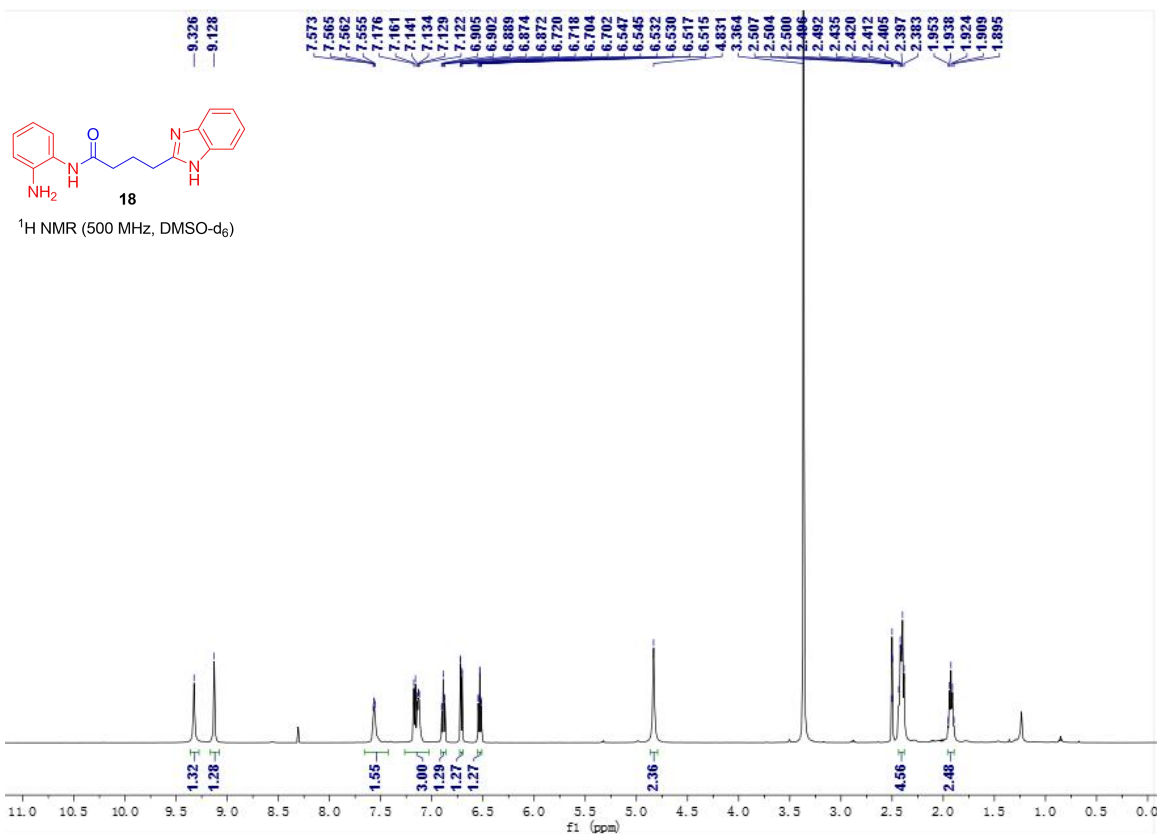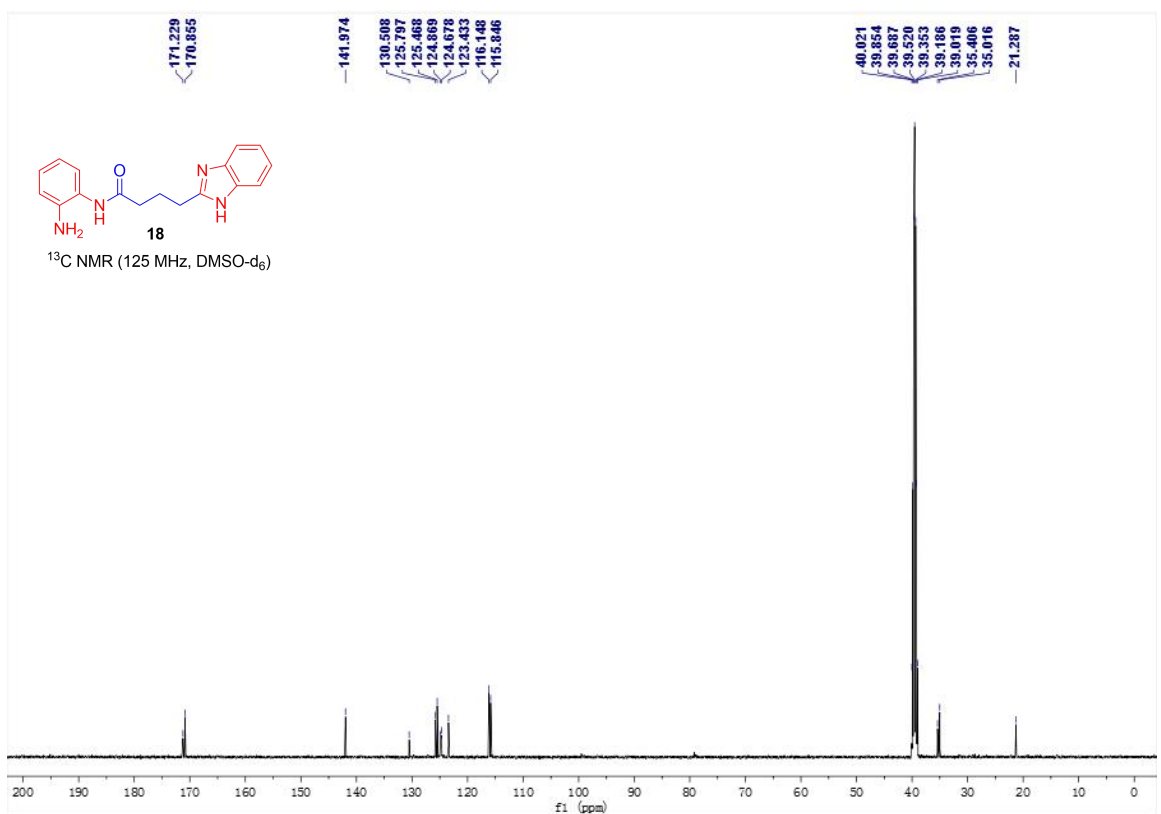

Supplement: d4qo00613e1.pdf [file d4qo00613e1.pdf]
